# Supplementary material for: Analysis of the potential for point-of-care test to enable individualised treatment of infections caused by antimicrobial-resistant and susceptible strains of Neisseria gonorrhoeae: a modelling study
Source: PubMed Central journal article supplement (PMC5734280; doi:10.1136/bmjopen-2016-015447), 2017-06-14
Supplement: bmjopen-2016-015447.draft_revisions.pdf [file bmjopen-2016-015447.draft_revisions.pdf]

# BMJ Open

## Analysis of the potential impact of a point-of-care test to distinguish gonorrhoea cases caused by antimicrobial-resistant and susceptible strains of *Neisseria gonorrhoeae*

|                                 |                                                                                                                                                                                                                                                                                                                                                                                                                                                                           |
|---------------------------------|---------------------------------------------------------------------------------------------------------------------------------------------------------------------------------------------------------------------------------------------------------------------------------------------------------------------------------------------------------------------------------------------------------------------------------------------------------------------------|
| Journal:                        | <i>BMJ Open</i>                                                                                                                                                                                                                                                                                                                                                                                                                                                           |
| Manuscript ID                   | bmjopen-2016-015447                                                                                                                                                                                                                                                                                                                                                                                                                                                       |
| Article Type:                   | Research                                                                                                                                                                                                                                                                                                                                                                                                                                                                  |
| Date Submitted by the Author:   | 05-Dec-2016                                                                                                                                                                                                                                                                                                                                                                                                                                                               |
| Complete List of Authors:       | Turner, Katy; Bristol University<br>Christensen, Hannah; University of Bristol, School of Social and Community Medicine<br>Adams, Elisabeth; Aquarius Population Health, Managing Director and Founder<br>McAdams, David ; Duke University, Duke Fuqua School of Business<br>Fifer, Helen; Public Health England Colindale, Bacteriology Reference Department<br>McDonnell, Anthony ; Wellcome Trust<br>Woodford, Neil; Public Health England, National Infection Service |
| <b>Primary Subject Heading</b>: | Infectious diseases                                                                                                                                                                                                                                                                                                                                                                                                                                                       |
| Secondary Subject Heading:      | Diagnostics, Epidemiology                                                                                                                                                                                                                                                                                                                                                                                                                                                 |
| Keywords:                       | INFECTIOUS DISEASES, Diagnostic microbiology < INFECTIOUS DISEASES, HEALTH ECONOMICS                                                                                                                                                                                                                                                                                                                                                                                      |
|                                 |                                                                                                                                                                                                                                                                                                                                                                                                                                                                           |

SCHOLARONE™  
Manuscripts

1  
2  
3 **1 Analysis of the potential for point-of-care test to enable individualised treatment of**  
4 **2 infections caused by antimicrobial-resistant and susceptible strains of *Neisseria***  
5 **3 *gonorrhoeae***  
6 **4**

7 5 Katy ME Turner, Hannah Christensen, Elisabeth J Adams, David McAdams, Helen Fifer,  
8 6 Anthony McDonnell, Neil Woodford  
9 7

10 8  
11 9 School of Veterinary Sciences, University of Bristol, Langford House, Langford, Bristol BS40  
12 10 5DU, UK  
13 11 Katy ME Turner  
14 12 Senior Lecturer  
15 13

16 14 School of Social and Community Medicine, University of Bristol, Oakfield House, Oakfield  
17 15 Grove, Bristol, BS8 2BN, UK  
18 16 Hannah Christensen  
19 17 Lecturer  
20 18

21 19 Aquarius Population Health, 58a Highgate High Street, London N6 5HX, UK  
22 20 Managing Director and Founder  
23 21 Elisabeth Adams  
24 22

25 23 Duke Fuqua School of Business, 100 Fuqua Drive, A416, Durham, NC 27708, USA  
26 24 Professor of Business Administration and Economics  
27 25 David McAdams  
28 26

29 27 Bacteriology Reference Department, National Infection Service, Public Health England,  
30 28 London, UK  
31 29 Consultant Microbiologist  
32 30 Helen Fifer  
33 31

34 32 The O'Neill Review on Antimicrobial Resistance, Wellcome Trust, London, UK  
35 33 Head of Economic Research  
36 34 Anthony McDonnell  
37 35

38 36 Bacteriology Reference Department, National Infection Service, Public Health England,  
39 37 London, UK  
40 38 Head, AMRHAI Reference Unit  
41 39 and  
42 40 The O'Neill Review on Antimicrobial Resistance, Wellcome Trust, London, UK  
43 41 Scientific Advisor  
44 42 Neil Woodford  
45 43

46 44 Correspondence to:  
47 45 Katy ME Turner  
48 46 E: [katy.turner@bristol.ac.uk](mailto:katy.turner@bristol.ac.uk)  
49 47 T: +44 (0) 117 3314563  
50 48  
51 49

52 50  
53 50 Keywords: point-of-care test; *Neisseria gonorrhoeae*; antimicrobial-resistance  
54 51

55 52 Word count: 2939  
56 53 *Excluding title page, abstract, references, figures and tables.*  
57 54

1  
2  
3 **Abstract**

4 **Objective:** To create a mathematical model to investigate the treatment impact and  
5 economic implications of introducing an antimicrobial resistance point-of-care test (AMR  
6 POCT) for gonorrhoea as a way of extending the life of current last-line treatments.  
7

8 **Design:** Modelling study.  
9

10 **Setting:** England.  
11

12 **Population:** Patients accessing sexual health services.  
13

14 **Interventions:** Incremental impact of introducing a hypothetical AMR POCT that could  
15 detect susceptibility to previous first line antibiotics e.g. ciprofloxacin or penicillin so that  
16 patients are given more tailored treatment, compared with the current situation where all  
17 patients are given therapy with ceftriaxone and azithromycin. The hypothetical intervention  
18 was assessed using a mathematical model developed in Excel. The model included initial  
19 and follow-up attendances, loss to follow-up, use of standard or tailored treatment, time  
20 taken to treatment and the costs of testing and treatment.  
21

22 **Main outcome measures:** Number of doses of ceftriaxone saved, mean time to most  
23 appropriate treatment, mean number of visits per (infected) patient, number of patients lost  
24 to follow-up and total cost of testing.  
25

26 **Results:** In the current situation an estimated 33,431 ceftriaxone treatments are  
27 administered annually and 792 gonococcal infections remain untreated due to loss to follow-  
28 up. The use of an AMR POCT for ciprofloxacin could reduce these ceftriaxone treatments  
29 by 66%, and for an AMR POCT for penicillin by 79%. The mean time for patients receiving  
30 an antibiotic treatment is reduced by 2 days in scenarios including POCT and no positive  
31 patients remain untreated through eliminating loss to follow-up. Such POCTs are estimated  
32 to add £34 million to testing costs, but this does not take into account reductions in costs of  
33 repeat attendances and the reuse of older, cheaper antimicrobials.  
34

35 **Conclusions:** The introduction of AMR POCT could allow clinicians to discern between the  
36 majority of gonorrhoea-positive patients with strains that could be treated with older,  
37 previously abandoned first-line treatments, and those requiring our current last-line dual  
38 therapy. Such tests could extend the useful life of dual ceftriaxone and azithromycin  
39 therapy, thus pushing back the time when gonorrhoea may become untreatable.  
40  
41  
42  
43  
44  
45  
46  
47  
48  
49  
50  
51  
52  
53  
54  
55  
56  
57  
58  
59  
60

### 1 **What is already known on this subject**

- 2 • The rise of antimicrobial resistant gonorrhoea is a pressing public health problem  
3 because gonorrhoea is the second most common bacterial sexually transmitted infection  
4 in the UK and untreated disease can lead to serious complications.
- 5 • The currently recommended first-line treatment of ceftriaxone and azithromycin is also  
6 our last-line treatment option, raising concern that gonorrhoea could soon become  
7 untreatable.
- 8 • Most strains of *Neisseria gonorrhoeae* in the UK are susceptible to older, abandoned  
9 first-line treatments, but characterisation of the resistance/susceptibility profiles of  
10 infection is not available at the time of diagnosis and treatment.

### 11 **What this study adds**

- 12 • Model estimates suggest the use of a hypothetical antimicrobial resistance point-of-care  
13 test (AMR POCT) for ciprofloxacin resistance could prevent 22,054 treatments with  
14 ceftriaxone annually (66% reduction), and an AMR POCT for penicillin resistance could  
15 prevent 26,499 ceftriaxone treatments (79% reduction).
- 16 • The use of AMR POCTs could reduce the mean time for patients receiving the most  
17 appropriate treatment by two days and prevent positive individuals remaining untreated  
18 through the elimination of loss to follow-up.
- 19 • Assuming an AMR POCT added £25 to the testing costs, using such a test would  
20 increase the total cost of testing in England by £34 million annually, though a proportion  
21 of this would be offset through reductions in (re)testing and the re-use of older cheaper  
22 antimicrobials.

## 1 INTRODUCTION

2 Increasing antimicrobial resistant gonorrhoea represents a significant and urgent public  
3 health problem. Gonorrhoea, caused by *Neisseria gonorrhoeae* is the second most  
4 commonly diagnosed bacterial sexually transmitted infection (STI) in England. *N.*  
5 *gonorrhoeae* has evolved resistance to all major drug classes and has been recognised as a  
6 bacterium of international concern by World Health Organization (WHO) <sup>1</sup> and has been  
7 prioritised in the UK five-year antimicrobial resistance strategy<sup>2</sup>.

8  
9 Diagnoses have more than doubled from 16,839 in 2010 to 41,193 in 2015, mainly due to  
10 increased diagnoses in men who have sex with men (MSM), accounting for 70% of male  
11 infections in 2015, illustrated in Figure 1 <sup>3</sup> (data reported through GUMCADv2, including  
12 GUM clinics and other sexual health service providers, but not general practice). Infections  
13 are often asymptomatic, especially in women and in pharyngeal and rectal infections in  
14 MSM, but are still transmissible<sup>5</sup>. If untreated, complications of infection include pelvic  
15 inflammatory disease, infertility, increased risk of pregnancy complications and, in rare  
16 cases, life-threatening septicaemia<sup>6</sup>. Gonorrhoea infection also increases the risk of HIV  
17 acquisition<sup>7</sup>.

18  
19 <sup>3</sup>In the UK, the Gonococcal Resistance to Antimicrobial Surveillance Program (GRASP) has  
20 performed sentinel antibiotic susceptibility testing of gonorrhoea since 2000<sup>11</sup>. Increases in  
21 resistance to first line therapies resulted in two changes in treatment recommendation  
22 (Figure 1): from ciprofloxacin to cefixime in 2005 and then to ceftriaxone plus azithromycin in  
23 2011 <sup>8,10,11</sup>. Our current first-line therapy is also our last-line option, and whilst the use of  
24 dual therapy is intended to delay resistance developing to ceftriaxone, decreased  
25 susceptibility to either of these drugs could lead to untreatable infections. Whilst new  
26 antibiotics are in development, their use in the clinic may be many years away and already  
27 the world's first reported clinical treatment failure with confirmed ceftriaxone and  
28 azithromycin resistance has occurred <sup>11</sup>.

29  
30 There are two main challenges to the management of gonorrhoea which contribute to the  
31 problem of resistance, illustrated in Figure 2. 1) Precautionary treatment: at the time of  
32 diagnosis, such that all infections are treated as if they are resistant to older antibiotics and  
33 2) Epidemiological treatment: sexual contacts of gonorrhoea cases are often treated before  
34 diagnostic test results are known resulting in unnecessary treatment of uninfected partners.  
35 The cornerstone of gonorrhoea management to date has been to ensure rapid, highly  
36 effective treatment is given to prevent the onward spread of infection to sexual partners and

1  
2  
3 1 to prevent people not returning for treatment following a diagnosis. In the context of antibiotic  
4 2 resistance and new diagnostic technologies, it is necessary to reassess these priorities.  
5  
6 3

7 4 Strategies are required to extend the life of existing antimicrobials for the successful  
8 5 treatment of gonorrhoea. Most infections diagnosed in the UK are susceptible to cefixime,  
9 6 ciprofloxacin and even penicillin <sup>11</sup>. Therefore, if a point-of-care test (POCT) could be  
10 7 developed to test for resistance (or susceptibility) to antibiotics, most patients could be  
11 8 treated with an older oral first-line therapy, potentially extending the life of ceftriaxone as our  
12 9 last-line therapy. <sup>12</sup>A promising option based on existing nucleic acid amplification test  
13 10 (NAAT) could be a PCR test for ciprofloxacin resistance, using the *gyrA* Gene as a target  
14 11 <sup>12,13</sup>. Other technologies could involve direct measurement of live cell responses to the  
15 12 presence of a panel of antibiotics including microfluidic devices, atomic force microscopy,  
16 13 volatile chemical detection or mass spectroscopy. Computational approaches based on *in*  
17 14 *silico* phenotyping based on genotype may also be able to detect new mutations more  
18 15 rapidly than traditional microbiological testing <sup>14-16</sup>. In this study we developed a  
19 16 mathematical model to investigate the treatment impact and economic implications of  
20 17 introducing an antimicrobial resistance (AMR) POCT for gonorrhoea.  
21  
22  
23  
24  
25  
26  
27  
28  
29

## 30 19 **METHODS**

### 31 20 **Model**

32 21 We developed a decision tree model in Excel to consider the impact of a hypothetical new  
33 22 AMR POCT on testing, diagnosis and treatment of gonorrhoea in sexual health clinics in  
34 23 England (Figure 3), compared to current practice. Genitourinary clinics typically triage  
35 24 attending patients based on whether they have symptoms or report contact with a sexual  
36 25 partner infected with a specific infection (“same day management”) and those without  
37 26 symptoms (“delayed management”) where treatment is delayed until the results of diagnostic  
38 27 tests are returned from the laboratory (2-7 days) (Figure 2). Current practice is therefore a  
39 28 mixture of same day management and delayed management depending on clinic patient  
40 29 mix. Guidelines recommend that patients treated for gonorrhoea also have swabs taken at  
41 30 the time of treatment that are sent for susceptibility testing, but these results are not  
42 31 available until after treatment has been given. The alternative strategy is based on a point of  
43 32 care gonorrhoea diagnostic test for all patients. The point of care test (POCT) could be either  
44 33 a simple diagnostic for gonorrhoea (infected/not infected) or a test which can discriminate  
45 34 between one specific resistance/susceptibility determinants (POCT AMR). More complex  
46 35 testing algorithms and diagnostic technologies could be envisioned, for example only using  
47 36 an AMR POCT if the initial simple POCT is positive (reflex testing) or using more complex  
48 37 algorithms and new technologies to determine optimal treatment options. In this preliminary  
49  
50  
51  
52  
53  
54  
55  
56  
57  
58  
59  
60

1  
2  
3 1 example we consider two options of antimicrobial susceptibility 1) ciprofloxacin and 2)  
4 penicillin.<sup>17,18</sup>  
5  
6  
7  
8

9 4 The model was based upon an existing pathway model used to investigate the impact of  
10 5 introducing a dual POCT for gonorrhoea and chlamydia in a genitourinary medicine (GUM)  
11 6 setting<sup>18,19</sup>, but simplified in that onward transmission of gonorrhoea and partner notification  
12 7 were not included, with the focus being on diagnosis and tailored treatment, shown in Figure  
13 8 3. We explicitly included branches to differentiate susceptible and resistant isolates within  
14 9 the pathway framework. For the purpose of our study, we assumed that all point of care  
15 10 tests are 100% sensitive and specific for simplicity. Previous models have considered  
16 11 variable specificity and sensitivity requirements in more detail<sup>17</sup>.  
17  
18  
19  
20

21 13 Hypothetical cohorts of patients were followed through the pathway (MSM, heterosexual  
22 14 men and heterosexual women). Individuals could either receive same-day management or  
23 15 delayed management (Figure 3) under current practice or for POCT pathway all patients are  
24 16 assumed tested, diagnosed and treated on the same day. The only difference between  
25 17 POCT and AMR POCT is therefore in the choice of antimicrobial therapy. Treatments  
26 18 modelled were either our current last-line dual therapy of ceftriaxone and azithromycin  
27 19 (current pathway or simple POCT), or in the case of scenarios including AMR POCT a  
28 20 proportion of patients were provided with either ciprofloxacin or penicillin, plus azithromycin  
29 21 co-therapy, as an alternative regimen where possible. Loss to follow-up when patients were  
30 22 recalled for treatment following laboratory testing to determine positivity for gonorrhoea was  
31 23 explicitly included for current pathway only. We assumed that results of point of care  
32 24 diagnostics can be provided within the clinical consultation, e.g. if patients provide samples  
33 25 for testing on arrival at a GUM clinic and then wait for an appointment or return later in the  
34 26 day. It is possible that this would result in delays to treatment for symptomatic individuals  
35 27 and sexual contacts, but we do not consider this further here as we are exploring the  
36 28 potential of theoretical new tests.  
37  
38  
39  
40  
41  
42  
43  
44  
45  
46

### 47 **Parameter values**

48 30 Full model parameters are provided in the Appendix Table A1 and Table A2. Estimates of  
49 31 the numbers of patients attending GUM clinics and tested for and diagnosed with  
50 32 gonorrhoea were based on recent data from Public Health England (PHE)<sup>4</sup>. The model is run  
51 33 assuming 515,094 MSW, 145,863 MSM and 779,085 women attend a GUM clinic in 2014)<sup>4</sup>  
52 34 and the proportions entering same day management or who are infected adjusted to  
53 35 generate the observed diagnoses of gonorrhoea in each group. In 2014, there were over  
54 36 33,000 diagnoses of gonorrhoea reported by PHE, just over half in men who have sex with  
55 37  
56  
57  
58  
59  
60

1 men (MSM) and the remaining heterosexual cases split roughly equally between men and  
2 women. We combined data on patients presenting as contacts of gonorrhoea cases or with  
3 symptoms into the “same-day management” pathway. Asymptomatic patients were tested,  
4 but treatment was assumed to be delayed until the results of laboratory tests were known.  
5 We distributed infected patients between the pathways according to specific parameters for  
6 each patient group based on the probability of being infected and the likelihood of having  
7 symptoms. Symptomatic patients are more likely to be managed on the same day as testing  
8 and heterosexual men (MSW) are the most likely to be symptomatic, followed by MSM, then  
9 women. (Data from the Maximising STI Control trial, personal communication Cath Mercer)  
10 (Table 1)<sup>18,19,20</sup>. These parameters were informed by national PHE data where available and  
11 supplemented with additional data or clinical experience and are described fully elsewhere  
12<sup>18,20</sup>. The difference between MSM and MSW may be due to a combination of factors  
13 including higher probability of extra-genital infection, higher incidence of repeat infections  
14 and higher probability of HIV coinfection and higher frequency of STI testing in this group.<sup>21</sup>  
15 We estimated the proportions of infections that are resistant to ciprofloxacin and/or penicillin  
16 from the GRASP 2014 report, which included systematic susceptibility testing at the PHE  
17 reference laboratory from sentinel surveillance sites and a larger but less well defined  
18 analysis of samples tested locally<sup>9</sup>. Parameters were varied to be appropriate to three  
19 patient groups: heterosexual men, MSM, and women. In the baseline case we assumed that  
20 all confirmed and presumptive gonorrhoea infections are treated with ceftriaxone and  
21 azithromycin because there is >5% resistance to alternative regimens, resulting in 100% of  
22 infections treated as if they are resistant to other antibiotics (such as ciprofloxacin). The cost  
23 for patients attending GUM were taken from the latest payment by results tariff<sup>22</sup>. An AMR  
24 POCT is not currently available so we assumed conservatively that separate new tests for  
25 assessing resistance to either ciprofloxacin or penicillin would each incur an additional £25  
26 testing cost.

### 27 28 **Management scenarios**

29 We considered the following scenarios for each of the three patient groups (MSM,  
30 heterosexual men and women).

- 31 1) Current management – clinicians have no knowledge of the resistance profile of  
32 gonorrhoea at the point of initial treatment and consequently all patients are treated  
33 with ceftriaxone and azithromycin. Some patients are managed on the same day,  
34 either due to symptoms and positive microscopy or as contacts of infected  
35 individuals, others wait for lab results, resulting in some unnecessary treatment and  
36 some delays to treatment or loss to follow-up. (Figure 3A)



- 1
- 2
- 3 1 2) Simple POCT management – all patients tested and managed same day but all
- 4 2 treated as if resistant to older antibiotics (i.e. ceftriaxone and azithromycin)
- 5
- 6 3 3) AMR POCT management - all patients tested with AMR POCT for gonorrhoea that
- 7 4 could identify infections that do not need to be treated with ceftriaxone
- 8
- 9 5 a. assuming current ciprofloxacin resistance prevalence<sup>9</sup>. (Figure 3B)
- 10 6 b. assuming current penicillin resistance prevalence<sup>9</sup>.
- 11 7
- 12
- 13
- 14

## 15 **Economic analysis**

16 The primary outcomes were: the number of doses of ceftriaxone saved; and the mean time  
17 to appropriate treatment. In addition, we calculated the average number of visits per person  
18 and per infected person, the total cost of testing and the number of patients lost to follow up.  
19 In each case we compared the incremental benefit of an AMR POCT with current testing  
20 practice. Analyses were undertaken from the NHS perspective with costs measured in  
21 pounds sterling at 2014 prices.  
22  
23  
24  
25

## 26 **RESULTS**

27 We modelled a snapshot of GUM attendance, gonorrhoea diagnosis and prevalence of  
28 resistance to ciprofloxacin and penicillin based on the situation in England, 2014<sup>4</sup>. Under  
29 current treatment guidelines for 1.4 million people attending GUM per year we estimate  
30 33,431 ceftriaxone treatments are currently administered annually and 792 gonococcal  
31 infections remain untreated due to loss to follow-up. In those receiving antibiotics, the mean  
32 time to treatment was estimated to be 2.2 days. Under current practice, 68% (MSW), 63%  
33 (MSM) and 21% (Women) who are infected with gonorrhoea are treated on the same day as  
34 they attend. The mean number of attendances at clinic per infected person was 1.44. We  
35 estimated the total cost of current testing to be £196 million. If a POCT test is used  
36 (strategies 2-4), this enables same-day testing and treatment, patients would only need to  
37 visit once, all infected individuals would be treated on the same day as the test and therefore  
38 no infected individuals would be lost to follow-up and left untreated.  
39  
40  
41  
42  
43  
44  
45  
46

47 The results for AMR POCT (strategy 3, 4) and POCT (strategy 2) only differ by the choice of  
48 treatment regimen. If an AMR POCT for ciprofloxacin resistance were available (strategy 3a)  
49 we estimate its use could prevent 22,054 treatments of ceftriaxone annually (a 66%  
50 reduction) assuming the current levels of resistance to ciprofloxacin (37% of infections in  
51 2014<sup>23</sup>,  
52  
53  
54  
55  
56  
57  
58  
59  
60

1  
2  
3 1 Table 1). Similarly an AMR POCT for penicillin resistance (strategy 3b) at the current levels  
4 of resistance (23% overall) could prevent 26,499 ceftriaxone treatments annually (a 79%  
5 reduction). Assuming an AMR POCT added £25 to the testing costs we estimated the total  
6 cost of testing for each of the POCT scenarios to be £230 million, adding £34 million to the  
7 annual cost of testing.  
8  
9

## 10 11 12 **DISCUSSION**

### 13 **Statement of principal findings**

14  
15 Our model estimates that 66% of the 33,431 ceftriaxone treatments given annually to  
16 individuals with gonorrhoea could be replaced by ciprofloxacin, thus extending the life of our  
17 current last-line treatment, if an AMR POCT for ciprofloxacin resistance was available. If an  
18 AMR POCT for penicillin was available, 79% of ceftriaxone treatments could be substituted  
19 with penicillin. The use of POCTs would mean a two day reduction in the time that people  
20 wait, on average, for appropriate treatment compared with current practice and such testing  
21 would prevent the approximately 800 positive individuals who remain untreated in the current  
22 system due to loss to follow-up. If AMR POCT added £25 to first-line testing costs, we  
23 estimate the use of such tests would increase current treatment and testing costs by £34  
24 million annually. The outcomes related to same day diagnosis and treatment (reduced time  
25 to treatment and reduced follow up) could be achieved by using a simple POCT, as  
26 previously considered<sup>18</sup>. The additional benefit of AMR POCT test is to enable tailored  
27 choice of antimicrobial treatment.  
28  
29

### 30 **Strengths and weaknesses of the study**

31  
32 Our model used recent published data on antimicrobial resistance levels, gonococcal  
33 incidence and current treatment and considered the impact of additional AMR POCT in  
34 distinct population groups, namely heterosexual men, MSM and females. The simplified  
35 model structure, which is available freely online, enables the parameters to be easily  
36 updated and the impact of different scenarios, in different settings, to be considered. We  
37 made the simplifying assumption that the cost of an AMR POCT would add £25 to the  
38 current tariff cost; however, in reality other current activities might be reduced or  
39 discontinued if an AMR POCT was available, such as testing, microscopy, culture and  
40 physical exams or re-attendances, as well as reduced costs associated with re-using  
41 cheaper oral antibiotics. New DNA-based POCT technologies may be able to be combined  
42 to produce a multiplexed test, which may be more economically viable than the separate  
43 specific AMR tests we modelled here. Our cost estimates are therefore likely to be higher  
44 than in practice. New technologies are emerging which may be able to rapidly determine the  
45 bacterial response to a panel of potential antibiotics which would enable highly tailored  
46  
47  
48  
49  
50  
51  
52  
53  
54  
55  
56  
57  
58  
59  
60

1  
2  
3 1 therapy without the need to continuously monitor the efficacy of a test for resistance based  
4 on detecting DNA sequence, but for this preliminary exploration we selected a hypothetical  
5 AMR POCT test which could integrate with existing POCT technologies based on nucleic  
6 acid amplification.  
7  
8

9  
10  
11 6 The model did not capture the indirect effects of reduced transmission to partners or  
12 progression to complications, such as pelvic inflammatory disease and epididymitis. It also  
13 did not consider the longer term effects of changing treatment strategy on the evolution of  
14 drug resistance over time in gonorrhoea infections.  
15  
16

### 17 18 19 20 21 22 23 24 25 26 27 28 29 30 31 32 33 34 35 36 37 38 39 40 41 42 43 44 45 46 47 48 49 50 51 52 53 54 55 56 57 58 59 60

11 **Strengths and weaknesses in relation to other studies, discussing important**  
12 **differences in results**

13 To our knowledge, no-one has specifically addressed the question of the added value of a  
14 point-of-care AMR POCT to discriminate between susceptible and resistant strains to guide  
15 initial treatment decisions for gonorrhoea. Others have considered in detail the relative  
16 benefits of POCTs, balancing the need for fast results against cost and test performance<sup>17</sup>.  
17 Adams et al previously showed that a dual chlamydia/gonorrhoea point of care NAAT  
18 diagnostic test pathway could be cost neutral or cost-saving compared with existing methods  
19 even though the test kit itself is more expensive.<sup>18,19</sup> We initially assumed that the POCT  
20 AMR is an additional test cost, however it is probable that a multiplex PCR rapid test could  
21 be designed to include an AMR component which does not compromise the cost or  
22 performance of the basic gonorrhoea diagnostic. An alternative to improving diagnostics,  
23 treatment and surveillance is to develop a vaccine for gonorrhoea and to improve the uptake  
24 of other methods of prevention (such as condoms)<sup>24,25</sup>. A gonorrhoea vaccine has proved  
25 elusive due to the rapidly changing surface antigens, but there may be some cross-reactivity  
26 with vaccines designed to protect against *Neisseria meningitidis*<sup>26</sup>.  
27

28 The main weakness of our study is that it did not address the population level impact of the  
29 introduction of such tests, but only considered a static situation<sup>23,24,27</sup>. Rapid whole genome  
30 sequencing (within 24 hours) has been introduced to help guide treatment decisions for  
31 important nosocomial pathogens, notably MRSA (methicillin-resistant *Staphylococcus*  
32 *aureus*)<sup>16</sup>, but in a community walk-in clinic setting for a low prevalence bacterial infection,  
33 such as gonorrhoea, a test needs to be relatively cheap and results available before the  
34 patient leaves the clinic. Our model did not include dynamic epidemiological or evolutionary  
35 processes, which change the prevalence and incidence of infection (and resistance) over  
36 time<sup>23</sup>. In reality, re-introduction of ciprofloxacin would likely increase the selection for  
37 resistance, which would negate some of the benefits of an AMR POCT. Similarly re-using

1  
2  
3 1 other drugs would also result in increases in resistance observed, including increasing  
4 2 selection for plasmids conferring multidrug resistance. Conversely, if point-of-care  
5 3 technology can reduce the time to treatment and reduce loss to follow-up sufficiently this  
6 4 might reduce the overall population prevalence, which would lead to a virtuous cycle of  
7 5 improved control and reduced transmission risk<sup>28</sup>. We also assume that results of point of  
8 6 care diagnostics can be provided within the clinical consultation. This is not currently  
9 7 possible unless the patient provides samples on arrival then waits to see a clinician or  
10 8 returns for a later appointment. The Cepheid GeneXpert has a turnaround time of about 90  
11 9 minutes which was previously found to result in the majority of men (16/19) not waiting for  
12 10 their results (6 were positive)<sup>30</sup>. Transmission dynamic models can explore the potential  
13 11 consequences without the risks associated with radical changes in prescribing practices.  
14 12 The next steps will be to develop dynamic models which include selective pressure under  
15 13 differing treatment options<sup>29</sup> and incorporating variable delays.

16 14  
17 15  
18 16 The important next questions arising from this study are: how much time does the reduction  
19 17 in use of ceftriaxone buy in terms of slowing or preventing the emergence of clinically  
20 18 relevant gonorrhoea resistant to ceftriaxone and, second, what are the population-level  
21 19 benefits of improved gonorrhoea control?  
22 20  
23 21  
24 22  
25 23

### 26 24 **Meaning of the study: possible explanations and implications for clinicians and 27 25 policymakers**

28 26 The major benefit of point of care tests for gonorrhoea is increasing the proportion of  
29 27 patients treated appropriately on the same day as the test, which is likely to improve  
30 28 outcomes by reducing infectious duration, reducing loss to follow-up and potentially  
31 29 improving partner notification efficacy. A definitive diagnosis on the day of first presentation  
32 30 also prevents unnecessary treatment of those not infected with gonorrhoea. The main  
33 31 benefit of an AMR POCT that can discriminate between susceptible and resistant infections  
34 32 is in enabling the re-introduction of abandoned first-line therapies. Reducing the use of  
35 33 antibiotics, especially of last-line therapies is a key aim of the UK national strategy on  
36 34 antimicrobial resistance. For heterosexual men and MSM a relatively large proportion of  
37 35 infections are already treated on the same day as testing, based on epidemiological, clinical  
38 36 or microbiological evidence (microscopy). However, this proportion is lower for women due  
39 37 to the higher percentage of asymptomatic infections and from poorer sensitivity of detection  
40 38 of gonorrhoea in endocervical and urethral smears. Although new POCTs are likely to be  
41 39  
42 40  
43 41  
44 42  
45 43  
46 44  
47 45  
48 46  
49 47  
50 48  
51 49  
52 50  
53 51  
54 52  
55 53  
56 54  
57 55  
58 56  
59 57  
60 58

1 more expensive than existing tests this would to some extent be offset by the reduction in  
2 further attendances and in the ability to re-use older, cheaper drugs. Given the low  
3 prevalence of gonorrhoea even in high-risk GUM attendees, the cost of treatment and re-  
4 attendances is small in comparison with the cost of attendances for testing and diagnosis. If  
5 a new discriminatory AMR POCT test were prohibitively expensive for routine use, a  
6 combination of a standard point-of-care NAAT (e.g. chlamydia/gonorrhoea) test could be  
7 considered in conjunction with a more specialised gonorrhoea AMR test, although the time  
8 implications of this for patients and clinicians would have to be carefully considered.

### 10 **Unanswered questions and future research**

11 This estimation of the potential reduction in ceftriaxone use is the first step towards  
12 evaluating the long-term effects of such a reduction. Future research investigating how  
13 much the useful lifespan of ceftriaxone as a therapy for gonorrhoea is extended with  
14 particular reductions in ceftriaxone use would be valuable. In the context of the often slow  
15 and expensive new drug pipeline, there is also a question to be answered around the value  
16 placed on each additional year of ceftriaxone availability.

## Acknowledgments

We would like to acknowledge Lord Jim O'Neill, Chairman of the Review on Antimicrobial Resistance and the review team for commissioning the study.

## Contributors

All authors were involved in the conception and design of the research. KT, EA and HC developed the models, following initial work by DM and NW and based on previous published work by EA & KT; KT and HC analysed the model results and all authors interpreted the results. HF and NW provided input into current clinical practice relating to AMR. KT, HC and NW wrote the first draft of the manuscript; all authors drafted the final version of the manuscript. All authors had full access to all of the data in the study and can take responsibility for the integrity of the data and the accuracy of the data analysis.

## Transparency declaration

The lead author affirms that this manuscript is an honest, accurate, and transparent account of the study being reported; that no important aspects of the study have been omitted; and that any discrepancies from the study as planned have been explained.

## Funding

The model was based on work previously funded by Aquarius Population Health<sup>18,19</sup>. KT, EA, KT and HC did not receive any funding from O'Neill review to undertake this project. HC was funded by the National Institute for Health Research Health Protection Research Unit (NIHR HPRU) in Evaluation of Interventions at the University of Bristol in partnership with Public Health England (PHE). The views expressed are those of the author(s) and not necessarily those of the NHS, the NIHR, the Department of Health or Public Health England.

## Competing interests

KT reports grants from EPSRC, during the conduct of the study; personal fees from Aquarius Population Health, other from WHO, grants from Guys and St Thomas Charity, outside the submitted work; and I am an editor of Sexually Transmitted Infections.; HC reports grants from NIHR, during the conduct of the study; other from Sanofi Pasteur, outside the submitted work; EA reports no compensation for the submitted work, and grants from Cepheid, Atlas Genetics, St Georges University of London, Enigma Diagnostics, and AstraZeneca, outside the submitted work; AM reports personal fees from Department of Health, non-financial support from Wellcome Trust, outside the submitted work; NW reports PHE's AMRHAI Reference Unit receiving financial support from Achaogen Inc., Allegra Antiinfectives GmbH, Amplex, AstraZeneca UK Ltd, Becton Dickinson Diagnostics, BSAC,

1  
2  
3 1 Cepheid, Check-Points B.V., Cubist Pharmaceuticals, Department of Health, Enigma  
4 2 Diagnostics, Food Standards Agency, GlaxoSmithKline Services Ltd, Henry Stewart Talks,  
5 3 IHMA Ltd, Merck Sharpe & Dohme Corp., Meiji Seika Kiasya Ltd, Momentum Biosciences  
6 4 Ltd, Nordic Pharma Ltd, Norgine Pharmaceuticals, Rempex Pharmaceuticals Ltd, Rokitan  
7 5 Ltd, Smith & Nephew UK Ltd, Trius Therapeutics, VenatoRx and Wockhardt Ltd, outside the  
8 6 submitted work. DM and HF: no conflicts to declare.  
9  
10  
11  
12

### 13 7 14 8 **Ethical approval**

15 9 Ethical approval was not required for this research, which uses routinely collected data and  
16 10 data from other studies.  
17  
18

### 19 11 20 12 **Data sharing**

21 13 Details of the model data inputs and other assumptions are provided in the methods and  
22 14 supporting parameters table. The model is available from <http://amr-review.org/file/429> and  
23 15 researchers interested in further details may contact the corresponding author  
24 16 at [katy.turner@bristol.ac.uk](mailto:katy.turner@bristol.ac.uk)  
25  
26  
27  
28

### 29 17 30 18 **Copyright**

31 19 The Corresponding Author has the right to grant on behalf of all authors and does grant on  
32 20 behalf of all authors, an exclusive licence on a worldwide basis to the BMJ Publishing Group  
33 21 Ltd to permit this article (if accepted) to be published in BMJ editions and any other BMJ  
34 22 products and sublicences such use and exploit all subsidiary rights, as set out in our licence.  
35  
36  
37  
38  
39  
40  
41  
42  
43  
44  
45  
46  
47  
48  
49  
50  
51  
52  
53  
54  
55  
56  
57  
58  
59  
60

1  
2  
3  
4  
5  
6  
7  
8  
9  
10  
11  
12  
13  
14  
15  
16  
17  
18  
19  
20  
21  
22  
23  
24  
25  
26  
27  
28  
29  
30  
31  
32  
33  
34  
35  
36  
37  
38  
39  
40  
41  
42  
43  
44  
45  
46  
47  
48  
49  
50  
51  
52  
53  
54  
55  
56  
57  
58  
59  
60

1  
2  
3  
4  
5

Figure 1: Number of gonorrhoea diagnoses reported in England, 2006 – 2015, with the change in recommended first line antibiotic treatment shown.

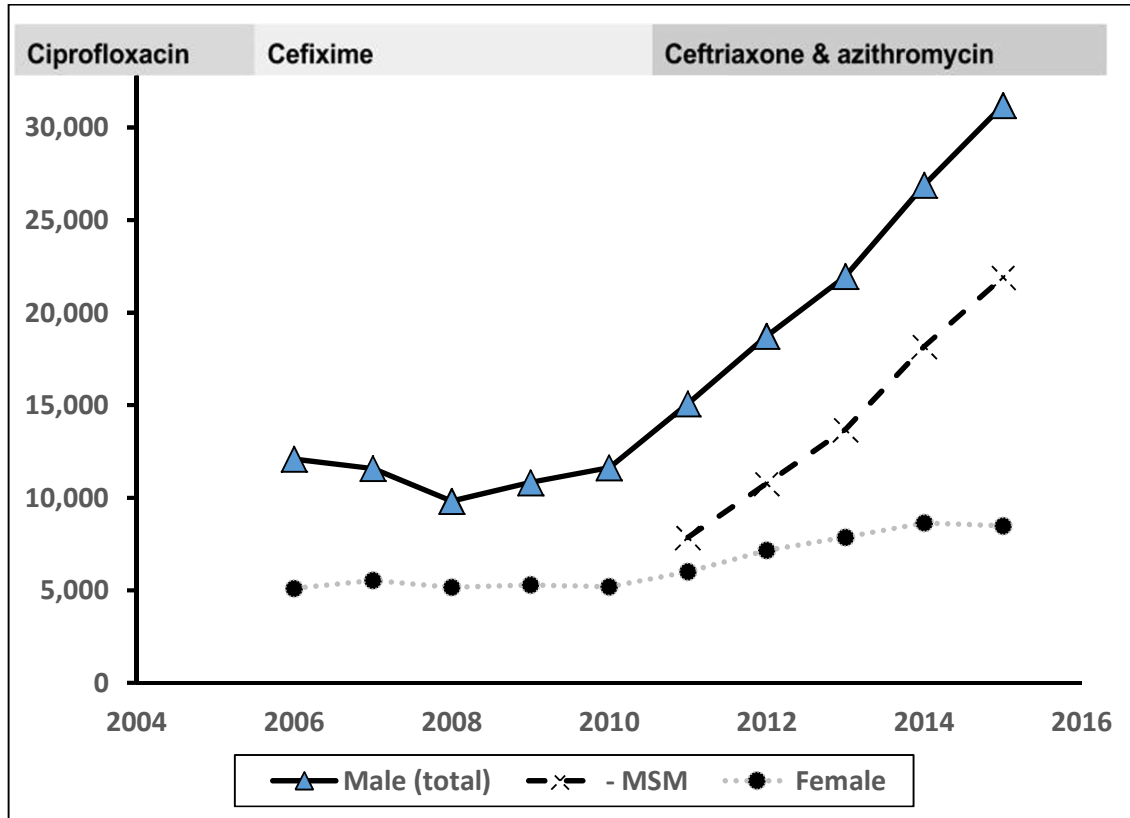

6  
7  
8  
9  
10  
11  
12

Legend: Data from Public Health England, Annual STI Data Tables  
<https://www.gov.uk/government/statistics/sexually-transmitted-infections-stis-annual-data-tables>



1 Figure 2 Current patient pathways for gonorrhoea

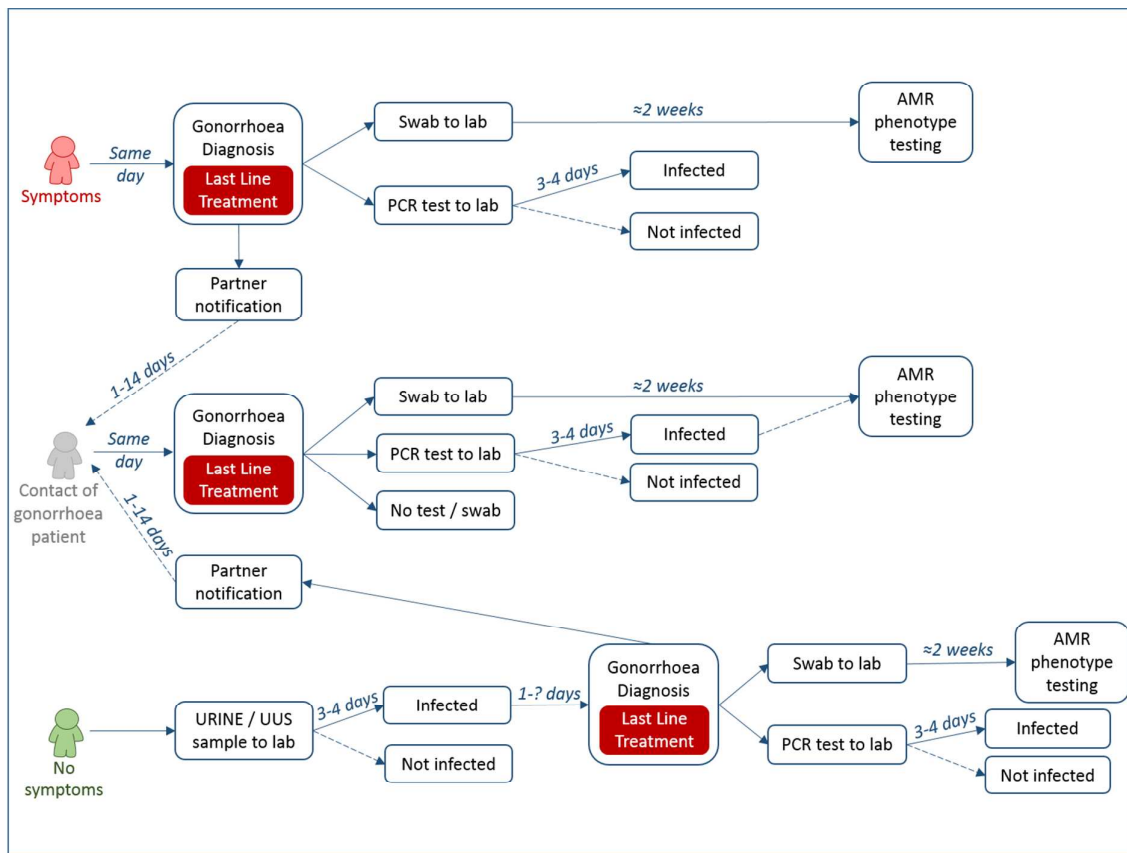

2  
3  
4

view only

1 Figure 3 Patient pathway diagram to illustrate the flow for heterosexual males under A)  
 2 current care, B) antimicrobial resistance point-of-care test

3 Legend: In scenario A, all diagnosed cases are treated with ceftriaxone plus azithromycin. In  
 4 scenario B, diagnosed cases are treated according to resistance profile: AMR cases with  
 5 ceftriaxone plus azithromycin; non-AMR with ciprofloxacin. Numbers of AMR and non-AMR  
 6 infection are based on current levels of ciprofloxacin resistance observed in GRASP  
 7 surveillance data, 2014. Illustrated based on 100,000 heterosexual men attending a  
 8 genitourinary medicine clinic.

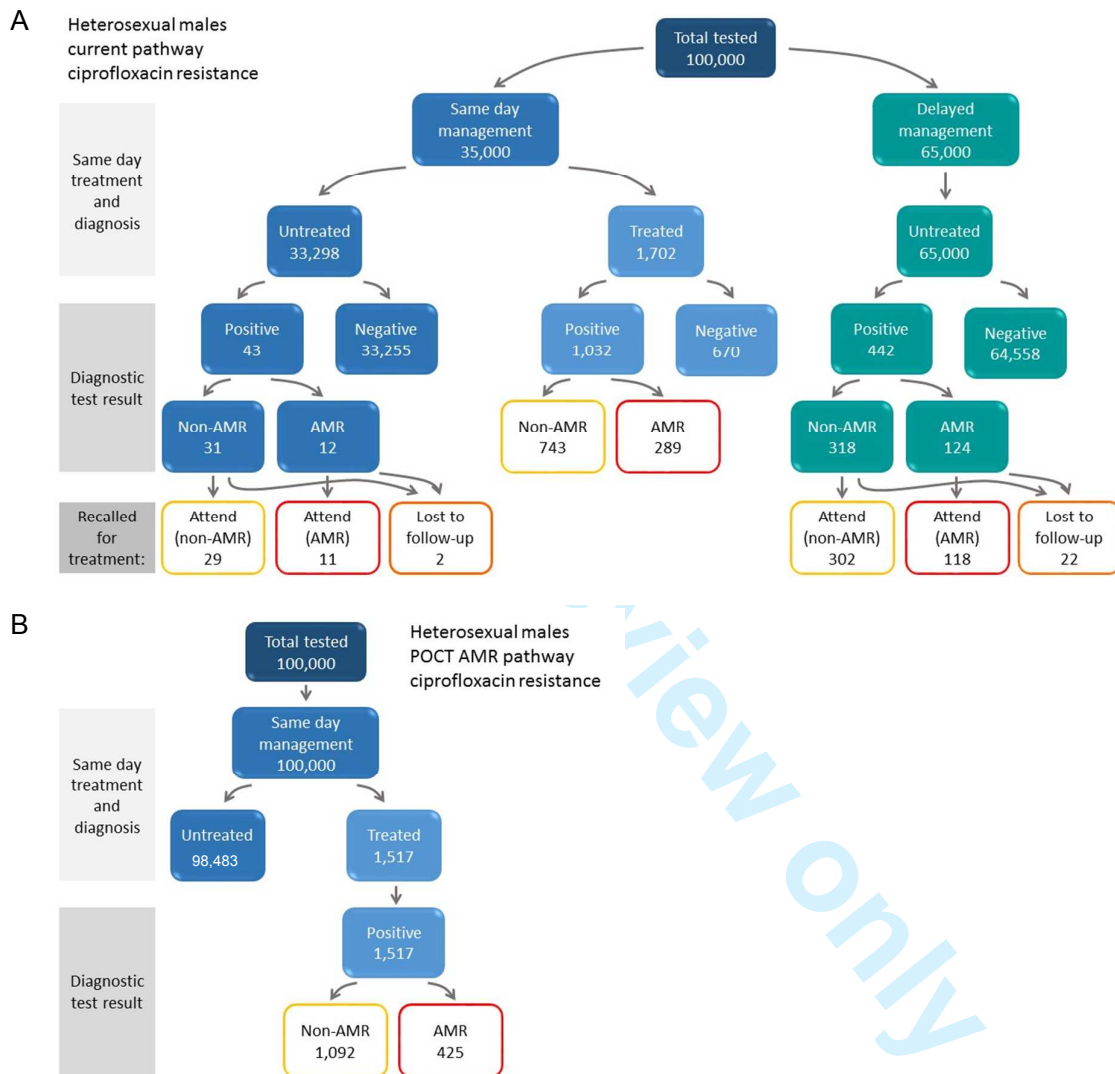

1  
2  
3  
4  
5  
6  
7  
8  
9  
10  
11  
12  
13  
14  
15  
16  
17  
18  
19  
20  
21  
22  
23  
24  
25  
26  
27  
28  
29  
30  
31  
32  
33  
34  
35  
36  
37  
38  
39  
40  
41  
42  
43  
44  
45  
46  
47  
48  
49  
50  
51  
52  
53  
54  
55  
56  
57  
58  
59  
60

9  
10  
11  
12

1 Table 1 Principal results comparing use of an antimicrobial resistance point-of-care test  
 2 (AMR POCT) for ciprofloxacin (Scenario 3a) or penicillin resistance (Scenario 3b) against  
 3 current testing practice (standard laboratory testing, no POCT) for the management of  
 4 gonorrhoea (Scenario 1), assuming the current attendance at GUM clinic annually

|                                                                  | Heterosexual<br>male | MSM   | Female | Overall |
|------------------------------------------------------------------|----------------------|-------|--------|---------|
| <i>Considering use of POCT test for ciprofloxacin resistance</i> |                      |       |        |         |
| Annual ceftriaxone treatments                                    |                      |       |        |         |
| Current (scenario 1)                                             | 7690                 | 17691 | 8050   | 33431   |
| AMR POCT (scenario 3a)                                           | 2188                 | 7933  | 1257   | 11378   |
| Reduction under scenario 3a                                      | 5502                 | 9759  | 6793   | 22054   |
| Percentage reduction in ceftriaxone                              | 72%                  | 55%   | 84%    | 66%     |
| Proportion treated same day                                      |                      |       |        |         |
| Current (scenario 1)                                             | 68%                  | 63%   | 21%    | 54%     |
| AMR POCT (scenario 3a)                                           | 100%                 | 100%  | 100%   | 100%    |
| Increase under scenario 3a                                       | 32%                  | 37%   | 79%    | 46%     |
| Mean time to treatment (days)                                    |                      |       |        |         |
| Current (scenario 1)                                             | 1.5                  | 1.8   | 3.9    | 2.2     |
| AMR POCT (scenario 3a)                                           | 0.0                  | 0.0   | 0.0    | 0.0     |
| Reduction under scenario 3a                                      | 1.5                  | 1.8   | 3.9    | 2.2     |
| Persons lost to follow up (untreated)                            |                      |       |        |         |
| Current (scenario 1)                                             | 125                  | 338   | 329    | 792     |
| AMR POCT (scenario 3a)                                           | 0                    | 0     | 0      | 0       |
| <i>Considering use of POCT test for penicillin resistance</i>    |                      |       |        |         |
| Annual ceftriaxone treatments*                                   |                      |       |        |         |
| Current (scenario 1)                                             | 7690                 | 17691 | 8050   | 33431   |
| AMR POCT (scenario 3b)                                           | 1407                 | 4688  | 838    | 6932    |
| Reduction under scenario 3b                                      | 6283                 | 13004 | 7212   | 26499   |
| Percentage reduction in ceftriaxone                              | 82%                  | 74%   | 90%    | 79%     |

\*All other outcomes same as for use of POCT for ciprofloxacin resistance. MSM, men who have sex with men. Results for strategy 2 not shown – equivalent to strategy 3 except for choice of antibiotic treatment. Results for 3b also equivalent to 3a for outcomes except reduction in ceftriaxone treatments.

#### 5 **Definitions**

6 **GUM: Genitourinary medicine clinic, POCT: Point of care test, AMR: Antimicrobial**  
 7 **resistance, MSM: Men who have sex with men**

1  
2  
3 1 Table 2 Cost of testing and treatment\* when using an antimicrobial resistance point-of-care  
4 2 test (AMR POCT) for ciprofloxacin resistance (strategy 3a) compared with current practice

|                              | Heterosexual<br>male | MSM         | Female       | Overall      |
|------------------------------|----------------------|-------------|--------------|--------------|
| Annual cost of testing       |                      |             |              |              |
| Current                      | £69,784,517          | £20,358,694 | £105,826,467 | £195,969,677 |
| AMR POCT                     | £82,415,040          | £23,338,080 | £124,653,600 | £230,406,720 |
| Increased cost with AMR POCT | £12,630,523          | £2,979,386  | £18,827,133  | £34,437,043  |

5  
6  
7  
8  
9  
10  
11  
12 \*The model assumes that the additional cost of AMR POCT (£25) is simply added to the cost of  
13 attendance, and is not offset by reductions in the number of gonorrhoea infections, by reduced  
14 treatment costs (as some patients are treated with cheaper antibiotics), or by reduced use of other  
15 tests (such as microscopy or culture of all swabs).  
16

17  
18  
19  
20  
21  
22  
23  
24  
25  
26  
27  
28  
29  
30  
31  
32  
33  
34  
35  
36  
37  
38  
39  
40  
41  
42  
43  
44  
45  
46  
47  
48  
49  
50  
51  
52  
53  
54  
55  
56  
57  
58  
59  
60

1  
2  
3 REFERENCE LIST

- 4 1. WHO. Antimicrobial resistance global report on surveillance: 2014 summary. . 2014.  
5 2. Health UGDo. UK Five Year Antimicrobial Resistance Strategy 2013 to 2018., 2011.  
6 3. Public Health England. STI diagnoses & rates by gender, sexual risk & age group,  
7 2011 - 2015, 2016.  
8 4. Public Health England. STI diagnoses & rates by gender, sexual risk & age group,  
9 2010 - 2014, 2015.  
10 5. Korenromp EL, Sudaryo MK, de Vlas SJ, et al. What proportion of episodes of  
11 gonorrhoea and chlamydia becomes symptomatic? *Int J STD AIDS* 2002; **13**(2): 91-101.  
12 6. Yeh JM, Hook EW, 3rd, Goldie SJ. A refined estimate of the average lifetime cost of  
13 pelvic inflammatory disease. *Sex Transm Dis* 2003; **30**(5): 369-78.  
14 7. Chesson HW, Pinkerton SD. Sexually transmitted diseases and the increased risk for  
15 HIV transmission: implications for cost-effectiveness analyses of sexually transmitted  
16 disease prevention interventions. *J Acquir Immune Defic Syndr* 2000; **24**(1): 48-56.  
17 8. Bignell C, Fitzgerald M, Guideline Development G, British Association for Sexual H,  
18 Hiv UK. UK national guideline for the management of gonorrhoea in adults, 2011. *Int J STD*  
19 *AIDS* 2011; **22**(10): 541-7.  
20 9. England. PH. Surveillance of antimicrobial resistance in *Neisseria gonorrhoeae*. Key  
21 findings from the 'Gonococcal resistance to antimicrobials surveillance programme'  
22 (GRASP) and related surveillance data, 2014.  
23 10. Public Health England GRASP Steering Committee and BASHH CEG. Gonorrhoea  
24 Treatment Position Statement 2015.  
25 11. England PH. GRASP Report 2016, 2016.  
26 12. Hemarajata P, Yang S, Soge OO, Humphries RM, Klausner JD. Performance and  
27 Verification of a Real-Time PCR Assay Targeting the *gyrA* Gene for Prediction of  
28 Ciprofloxacin Resistance in *Neisseria gonorrhoeae*. *J Clin Microbiol* 2016; **54**(3): 805-8.  
29 13. Chaudhry U, Ray K, Bala M, Saluja D. Mutation patterns in *gyrA* and *parC* genes of  
30 ciprofloxacin resistant isolates of *Neisseria gonorrhoeae* from India. *Sex Transm Infect* 2002;  
31 **78**(6): 440-4.  
32 14. De Silva D, Peters J, Cole K, et al. Whole-genome sequencing to determine  
33 transmission of *Neisseria gonorrhoeae*: an observational study. *Lancet Infect Dis* 2016;  
34 **16**(11): 1295-303.  
35 15. Allen VG, Melano RG. Whole-genome sequencing-new tools for gonorrhoea control.  
36 *Lancet Infect Dis* 2016; **16**(11): 1214-5.  
37 16. Aanensen DM, Feil EJ, Holden MT, et al. Whole-Genome Sequencing for Routine  
38 Pathogen Surveillance in Public Health: a Population Snapshot of Invasive *Staphylococcus*  
39 *aureus* in Europe. *MBio* 2016; **7**(3).  
40 17. Vickerman P, Watts C, Alary M, Mabey D, Peeling RW. Sensitivity requirements for  
41 the point of care diagnosis of *Chlamydia trachomatis* and *Neisseria gonorrhoeae* in women.  
42 *Sexually Transmitted Infections* 2003; **79**(5): 363-7.  
43 18. Turner KM, Round J, Horner P, et al. An early evaluation of clinical and economic  
44 costs and benefits of implementing point of care NAAT tests for *Chlamydia trachomatis* and  
45 *Neisseria gonorrhoea* in genitourinary medicine clinics in England. *Sex Transm Infect* 2014;  
46 **90**(2): 104-11.  
47 19. Adams EJ, Ehrlich A, Turner KM, et al. Mapping patient pathways and estimating  
48 resource use for point of care versus standard testing and treatment of chlamydia and  
49 gonorrhoea in genitourinary medicine clinics in the UK. *BMJ Open* 2014; **4**(7): e005322.  
50 20. Mercer CH, Macdonald N, Shirley MDF, et al. The Maximising STI Control (MSTIC)  
51 webtool: a new approach to facilitate the planning of services for sexually transmitted  
52 infections to maximise public health benefit. *Lancet* 2013; **382**: 6-.  
53 21. Kent CK, Chaw JK, Wong W, et al. Prevalence of rectal, urethral, and pharyngeal  
54 chlamydia and gonorrhea detected in 2 clinical settings among men who have sex with men:  
55 San Francisco, California, 2003. *Clin Infect Dis* 2005; **41**(1): 67-74.  
56 22. Monitor and NHS England. 2014/15 National Tariff Payment System, 2013.

- 1  
2  
3 1 23. Grad YH, Goldstein E, Lipsitch M, White PJ. Improving Control of Antibiotic-Resistant  
4 2 Gonorrhoea by Integrating Research Agendas Across Disciplines: Key Questions Arising  
5 3 From Mathematical Modeling. *J Infect Dis* 2016; **213**(6): 883-90.  
6 4 24. Garnett GP. The theoretical impact and cost-effectiveness of vaccines that protect  
7 5 against sexually transmitted infections and disease. *Vaccine* 2014; **32**(14): 1536-42.  
8 6 25. Regnier SA, Huels J. Potential impact of vaccination against Neisseria meningitidis  
9 7 on Neisseria gonorrhoeae in the United States: results from a decision-analysis model. *Hum*  
10 8 *Vaccin Immunother* 2014; **10**(12): 3737-45.  
11 9 26. Whelan J, Klovstad H, Haugen IL, Holle MR, Storsaeter J. Ecologic Study of  
12 10 Meningococcal B Vaccine and Neisseria gonorrhoeae Infection, Norway. *Emerg Infect Dis*  
13 11 2016; **22**(6): 1137-9.  
14 12 27. O'Neill J. Tackling Drug-Resistant Infections Globally: final report and  
15 13 recommendations. The review on antimicrobial resistance, 2016.  
16 14 28. White PJ, Ward H, Cassell JA, Mercer CH, Garnett GP. Vicious and virtuous circles  
17 15 in the dynamics of infectious disease and the provision of health care: gonorrhoea in Britain  
18 16 as an example. *J Infect Dis* 2005; **192**(5): 824-36.  
19 17 29. McAdams D. Resistance diagnosis and the changing epidemiology of antibiotic  
20 18 resistance. *Ann N Y Acad Sci* 2017; **1388**(1): 5-17.  
21 19 30. Harding-Esch EM, Hegazi A, Okolo O, et al. P2.163 Do "In-Clinic" Molecular and  
22 20 Non-Molecular Rapid Tests Improve Patient Management? *Sexually Transmitted Infections*  
23 21 2013; **89**(Suppl 1): A137-A8.  
24 22  
25  
26  
27  
28  
29  
30  
31  
32  
33  
34  
35  
36  
37  
38  
39  
40  
41  
42  
43  
44  
45  
46  
47  
48  
49  
50  
51  
52  
53  
54  
55  
56  
57  
58  
59  
60

Figure 1: Number of gonorrhoea diagnoses reported in England, 2006-2015

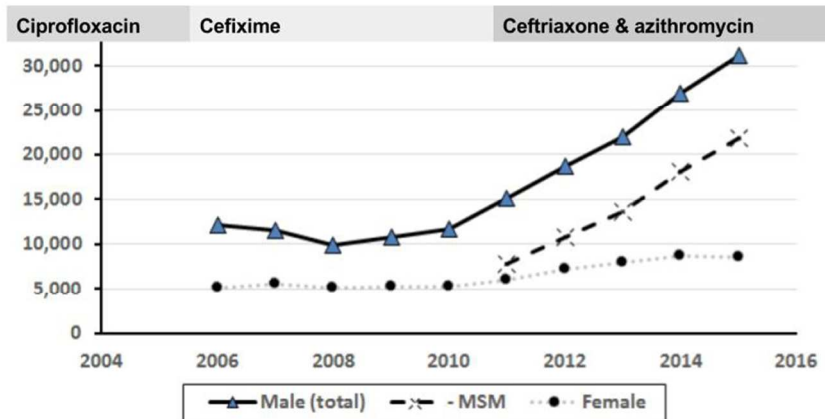

Data from Public Health England Annual STI Data Tables  
<https://www.gov.uk/government/statistics/sexually-transmitted-infections-stis-annual-data-tables>

338x190mm (72 x 72 DPI)

review only

DRAFT 29 June 2016

**Supplementary information for:****Analysis of the potential for point-of-care test to enable individualised treatment of infections caused by antimicrobial-resistant and susceptible strains of *Neisseria gonorrhoeae***

Katy ME Turner, Hannah Christensen, Elisabeth J Adams, David McAdams, Helen Fifer, Anthony McDonnell, Neil Woodford

Table A 1 Current prevalence of antimicrobial resistance to potential treatments for gonorrhoea

| Drug          | Class                                      | Prevalence of resistance in GRASP 2014 isolates <sup>1</sup> |      |       |         |
|---------------|--------------------------------------------|--------------------------------------------------------------|------|-------|---------|
|               |                                            | Heterosexual men                                             | MSM  | Women | Overall |
| Ceftriaxone   | Cephalosporin (3 <sup>rd</sup> generation) | 0                                                            | 0    | 0     | 0       |
| Penicillin    | $\beta$ -lactam                            | 18%                                                          | 26%  | 10%   | 23%     |
| Ciprofloxacin | Fluoroquinolone                            | 28%                                                          | 44%  | 15%   | 37%     |
| Azithromycin  | Macrolide                                  | 0.0%                                                         | 1.4% | 0.5%  | 1.0%    |

Current first line (and last-line) therapy is intramuscular ceftriaxone with azithromycin 1g orally. MSM, men who have sex with men.  
GRASP: Gonococcal Resistance to Antimicrobial Surveillance Programme



DRAFT 29 June 2016

Table A2 Model parameters

| Baseline model parameters                                                                                                              | Current          |         |         | AMR POCT         |         |         |
|----------------------------------------------------------------------------------------------------------------------------------------|------------------|---------|---------|------------------|---------|---------|
|                                                                                                                                        | Heterosexual men | MSM     | Women   | Heterosexual men | MSM     | Women   |
| Initial population size <sup>2</sup>                                                                                                   | 515,094          | 145,863 | 779,085 | 515,094          | 145,863 | 779,085 |
| Proportion entering same day management pathway                                                                                        | 35%              | 33%     | 48%     | 100%             | 100%    | 100%    |
| Proportion infected with gonorrhoea (of total tested) <sup>2</sup>                                                                     | 1.5%             | 12.4%   | 1.1%    | 1.5%             | 12.4%   | 1.1%    |
| Proportion of those in same day pathway infected with gonorrhoea                                                                       | 3.1%             | 26.0%   | 1.0%    | 1.5%             | 12.4%   | 1.1%    |
| Proportion of delayed management infected with gonorrhoea                                                                              | 0.7%             | 5.6%    | 1.2%    | -                | -       | -       |
| Relative risk infection gonorrhoea in same day vs delayed pathway                                                                      | 4.52             | 4.63    | 0.82    | -                | -       | -       |
| Proportion in same day pathway who are infected & treated on same day                                                                  | 96%              | 90%     | 50%     | 100%             | 100%    | 100%    |
| Proportion of same day pathway treated presumptively for gonorrhoea                                                                    | 5.0%             | 25.0%   | 2.0%    | 1.5%             | 12.4%   | 1.1%    |
| Proportion who attend for treatment after lab test result (of those who wait for lab test results, i.e. asymptomatic group (Figure 3)) | 95%              | 95%     | 95%     | 100%             | 100%    | 100%    |
| Proportion treated with last line therapy <sup>3</sup>                                                                                 | 100%             | 100%    | 100%    | 28%              | 44%     | 15%     |
| Cost of first attendance <sup>4 5</sup>                                                                                                | £135             | £135    | £135    | £135             | £135    | £135    |
| Cost of follow-up attendance <sup>4 5</sup>                                                                                            | £104             | £104    | £104    | £104             | £104    | £104    |
| Additional cost of AMR POCT (assumed) <sup>6</sup>                                                                                     | £25              | £25     | £25     | £25              | £25     | £25     |

AMR POCT, antimicrobial resistance point of care test; MSM, men who have sex with men.

DRAFT 29 June 2016

**References**

- 1 Adams EJ, Ehrlich A, Turner KM, Shah K, Macleod J, Goldenberg S, et al. Mapping patient pathways and estimating resource use for point of care versus standard testing and treatment of chlamydia and gonorrhoea in genitourinary medicine clinics in the UK. *BMJ Open* 2014; 4(7): e005322.
- 2 Public Health England. STI diagnoses & rates by gender, sexual risk & age group, 2010 - 2014, 2015.
- 3 England. PH. Surveillance of antimicrobial resistance in *Neisseria gonorrhoeae*. Key findings from the 'Gonococcal resistance to antimicrobials surveillance programme' (GRASP) and related surveillance data, 2014.
- 4 Monitor and NHS England. 2014/15 National Tariff Payment System, 2013.
- 5 Health PHEatDo. HIV, sexual and reproductive health: current issues bulletin 2013. Available from: [https://www.gov.uk/government/uploads/system/uploads/attachment\\_data/file/259087/HIV\\_Sexual\\_and\\_Reproductive\\_Health\\_bulletin-issue1nov2013.pdf](https://www.gov.uk/government/uploads/system/uploads/attachment_data/file/259087/HIV_Sexual_and_Reproductive_Health_bulletin-issue1nov2013.pdf).
- 6 Turner KM, Round J, Horner P, Macleod J, Goldenberg S, Deol A, et al. An early evaluation of clinical and economic costs and benefits of implementing point of care NAAT tests for *Chlamydia trachomatis* and *Neisseria gonorrhoea* in genitourinary medicine clinics in England. *Sex Transm Infect* 2014; 90(2): 104-11.

1  
2  
3  
4  
5  
6  
7  
8  
9  
10  
11  
12  
13  
14  
15  
16  
17  
18  
19  
20  
21  
22  
23  
24  
25  
26  
27  
28  
29  
30  
31  
32  
33  
34  
35  
36  
37  
38  
39  
40  
41  
42  
43  
44  
45  
46  
47  
48  
49  
50  
51  
52  
53  
54  
55  
56  
57  
58  
59  
60

| Scenario                                  |  | Day |           |            |                            |
|-------------------------------------------|--|-----|-----------|------------|----------------------------|
| Initial test                              |  | 0   |           |            |                            |
| Clinical exam or not                      |  | 0   |           |            |                            |
| Same day treatment & diagnosis            |  | 0   |           |            |                            |
| Infection status                          |  |     |           |            |                            |
| Proportion treated with last line therapy |  | 0   | Infected  | Symp. 5538 | Asympt 2277                |
|                                           |  | 0   | Resistant | 997        | 410                        |
| Swab sent for resistance typing (1)       |  | 0   |           |            | Infec 22                   |
| Lab results                               |  | 2   |           |            | 182<br>Alternative regimen |
| Recalled for treatment                    |  | 2   |           |            | Posi<br>182                |
| Attend for treatment                      |  | 5   |           |            | 182                        |
| Swab sent for resistance typing (2)       |  |     |           |            | Atte<br>173<br>173         |

view only

1  
2  
3  
4  
5  
6  
7  
8  
9  
10  
11  
12  
13  
14  
15  
16  
17  
18  
19  
20  
21  
22  
23  
24  
25  
26  
27  
28  
29  
30  
31  
32  
33  
34  
35  
36  
37  
38  
39  
40  
41  
42  
43  
44  
45  
46  
47  
48  
49  
50  
51  
52  
53  
54  
55  
56  
57  
58  
59  
60

Parameter s Type of attendee  
**1** Heterosexual male

Clinical exam  
Same day management  
180283

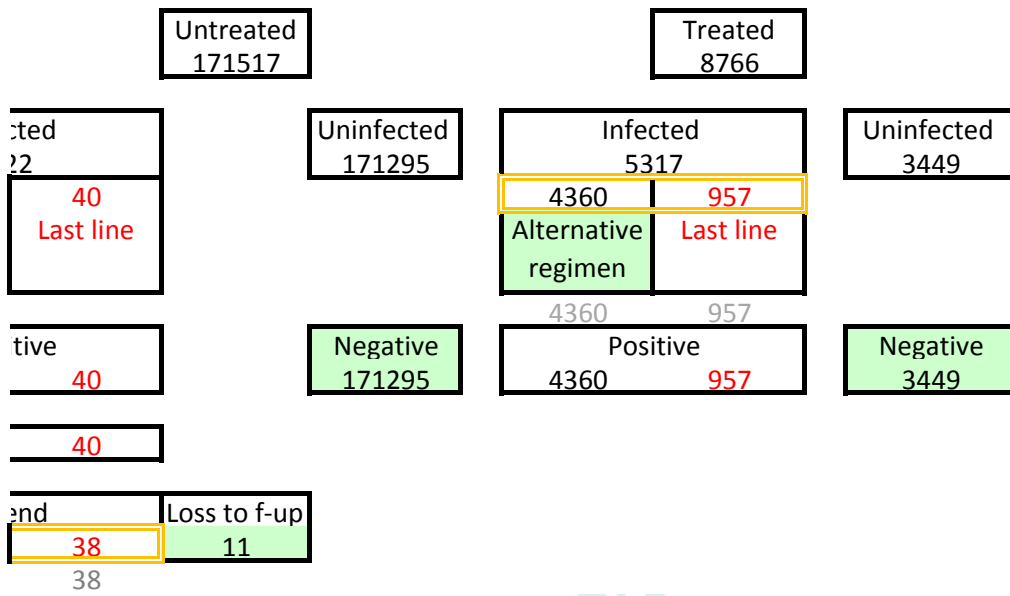

view only

1  
2  
3  
4  
5  
6  
7  
8  
9  
10  
11  
12  
13  
14  
15  
16  
17  
18  
19  
20  
21  
22  
23  
24  
25  
26  
27  
28  
29  
30  
31  
32  
33  
34  
35  
36  
37  
38  
39  
40  
41  
42  
43  
44  
45  
46  
47  
48  
49  
50  
51  
52  
53  
54  
55  
56  
57  
58  
59  
60

|                       |           |              |  |             |
|-----------------------|-----------|--------------|--|-------------|
| Total tested          |           |              |  | Check total |
| 515094                |           |              |  |             |
| Self collected sample |           |              |  | 515094      |
| Delayed management    |           |              |  |             |
| 334811                |           |              |  | 515094      |
| Untreated             |           |              |  |             |
| 334811                |           |              |  | 515094      |
| Infected              |           | Uninfected   |  |             |
| 2277                  |           | 332534       |  | 515094      |
| 1867                  | 410       |              |  |             |
| Alternative regimen   | Last line |              |  |             |
| Positive              |           | Negative     |  |             |
| 1867 410              |           | 332534       |  | 515094      |
| 1867 410              |           |              |  | 514667      |
| Attend                |           | Loss to f-up |  |             |
| 1774                  | 389       | 114          |  |             |
| 1774                  | 389       |              |  |             |

could we treat with cipro rather than

view only

1  
2  
3  
4  
5  
6  
7  
8  
9  
10  
11  
12  
13  
14  
15  
16  
17  
18  
19  
20  
21  
22  
23  
24  
25  
26  
27  
28  
29  
30  
31  
32  
33  
34  
35  
36  
37  
38  
39  
40  
41  
42  
43  
44  
45  
46  
47  
48  
49  
50  
51  
52  
53  
54  
55  
56  
57  
58  
59  
60

|                                                                       |       |
|-----------------------------------------------------------------------|-------|
| Total number follow-up attendances                                    | 2373  |
| Number infected                                                       | 7815  |
| Total visits (for positives)                                          | 10188 |
| Total days waited for appropriate treatment                           | 11867 |
| Number lost to follow up (untreated)                                  | 125   |
| Number of people who are given ceftriaxone, current and POCT scenario | 7690  |
| Number of people who are given ceftriaxone, POCT AMR scenario         | 1384  |
| Number of people who are given ceftriaxone, given parameter set       | 7690  |
| % treated on same day                                                 | 12%   |
| Number treated on same day                                            | 5317  |
| Mean number of days to treatment                                      | 1.5   |

1  
2  
3  
4  
5  
6  
7  
8  
9  
10  
11  
12  
13  
14  
15  
16  
17  
18  
19  
20  
21  
22  
23  
24  
25  
26  
27  
28  
29  
30  
31  
32  
33  
34  
35  
36  
37  
38  
39  
40  
41  
42  
43  
44  
45  
46  
47  
48  
49  
50  
51  
52  
53  
54  
55  
56  
57  
58  
59  
60

For peer review only

1  
2  
3  
4  
5  
6  
7  
8  
9  
10  
11  
12  
13  
14  
15  
16  
17  
18  
19  
20  
21  
22  
23  
24  
25  
26  
27  
28  
29  
30  
31  
32  
33  
34  
35  
36  
37  
38  
39  
40  
41  
42  
43  
44  
45  
46  
47  
48  
49  
50  
51  
52  
53  
54  
55  
56  
57  
58  
59  
60

For peer review only



|                                                                             |    | Live values |
|-----------------------------------------------------------------------------|----|-------------|
| <b>Do not edit live cells!</b>                                              |    | <b>1</b>    |
| Total sexual health screens                                                 | 2  | 36%         |
| Total New STI diagnoses                                                     | 3  | 39%         |
| Proportion symptomatic                                                      | 4  | 35%         |
| Proportion of those symptomatic infected with gonorrhoea                    | 7  | 3%          |
| Proportion of asymptomatic infected with gonorrhoea                         | 8  | 1%          |
| Relative risk infection gonorrhoea if symptomatic cf asymptomatic           | 9  | 4.52        |
| Overall proportion infected GC (asympt +sympt inf/attend)                   | 10 | 2%          |
| Proportion of symptomatic & infected who are treated on same day as test    | 19 | 96%         |
| Proportion of symptomatics treated presumptively for gonorrhoea             | 21 | 5%          |
| Proportion of those positive who attend for treatment after lab test result | 26 | 95%         |
| Proportion of those diagnosed & infected who attend for test of cure        | 27 | 50%         |
| Initial population size                                                     | 28 | 515,094     |
| Proportion treated with last line therapy                                   | 29 | 18%         |
| Proportion reattend for retreatment after resistance diagnosed from         | 31 | 95%         |
| Cost of first attendance                                                    | 32 | £ 135       |
| Cost of follow-up attendance                                                | 33 | £ 104       |
| Type of test used (1 - standard care, 2- POCT, 3 POCT AMR)                  | 34 | 1           |
| Ratio of test cost 3 (AMR POCT) to 2 (POCT)                                 | 35 | 2           |
| Cost of test 2 (POCT) (additional)                                          | 36 | 25          |

| Baseline model parameters SC te |                |                | POCT test baseline    |                |                | POCT AMR baseline     |                |
|---------------------------------|----------------|----------------|-----------------------|----------------|----------------|-----------------------|----------------|
| Heterosex<br>ual male           | MSM            | Female         | Heterosex<br>ual male | MSM            | Female         | Heterosex<br>ual male | MSM            |
| 1                               | 2              | 3              | 4                     | 5              | 6              | 7                     | 8              |
| 36.4%                           | 10.3%          | 53.2%          | 36.4%                 | 10.3%          | 53.2%          | 36.4%                 | 10.3%          |
| 38.6%                           | 13.0%          | 48.4%          | 38.6%                 | 13.0%          | 48.4%          | 38.6%                 | 13.0%          |
| <b>35.0%</b>                    | <b>33.0%</b>   | <b>48.0%</b>   | <b>100.0%</b>         | <b>100.0%</b>  | <b>100.0%</b>  | <b>100.0%</b>         | <b>100.0%</b>  |
| 3.1%                            | 26.0%          | 1.0%           | 1.5%                  | 12.4%          | 1.1%           | 1.5%                  | 12.4%          |
| 0.7%                            | 5.6%           | 1.2%           | 1.5%                  | 12.4%          | 1.1%           | 1.5%                  | 12.4%          |
| <b>4.52</b>                     | <b>4.63</b>    | <b>0.82</b>    | <b>4.52</b>           | <b>4.63</b>    | <b>0.82</b>    | <b>4.52</b>           | <b>4.63</b>    |
| 1.5%                            | 12.4%          | 1.1%           | 1.5%                  | 12.4%          | 1.1%           | 1.5%                  | 12.4%          |
| 96%                             | 90%            | 50%            | 100%                  | 100%           | 100%           | 100%                  | 100%           |
| 5%                              | 25%            | 2%             | 1.5%                  | 12.4%          | 1.1%           | 1.5%                  | 12.4%          |
| 95%                             | 95%            | 95%            | 100%                  | 100%           | 100%           | 100%                  | 100%           |
| 50%                             | 50%            | 50%            | 100%                  | 100%           | 100%           | 100%                  | 100%           |
| <b>515,094</b>                  | <b>145,863</b> | <b>779,085</b> | <b>515,094</b>        | <b>145,863</b> | <b>779,085</b> | <b>515,094</b>        | <b>145,863</b> |
| 18%                             | 26%            | 10%            | 18%                   | 26%            | 10%            | 18%                   | 26%            |
| 95%                             | 95%            | 95%            | 95%                   | 95%            | 95%            | 0%                    | 0%             |
| 135                             | 135            | 135            | 135                   | 135            | 135            | 135                   | 135            |
| 104                             | 104            | 104            | 104                   | 104            | 104            | 104                   | 104            |
| 1                               | 1              | 1              | 2                     | 2              | 2              | 3                     | 3              |
| 2                               | 2              | 2              | 2                     | 2              | 2              | 2                     | 2              |
| 25                              | 25             | 25             | 25                    | 25             | 25             | 25                    | 25             |

| Female         | Simplified model parameters (live calculation) |                |                | Baseline model parameters |                |
|----------------|------------------------------------------------|----------------|----------------|---------------------------|----------------|
|                | Heterosexual male                              | MSM            | Female         | Heterosexual male         | MSM            |
| <b>9</b>       | <b>90</b>                                      | <b>91</b>      | <b>92</b>      | <b>100</b>                | <b>200</b>     |
| 53.2%          | 36.4%                                          | 10.3%          | 53.2%          | 36.4%                     | 10.3%          |
| 48.4%          | 38.6%                                          | 13.0%          | 48.4%          | 38.6%                     | 13.0%          |
| <b>100.0%</b>  | <b>35.0%</b>                                   | <b>33.0%</b>   | <b>48.0%</b>   | <b>35.0%</b>              | <b>33.0%</b>   |
| 1.1%           | 3.1%                                           | 26.0%          | 1.0%           | 3.1%                      | 26.0%          |
| 1.1%           | 0.7%                                           | 5.6%           | 1.2%           | 0.7%                      | 5.6%           |
| <b>0.82</b>    | <b>4.52</b>                                    | <b>4.63</b>    | <b>0.82</b>    | <b>4.5</b>                | <b>4.6</b>     |
| 1.1%           | 1.5%                                           | 12.4%          | 1.1%           | 1.5%                      | 12.4%          |
| 100%           | 96%                                            | 90%            | 50%            | 96%                       | 90%            |
| 1.1%           | 5%                                             | 25%            | 2%             | 5%                        | 25%            |
| 100%           | 100%                                           | 100%           | 100%           | 100%                      | 100%           |
| 100%           | 100%                                           | 100%           | 100%           | 100%                      | 100%           |
| <b>779,085</b> | <b>515,094</b>                                 | <b>145,863</b> | <b>779,085</b> | <b>515,094</b>            | <b>145,863</b> |
| 10%            | 0%                                             | 0%             | 0%             | 5%                        | 30%            |
| 0%             | 95%                                            | 95%            | 95%            | 95%                       | 95%            |
| 135            | 135                                            | 135            | 135            | <b>160</b>                | <b>160</b>     |
| 104            | 104                                            | 104            | 104            | <b>120</b>                | <b>120</b>     |
| 3              | 1                                              | 1              | 1              | 1                         | 1              |
| 2              | 2                                              | 2              | 2              | 2                         | 2              |
| <b>25</b>      | <b>25</b>                                      | <b>25</b>      | <b>25</b>      | <b>25</b>                 | <b>25</b>      |

View Only

| eters (live    | England 2014 numbers   |                |                | Source          |
|----------------|------------------------|----------------|----------------|-----------------|
| Female         | Heterosexu<br>al male  | MSM            | Female         |                 |
| <b>300</b>     |                        |                |                |                 |
| 53.2%          | <b>515,094</b>         | <b>145,863</b> | <b>779,085</b> | <b>PHE 2014</b> |
| 48.4%          | <b>143,244</b>         | <b>48,206</b>  | <b>210,843</b> | <b>PHE 2014</b> |
| <b>48.0%</b>   | 180,283                | 48,135         | 373,961        |                 |
| 1.0%           | 5,538                  | 12,529         | 3,600          |                 |
| 1.2%           | 2,277                  | 5,500          | 4,779          |                 |
| <b>0.82</b>    |                        |                |                |                 |
| 1.1%           | <b>7,815</b>           | <b>18,029</b>  | <b>8,379</b>   | <b>GRASP</b>    |
| 50%            | <b>5,317</b>           | <b>11,276</b>  | <b>1,800</b>   |                 |
| 2%             | <b>8,766</b>           | <b>11,878</b>  | <b>9,112</b>   |                 |
| 100%           | guess from clinics     |                |                |                 |
| 100%           |                        |                |                |                 |
| <b>779,085</b> |                        |                |                |                 |
| 5%             |                        |                |                |                 |
| 95%            |                        |                |                |                 |
| <b>160</b>     | check PBR tariff costs |                |                |                 |
| <b>120</b>     | check PBR tariff costs |                |                |                 |
| 1              |                        |                |                |                 |
| 2              |                        |                |                |                 |
| 25             |                        |                |                |                 |

For peer review only

**Weblink**

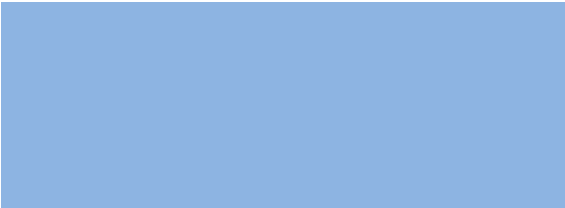

[https://www.gov.uk/government/uploads/syste](https://www.gov.uk/government/uploads/system/uploads/attachment_data/file/111111)

[https://www.gov.uk/government/uploads/syste](https://www.gov.uk/government/uploads/system/uploads/attachment_data/file/111111)

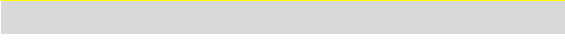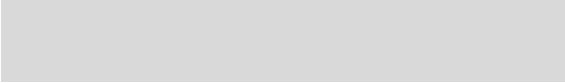

[https://www.gov.uk/government/uploads/syste](https://www.gov.uk/government/uploads/system/uploads/attachment_data/file/111111)

Review only

1  
2  
3  
4  
5  
6  
7  
8  
9  
10  
11  
12  
13  
14  
15  
16  
17  
18  
19  
20  
21  
22  
23  
24  
25  
26  
27  
28  
29  
30  
31  
32  
33  
34  
35  
36  
37  
38  
39  
40  
41  
42  
43  
44  
45  
46  
47  
48  
49  
50  
51  
52  
53  
54  
55  
56  
57  
58  
59  
60

1  
2  
3  
4  
5  
6  
7  
8  
9  
10  
11  
12  
13  
14  
15  
16  
17  
18  
19  
20  
21  
22  
23  
24  
25  
26  
27  
28  
29  
30  
31  
32  
33  
34  
35  
36  
37  
38  
39  
40  
41  
42  
43  
44  
45  
46  
47  
48  
49  
50  
51  
52  
53  
54  
55  
56  
57  
58  
59  
60

**Comments**

**Other info**

Total sexual health screens 2014 (including gonorrhoea tests)  
New episodes of STI 2014  
MSTIC data based on Cath Mercer study (as reported in 533 Men, 731 Women, 98 MSM)

[http://www.bmj.com/uploads/attachment\\_data/file/476582/GRASP\\_2014\\_report\\_final\\_111115.pdf](http://www.bmj.com/uploads/attachment_data/file/476582/GRASP_2014_report_final_111115.pdf)  
% of true symptomatic infections are correctly treated presumptively on basis of symptoms/mi

Peer review only

1  
2  
3  
4  
5  
6  
7  
8  
9  
10  
11  
12  
13  
14  
15  
16  
17  
18  
19  
20  
21  
22  
23  
24  
25  
26  
27  
28  
29  
30  
31  
32  
33  
34  
35  
36  
37  
38  
39  
40  
41  
42  
43  
44  
45  
46  
47  
48  
49  
50  
51  
52  
53  
54  
55  
56  
57  
58  
59  
60

For peer review only

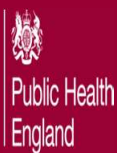

Table 4 (a): Number of all STI diagnoses &amp; services in England

*Data type: service data*

| New STI diagnoses                           |                                    |                                                                                                                    |
|---------------------------------------------|------------------------------------|--------------------------------------------------------------------------------------------------------------------|
| Chancroid / LGV / Donovanosis               | C1, C2, C3                         | <b>Male (total)</b><br>- Heterosexual<br>- MSM<br><b>Female (total)</b><br>- Heterosexual<br>- WSW<br><b>Total</b> |
| Chlamydia - total <sup>1</sup>              | -                                  | <b>Male (total)</b><br>- Heterosexual<br>- MSM<br><b>Female (total)</b><br>- Heterosexual<br>- WSW<br><b>Total</b> |
| <sup>1</sup> Chlamydia - GUM services       | C4°, C4A~, C4B°, C4C~              | <b>Male (total)</b><br>- Heterosexual<br>- MSM<br><b>Female (total)</b><br>- Heterosexual<br>- WSW<br><b>Total</b> |
| <sup>1</sup> Chlamydia - community services | -                                  | <b>Male (total)</b><br>- Heterosexual<br>- MSM<br><b>Female (total)</b><br>- Heterosexual<br>- WSW<br><b>Total</b> |
| Gonorrhoea                                  | B°, B1~, B2~, B5~                  | <b>Male (total)</b><br>- Heterosexual<br>- MSM<br><b>Female (total)</b><br>- Heterosexual<br>- WSW<br><b>Total</b> |
| Herpes: anogenital herpes (1st episode)     | C10A                               | <b>Male (total)</b><br>- Heterosexual<br>- MSM<br><b>Female (total)</b><br>- Heterosexual<br>- WSW<br><b>Total</b> |
| HIV: new diagnosis - total <sup>2 **</sup>  | H1°, H1A°, H1B°, E1A~, E2A~, E3A1~ | <b>Male (total)</b><br>- Heterosexual<br>- MSM<br><b>Female (total)</b><br>- Heterosexual<br>- WSW                 |



|                                                                      |                |                                                                                                                    |
|----------------------------------------------------------------------|----------------|--------------------------------------------------------------------------------------------------------------------|
|                                                                      |                | <b>Total</b>                                                                                                       |
| <sup>2</sup> HIV: new diagnosis<br>- acute infections **             | H1A°           | <b>Male (total)</b><br>- Heterosexual<br>- MSM<br><b>Female (total)</b><br>- Heterosexual<br>- WSW<br><b>Total</b> |
| <sup>2</sup> HIV: new diagnosis<br>- AIDS defined **                 | H1B°, E3A1~    | <b>Male (total)</b><br>- Heterosexual<br>- MSM<br><b>Female (total)</b><br>- Heterosexual<br>- WSW<br><b>Total</b> |
| Molluscum contagiosum **                                             | C12            | <b>Male (total)</b><br>- Heterosexual<br>- MSM<br><b>Female (total)</b><br>- Heterosexual<br>- WSW<br><b>Total</b> |
| Non-specific genital infection<br>(NSGI)                             | C4N°, C4H~     | <b>Male (total)</b><br>- Heterosexual<br>- MSM<br><b>Female (total)</b><br>- Heterosexual<br>- WSW<br><b>Total</b> |
| <b>New STI diagnoses (continued)</b>                                 |                |                                                                                                                    |
| Pelvic inflammatory disease (PID)<br>& epididymitis: non-specific ** | C5A°, C5~      | <b>Male (total)</b><br>- Heterosexual<br>- MSM<br><b>Female (total)</b><br>- Heterosexual<br>- WSW<br><b>Total</b> |
| Chlamydial PID & epididymitis<br>(included in chlamydia total)       | C5A°+C4°, C4B~ | <b>Male (total)</b><br>- Heterosexual<br>- MSM<br><b>Female (total)</b><br>- Heterosexual<br>- WSW<br><b>Total</b> |
| Gonococcal PID & epididymitis<br>(included in gonorrhoea total)      | C5A°+B°, B5    | <b>Male (total)</b><br>- Heterosexual<br>- MSM<br><b>Female (total)</b><br>- Heterosexual<br>- WSW<br><b>Total</b> |
| Scabies / pediculosis pubis **                                       | C8, C9         | <b>Male (total)</b><br>- Heterosexual<br>- MSM<br><b>Female (total)</b><br>- Heterosexual<br>- WSW<br><b>Total</b> |

|                                                      |                  |                                                                                                                    |
|------------------------------------------------------|------------------|--------------------------------------------------------------------------------------------------------------------|
| Syphilis: primary, secondary,<br>& early latent      | A1, A2, A3       | <b>Male (total)</b><br>- Heterosexual<br>- MSM<br><b>Female (total)</b><br>- Heterosexual<br>- WSW<br><b>Total</b> |
| Trichomoniasis                                       | C6A              | <b>Male (total)</b><br>- Heterosexual<br>- MSM<br><b>Female (total)</b><br>- Heterosexual<br>- WSW<br><b>Total</b> |
| Warts: anogenital warts<br>(1st episode)             | C11A             | <b>Male (total)</b><br>- Heterosexual<br>- MSM<br><b>Female (total)</b><br>- Heterosexual<br>- WSW<br><b>Total</b> |
| <b>Other STI diagnoses</b>                           |                  |                                                                                                                    |
| Epidemiological treatment of<br>suspected chlamydia  | C4E~             | <b>Male (total)</b><br>- Heterosexual<br>- MSM<br><b>Female (total)</b><br>- Heterosexual<br>- WSW<br><b>Total</b> |
| Epidemiological treatment of<br>suspected gonorrhoea | B4~              | <b>Male (total)</b><br>- Heterosexual<br>- MSM<br><b>Female (total)</b><br>- Heterosexual<br>- WSW<br><b>Total</b> |
| Epidemiological treatment of<br>NSGI                 | C4I~             | <b>Male (total)</b><br>- Heterosexual<br>- MSM<br><b>Female (total)</b><br>- Heterosexual<br>- WSW<br><b>Total</b> |
| Epidemiological treatment of<br>suspected syphilis   | A9~              | <b>Male (total)</b><br>- Heterosexual<br>- MSM<br><b>Female (total)</b><br>- Heterosexual<br>- WSW<br><b>Total</b> |
| Herpes: anogenital herpes<br>(recurrent episode)     | C10B             | <b>Male (total)</b><br>- Heterosexual<br>- MSM<br><b>Female (total)</b><br>- Heterosexual<br>- WSW<br><b>Total</b> |
| HIV: subsequent presentation                         | H2°, E1B~, E2B~, | <b>Male (total)</b>                                                                                                |

|                                              |                     |                                                                                                                    |
|----------------------------------------------|---------------------|--------------------------------------------------------------------------------------------------------------------|
|                                              | E3A2°, E3B°         | - Heterosexual<br>- MSM<br><b>Female (total)</b><br>- Heterosexual<br>- WSW<br><b>Total</b>                        |
| Ophthalmia neonatorum                        | C5B°, B3°, C4D°     | <b>Male (total)</b><br>- Heterosexual<br>- MSM<br><b>Female (total)</b><br>- Heterosexual<br>- WSW<br><b>Total</b> |
| <b>Other STI diagnoses (continued)</b>       |                     |                                                                                                                    |
| Syphilis: congenital syphilis aged under 2   | A7A°, A7°           | <b>Male (total)</b><br>- Heterosexual<br>- MSM<br><b>Female (total)</b><br>- Heterosexual<br>- WSW<br><b>Total</b> |
| Syphilis: congenital syphilis aged 2 or over | A7A°, A8°           | <b>Male (total)</b><br>- Heterosexual<br>- MSM<br><b>Female (total)</b><br>- Heterosexual<br>- WSW<br><b>Total</b> |
| Syphilis: late                               | A4, A5, A6          | <b>Male (total)</b><br>- Heterosexual<br>- MSM<br><b>Female (total)</b><br>- Heterosexual<br>- WSW<br><b>Total</b> |
| Warts: anogenital warts (recurrent episode)  | C11D°, C11B°, C11C° | <b>Male (total)</b><br>- Heterosexual<br>- MSM<br><b>Female (total)</b><br>- Heterosexual<br>- WSW<br><b>Total</b> |
| <b>Other GUM services diagnoses</b>          |                     |                                                                                                                    |
| Candidosis: anogenital                       | C7°, C7A°           | <b>Male (total)</b><br>- Heterosexual<br>- MSM<br><b>Female (total)</b><br>- Heterosexual<br>- WSW<br><b>Total</b> |
| Cervical cytology: minor abnormality         | P4A                 | <b>Male (total)</b><br>- Heterosexual<br>- MSM<br><b>Female (total)</b><br>- Heterosexual<br>- WSW<br><b>Total</b> |
| Cervical cytology:                           | P4B                 | <b>Male (total)</b>                                                                                                |

|                                                                           |                                      |                                                                                                                    |
|---------------------------------------------------------------------------|--------------------------------------|--------------------------------------------------------------------------------------------------------------------|
| major abnormality                                                         |                                      | - Heterosexual<br>- MSM<br><b>Female (total)</b><br>- Heterosexual<br>- WSW<br><b>Total</b>                        |
| Epidemiological treatment of candidosis, vaginosis, vaginitis & balanitis | C7B <sup>~</sup>                     | <b>Male (total)</b><br>- Heterosexual<br>- MSM<br><b>Female (total)</b><br>- Heterosexual<br>- WSW<br><b>Total</b> |
| Hepatitis A: acute infection                                              | C15 <sup>°</sup>                     | <b>Male (total)</b><br>- Heterosexual<br>- MSM<br><b>Female (total)</b><br>- Heterosexual<br>- WSW<br><b>Total</b> |
| Hepatitis B: first diagnosis                                              | C13 <sup>°</sup> , C13A <sup>~</sup> | <b>Male (total)</b><br>- Heterosexual<br>- MSM<br><b>Female (total)</b><br>- Heterosexual<br>- WSW<br><b>Total</b> |
| Hepatitis C: first diagnosis                                              | C14                                  | <b>Male (total)</b><br>- Heterosexual<br>- MSM<br><b>Female (total)</b><br>- Heterosexual<br>- WSW<br><b>Total</b> |
| Other conditions requiring treatment at GUM                               | D2B                                  | <b>Male (total)</b><br>- Heterosexual<br>- MSM<br><b>Female (total)</b><br>- Heterosexual<br>- WSW<br><b>Total</b> |
| Urinary tract infection                                                   | D2A                                  | <b>Male (total)</b><br>- Heterosexual<br>- MSM<br><b>Female (total)</b><br>- Heterosexual<br>- WSW<br><b>Total</b> |
| Vaginosis / vaginitis / balanitis                                         | C6B, C6C                             | <b>Male (total)</b><br>- Heterosexual<br>- MSM<br><b>Female (total)</b><br>- Heterosexual<br>- WSW<br><b>Total</b> |
| <b>Services provided</b>                                                  |                                      |                                                                                                                    |
| Cervical cytology performed                                               | P4 <sup>°</sup>                      | <b>Male (total)</b><br>- Heterosexual                                                                              |

|                                                                   |           |                       |
|-------------------------------------------------------------------|-----------|-----------------------|
|                                                                   |           | - MSM                 |
|                                                                   |           | <b>Female (total)</b> |
|                                                                   |           | - Heterosexual        |
|                                                                   |           | - WSW                 |
|                                                                   |           | <b>Total</b>          |
| Contraception<br>(excluding condom provision)                     | P3        | <b>Male (total)</b>   |
|                                                                   |           | - Heterosexual        |
|                                                                   |           | - MSM                 |
|                                                                   |           | <b>Female (total)</b> |
|                                                                   |           | - Heterosexual        |
|                                                                   |           | - WSW                 |
|                                                                   |           | <b>Total</b>          |
| Hepatitis B immune<br>(not included in 'Total services provided') | P2I°      | <b>Male (total)</b>   |
|                                                                   |           | - Heterosexual        |
|                                                                   |           | - MSM                 |
|                                                                   |           | <b>Female (total)</b> |
|                                                                   |           | - Heterosexual        |
|                                                                   |           | - WSW                 |
|                                                                   |           | <b>Total</b>          |
| Hepatitis B vaccination: 1st dose                                 | P2A°, P2° | <b>Male (total)</b>   |
|                                                                   |           | - Heterosexual        |
|                                                                   |           | - MSM                 |
|                                                                   |           | <b>Female (total)</b> |
|                                                                   |           | - Heterosexual        |
|                                                                   |           | - WSW                 |
|                                                                   |           | <b>Total</b>          |
| Hepatitis B vaccination: 2nd dose                                 | P2B°      | <b>Male (total)</b>   |
|                                                                   |           | - Heterosexual        |
|                                                                   |           | - MSM                 |
|                                                                   |           | <b>Female (total)</b> |
|                                                                   |           | - Heterosexual        |
|                                                                   |           | - WSW                 |
|                                                                   |           | <b>Total</b>          |
| Hepatitis B vaccination: 3rd dose                                 | P2C°      | <b>Male (total)</b>   |
|                                                                   |           | - Heterosexual        |
|                                                                   |           | - MSM                 |
|                                                                   |           | <b>Female (total)</b> |
|                                                                   |           | - Heterosexual        |
|                                                                   |           | - WSW                 |
|                                                                   |           | <b>Total</b>          |
| HPV vaccination: 1st dose                                         | W1°       | <b>Male (total)</b>   |
|                                                                   |           | - Heterosexual        |
|                                                                   |           | - MSM                 |
|                                                                   |           | <b>Female (total)</b> |
|                                                                   |           | - Heterosexual        |
|                                                                   |           | - WSW                 |
|                                                                   |           | <b>Total</b>          |
| HPV vaccination: 2nd dose                                         | W2°       | <b>Male (total)</b>   |
|                                                                   |           | - Heterosexual        |
|                                                                   |           | - MSM                 |
|                                                                   |           | <b>Female (total)</b> |
|                                                                   |           | - Heterosexual        |
|                                                                   |           | - WSW                 |
|                                                                   |           | <b>Total</b>          |
| HPV vaccination: 3rd dose                                         | W3°       | <b>Male (total)</b>   |
|                                                                   |           | - Heterosexual        |

|                                                                                              |       |                       |
|----------------------------------------------------------------------------------------------|-------|-----------------------|
|                                                                                              |       | - MSM                 |
|                                                                                              |       | <b>Female (total)</b> |
|                                                                                              |       | - Heterosexual        |
|                                                                                              |       | - WSW                 |
|                                                                                              |       | <b>Total</b>          |
| Other episodes not requiring treatment                                                       | D3    | <b>Male (total)</b>   |
|                                                                                              |       | - Heterosexual        |
|                                                                                              |       | - MSM                 |
|                                                                                              |       | <b>Female (total)</b> |
|                                                                                              |       | - Heterosexual        |
|                                                                                              |       | - WSW                 |
|                                                                                              |       | <b>Total</b>          |
| Partner notification: chlamydia                                                              | PNC°  | <b>Male (total)</b>   |
|                                                                                              |       | - Heterosexual        |
|                                                                                              |       | - MSM                 |
|                                                                                              |       | <b>Female (total)</b> |
|                                                                                              |       | - Heterosexual        |
|                                                                                              |       | - WSW                 |
|                                                                                              |       | <b>Total</b>          |
| Partner notification: gonorrhoea                                                             | PNG°  | <b>Male (total)</b>   |
|                                                                                              |       | - Heterosexual        |
|                                                                                              |       | - MSM                 |
|                                                                                              |       | <b>Female (total)</b> |
|                                                                                              |       | - Heterosexual        |
|                                                                                              |       | - WSW                 |
|                                                                                              |       | <b>Total</b>          |
| Partner notification: HIV                                                                    | PNH°  | <b>Male (total)</b>   |
|                                                                                              |       | - Heterosexual        |
|                                                                                              |       | - MSM                 |
|                                                                                              |       | <b>Female (total)</b> |
|                                                                                              |       | - Heterosexual        |
|                                                                                              |       | - WSW                 |
|                                                                                              |       | <b>Total</b>          |
| Partner notification: syphilis                                                               | PNS°  | <b>Male (total)</b>   |
|                                                                                              |       | - Heterosexual        |
|                                                                                              |       | - MSM                 |
|                                                                                              |       | <b>Female (total)</b> |
|                                                                                              |       | - Heterosexual        |
|                                                                                              |       | - WSW                 |
|                                                                                              |       | <b>Total</b>          |
| <b>Services provided (continued)</b>                                                         |       |                       |
| Post exposure prophylaxis (sexual exposure)                                                  | PEPS° | <b>Male (total)</b>   |
|                                                                                              |       | - Heterosexual        |
|                                                                                              |       | - MSM                 |
|                                                                                              |       | <b>Female (total)</b> |
|                                                                                              |       | - Heterosexual        |
|                                                                                              |       | - WSW                 |
|                                                                                              |       | <b>Total</b>          |
| Testing: chlamydia tests (total) <sup>3</sup><br>(not included in 'Total services provided') | -     | <b>Male (total)</b>   |
|                                                                                              |       | - Heterosexual        |
|                                                                                              |       | - MSM                 |
|                                                                                              |       | <b>Female (total)</b> |
|                                                                                              |       | - Heterosexual        |
|                                                                                              |       | - WSW                 |
|                                                                                              |       | <b>Total</b>          |
| <sup>3</sup> Chlamydia tests - GUM services<br>(not included in 'Total services provided')   | -     | <b>Male (total)</b>   |
|                                                                                              |       | - Heterosexual        |
|                                                                                              |       | - MSM                 |

|                                                                                        |                         |                                                                                                                    |
|----------------------------------------------------------------------------------------|-------------------------|--------------------------------------------------------------------------------------------------------------------|
| Chlamydia tests from GUM services are not equal to the sum of source KC60/SHHAPT codes |                         | <b>Female (total)</b><br>- Heterosexual<br>- WSW<br><b>Total</b>                                                   |
| <sup>3</sup> Chlamydia tests - community services                                      | -                       | <b>Male (total)</b><br>- Heterosexual<br>- MSM<br><b>Female (total)</b><br>- Heterosexual<br>- WSW<br><b>Total</b> |
| Testing: chlamydia test                                                                | T1°                     | <b>Male (total)</b><br>- Heterosexual<br>- MSM<br><b>Female (total)</b><br>- Heterosexual<br>- WSW<br><b>Total</b> |
| Testing: HIV tests (total)<br>(not included in 'Total services provided')              | -                       | <b>Male (total)</b><br>- Heterosexual<br>- MSM<br><b>Female (total)</b><br>- Heterosexual<br>- WSW<br><b>Total</b> |
| HIV tests total are not equal to the sum of source KC60/SHHAPT codes                   |                         | <b>Male (total)</b><br>- Heterosexual<br>- MSM<br><b>Female (total)</b><br>- Heterosexual<br>- WSW<br><b>Total</b> |
| Testing: HIV test                                                                      | P1A                     | <b>Male (total)</b><br>- Heterosexual<br>- MSM<br><b>Female (total)</b><br>- Heterosexual<br>- WSW<br><b>Total</b> |
| Testing: HIV test offered & refused                                                    | P1B                     | <b>Male (total)</b><br>- Heterosexual<br>- MSM<br><b>Female (total)</b><br>- Heterosexual<br>- WSW<br><b>Total</b> |
| Testing: HIV test not appropriate                                                      | P1C°                    | <b>Male (total)</b><br>- Heterosexual<br>- MSM<br><b>Female (total)</b><br>- Heterosexual<br>- WSW<br><b>Total</b> |
| <b>Services provided (continued)</b>                                                   |                         |                                                                                                                    |
| Testing: sexual health screens <sup>4</sup>                                            | S1~, S2°, T2°, T3°, T4° | <b>Male (total)</b><br>- Heterosexual<br>- MSM<br><b>Female (total)</b><br>- Heterosexual<br>- WSW<br><b>Total</b> |
| <sup>4</sup> without HIV test                                                          | S1~                     | <b>Male (total)</b><br>- Heterosexual<br>- MSM<br><b>Female (total)</b>                                            |

|                                                    |                 |                                                  |
|----------------------------------------------------|-----------------|--------------------------------------------------|
|                                                    |                 | - Heterosexual<br>- WSW                          |
|                                                    |                 | <b>Total</b>                                     |
| <sup>4</sup> with HIV test                         | S2 <sup>~</sup> | <b>Male (total)</b><br>- Heterosexual<br>- MSM   |
|                                                    |                 | <b>Female (total)</b><br>- Heterosexual<br>- WSW |
|                                                    |                 | <b>Total</b>                                     |
| <sup>4</sup> chlamydia & gonorrhoea                | T2 <sup>°</sup> | <b>Male (total)</b><br>- Heterosexual<br>- MSM   |
|                                                    |                 | <b>Female (total)</b><br>- Heterosexual<br>- WSW |
|                                                    |                 | <b>Total</b>                                     |
| <sup>4</sup> chlamydia, gonorrhoea & syphilis      | T3 <sup>°</sup> | <b>Male (total)</b><br>- Heterosexual<br>- MSM   |
|                                                    |                 | <b>Female (total)</b><br>- Heterosexual<br>- WSW |
|                                                    |                 | <b>Total</b>                                     |
| <sup>4</sup> chlamydia, gonorrhoea, syphilis & HIV | T4 <sup>°</sup> | <b>Male (total)</b><br>- Heterosexual<br>- MSM   |
|                                                    |                 | <b>Female (total)</b><br>- Heterosexual<br>- WSW |
|                                                    |                 | <b>Total</b>                                     |
| <b>Total new STI diagnoses</b>                     |                 | <b>Male (total)</b><br>- Heterosexual<br>- MSM   |
|                                                    |                 | <b>Female (total)</b><br>- Heterosexual<br>- WSW |
|                                                    |                 | <b>Total</b>                                     |
| <b>Total other STI diagnoses</b>                   |                 | <b>Male (total)</b><br>- Heterosexual<br>- MSM   |
|                                                    |                 | <b>Female (total)</b><br>- Heterosexual<br>- WSW |
|                                                    |                 | <b>Total</b>                                     |
| <b>Total other GUM services diagnoses</b>          |                 | <b>Male (total)</b><br>- Heterosexual<br>- MSM   |
|                                                    |                 | <b>Female (total)</b><br>- Heterosexual<br>- WSW |
|                                                    |                 | <b>Total</b>                                     |
| <b>Total services provided</b>                     |                 | <b>Male (total)</b><br>- Heterosexual            |



- MSM  
**Female** (total)  
- Heterosexual  
- WSW  
**Total**

**Data for chlamydia, 'Total new STI diagnoses' & 'Total services provided' from 2012 onwards are not comparable (please see 'notes' section for further details).**

Increases in numbers by sexual risk may be the result of improved data reporting (primarily affecting 2010-2011).

~ KC60 code retired during 2011.

° SHHAPT code introduced during 2011.

\*\* STI diagnoses (including HIV) not exclusively transmitted by sexual contact.

For peer review only

## and by gender & sexual risk, 2010 - 2014

Published 23/06/2015

|  | 2010           | 2011           | 2012           | 2013           | 2014           |
|--|----------------|----------------|----------------|----------------|----------------|
|  | <b>419</b>     | <b>385</b>     | <b>354</b>     | <b>476</b>     | <b>674</b>     |
|  | 47             | 57             | 58             | 43             | 59             |
|  | 331            | 309            | 288            | 424            | 603            |
|  | <b>74</b>      | <b>96</b>      | <b>60</b>      | <b>77</b>      | <b>78</b>      |
|  | 59             | 82             | 55             | 74             | 76             |
|  | 0              | 3              | 2              | 0              | 0              |
|  | <b>493</b>     | <b>481</b>     | <b>414</b>     | <b>553</b>     | <b>753</b>     |
|  | <b>76,985</b>  | <b>77,427</b>  | <b>85,986</b>  | <b>85,434</b>  | <b>85,106</b>  |
|  | -              | -              | -              | -              | -              |
|  | -              | -              | -              | -              | -              |
|  | <b>111,924</b> | <b>109,875</b> | <b>119,548</b> | <b>120,719</b> | <b>120,008</b> |
|  | -              | -              | -              | -              | -              |
|  | -              | -              | -              | -              | -              |
|  | <b>189,400</b> | <b>187,664</b> | <b>207,797</b> | <b>207,851</b> | <b>206,774</b> |
|  | <b>48,018</b>  | <b>52,049</b>  | <b>51,542</b>  | <b>53,630</b>  | <b>55,807</b>  |
|  | 37,578         | 41,317         | 41,036         | 42,774         | 42,664         |
|  | 5,349          | 7,644          | 8,215          | 9,118          | 11,468         |
|  | <b>46,080</b>  | <b>50,048</b>  | <b>45,870</b>  | <b>48,642</b>  | <b>51,045</b>  |
|  | 40,998         | 46,430         | 43,649         | 46,868         | 49,237         |
|  | 85             | 185            | 100            | 88             | 87             |
|  | <b>94,152</b>  | <b>102,117</b> | <b>97,425</b>  | <b>102,289</b> | <b>106,865</b> |
|  | <b>28,967</b>  | <b>25,378</b>  | <b>34,444</b>  | <b>31,804</b>  | <b>29,299</b>  |
|  | -              | -              | -              | -              | -              |
|  | -              | -              | -              | -              | -              |
|  | <b>65,844</b>  | <b>59,827</b>  | <b>73,678</b>  | <b>72,077</b>  | <b>68,963</b>  |
|  | -              | -              | -              | -              | -              |
|  | -              | -              | -              | -              | -              |
|  | <b>95,248</b>  | <b>85,547</b>  | <b>110,372</b> | <b>105,562</b> | <b>99,909</b>  |
|  | <b>11,634</b>  | <b>15,081</b>  | <b>18,583</b>  | <b>21,751</b>  | <b>26,575</b>  |
|  | 5,362          | 6,166          | 7,070          | 7,500          | 7,815          |
|  | 4,938          | 7,860          | 10,768         | 13,629         | 18,029         |
|  | <b>5,198</b>   | <b>6,007</b>   | <b>6,992</b>   | <b>7,664</b>   | <b>8,379</b>   |
|  | 4,498          | 5,309          | 6,563          | 7,260          | 7,999          |
|  | 12             | 36             | 37             | 46             | 29             |
|  | <b>16,843</b>  | <b>21,090</b>  | <b>25,576</b>  | <b>29,419</b>  | <b>34,958</b>  |
|  | <b>11,582</b>  | <b>11,926</b>  | <b>12,094</b>  | <b>12,277</b>  | <b>11,889</b>  |
|  | 9,349          | 9,981          | 10,405         | 10,567         | 10,030         |
|  | 1,019          | 1,264          | 1,233          | 1,339          | 1,474          |
|  | <b>18,101</b>  | <b>19,226</b>  | <b>19,770</b>  | <b>20,069</b>  | <b>19,883</b>  |
|  | 16,191         | 18,002         | 18,946         | 19,378         | 19,210         |
|  | 55             | 106            | 75             | 94             | 78             |
|  | <b>29,698</b>  | <b>31,154</b>  | <b>31,864</b>  | <b>32,349</b>  | <b>31,777</b>  |
|  | <b>3,031</b>   | <b>3,330</b>   | <b>3,088</b>   | <b>3,112</b>   | <b>3,247</b>   |
|  | 962            | 1,066          | 929            | 934            | 868            |
|  | 1,621          | 2,001          | 1,991          | 2,053          | 2,276          |
|  | <b>1,314</b>   | <b>1,232</b>   | <b>1,042</b>   | <b>958</b>     | <b>907</b>     |
|  | 1,093          | 1,073          | 979            | 913            | 871            |
|  | 7              | 13             | 10             | 6              | 3              |

|    |               |               |               |               |               |
|----|---------------|---------------|---------------|---------------|---------------|
| 1  |               |               |               |               |               |
| 2  |               |               |               |               |               |
| 3  | <b>4,347</b>  | <b>4,562</b>  | <b>4,131</b>  | <b>4,071</b>  | <b>4,155</b>  |
| 4  | -             | 242           | 240           | 226           | 219           |
| 5  | -             | 44            | 39            | 56            | 42            |
| 6  | -             | 177           | 185           | 159           | 168           |
| 7  | -             | 57            | 53            | 54            | 36            |
| 8  | -             | 45            | 43            | 49            | 35            |
| 9  | -             | 0             | 2             | 1             | 0             |
| 10 | -             | 299           | 293           | 280           | 255           |
| 11 | <b>171</b>    | <b>270</b>    | <b>220</b>    | <b>194</b>    | <b>204</b>    |
| 12 | 90            | 155           | 129           | 120           | 104           |
| 13 | 60            | 95            | 81            | 70            | 94            |
| 14 | <b>86</b>     | <b>132</b>    | <b>106</b>    | <b>91</b>     | <b>85</b>     |
| 15 | 77            | 120           | 100           | 86            | 80            |
| 16 | 0             | 0             | 1             | 0             | 0             |
| 17 | <b>257</b>    | <b>402</b>    | <b>326</b>    | <b>285</b>    | <b>289</b>    |
| 18 | <b>8,825</b>  | <b>8,594</b>  | <b>8,267</b>  | <b>7,852</b>  | <b>7,473</b>  |
| 19 | 7,558         | 7,732         | 7,572         | 7,230         | 6,842         |
| 20 | 295           | 324           | 337           | 355           | 405           |
| 21 | <b>3,783</b>  | <b>3,618</b>  | <b>3,617</b>  | <b>3,425</b>  | <b>3,141</b>  |
| 22 | 3,386         | 3,376         | 3,453         | 3,280         | 3,026         |
| 23 | 11            | 22            | 8             | 12            | 16            |
| 24 | <b>12,617</b> | <b>12,213</b> | <b>11,886</b> | <b>11,279</b> | <b>10,616</b> |
| 25 | <b>49,720</b> | <b>49,269</b> | <b>46,586</b> | <b>41,775</b> | <b>39,175</b> |
| 26 | 40,634        | 40,553        | 39,556        | 35,230        | 32,545        |
| 27 | 4,796         | 5,770         | 5,523         | 5,314         | 5,417         |
| 28 | <b>6,064</b>  | <b>7,335</b>  | <b>7,058</b>  | <b>6,834</b>  | <b>7,073</b>  |
| 29 | 5,507         | 7,045         | 6,733         | 6,565         | 6,804         |
| 30 | 17            | 34            | 26            | 40            | 26            |
| 31 | <b>55,824</b> | <b>56,615</b> | <b>53,649</b> | <b>48,612</b> | <b>46,249</b> |
| 32 | <b>2010</b>   | <b>2011</b>   | <b>2012</b>   | <b>2013</b>   | <b>2014</b>   |
| 33 | <b>6,500</b>  | <b>6,372</b>  | <b>6,584</b>  | <b>6,820</b>  | <b>6,650</b>  |
| 34 | 5,223         | 5,402         | 5,651         | 5,888         | 5,681         |
| 35 | 647           | 697           | 736           | 758           | 818           |
| 36 | <b>14,979</b> | <b>15,608</b> | <b>14,356</b> | <b>13,830</b> | <b>13,745</b> |
| 37 | 13,653        | 14,849        | 13,775        | 13,384        | 13,391        |
| 38 | 35            | 78            | 36            | 25            | 34            |
| 39 | <b>21,493</b> | <b>21,982</b> | <b>20,943</b> | <b>20,653</b> | <b>20,397</b> |
| 40 | <b>763</b>    | <b>508</b>    | <b>493</b>    | <b>564</b>    | <b>517</b>    |
| 41 | 570           | 415           | 427           | 497           | 452           |
| 42 | 114           | 68            | 51            | 56            | 58            |
| 43 | <b>2,060</b>  | <b>1,777</b>  | <b>1,633</b>  | <b>1,602</b>  | <b>1,550</b>  |
| 44 | 1,860         | 1,699         | 1,567         | 1,558         | 1,513         |
| 45 | 2             | 7             | 5             | 2             | 2             |
| 46 | <b>2,823</b>  | <b>2,285</b>  | <b>2,126</b>  | <b>2,166</b>  | <b>2,067</b>  |
| 47 | <b>154</b>    | <b>117</b>    | <b>113</b>    | <b>139</b>    | <b>139</b>    |
| 48 | 74            | 66            | 60            | 76            | 67            |
| 49 | 65            | 45            | 46            | 59            | 68            |
| 50 | <b>246</b>    | <b>300</b>    | <b>314</b>    | <b>324</b>    | <b>350</b>    |
| 51 | 217           | 277           | 295           | 311           | 338           |
| 52 | 0             | 0             | 1             | 2             | 0             |
| 53 | <b>400</b>    | <b>417</b>    | <b>427</b>    | <b>463</b>    | <b>489</b>    |
| 54 | <b>1,755</b>  | <b>1,844</b>  | <b>2,211</b>  | <b>2,079</b>  | <b>1,956</b>  |
| 55 | 962           | 1,150         | 1,374         | 1,277         | 1,125         |
| 56 | 558           | 598           | 745           | 727           | 772           |
| 57 | <b>229</b>    | <b>260</b>    | <b>332</b>    | <b>257</b>    | <b>204</b>    |
| 58 | 202           | 240           | 315           | 235           | 199           |
| 59 | 0             | 0             | 4             | 2             | 1             |
| 60 | <b>1,985</b>  | <b>2,106</b>  | <b>2,543</b>  | <b>2,336</b>  | <b>2,162</b>  |

1  
2  
3  
4  
5  
6  
7  
8  
9  
10  
11  
12  
13  
14  
15  
16  
17  
18  
19  
20  
21  
22  
23  
24  
25  
26  
27  
28  
29  
30  
31  
32  
33  
34  
35  
36  
37  
38  
39  
40  
41  
42  
43  
44  
45  
46  
47  
48  
49  
50  
51  
52  
53  
54  
55  
56  
57  
58  
59  
60

|  |               |               |               |               |               |
|--|---------------|---------------|---------------|---------------|---------------|
|  | <b>2,351</b>  | <b>2,634</b>  | <b>2,698</b>  | <b>2,953</b>  | <b>4,054</b>  |
|  | 472           | 478           | 470           | 491           | 480           |
|  | 1,618         | 2,036         | 2,129         | 2,375         | 3,477         |
|  | <b>292</b>    | <b>291</b>    | <b>261</b>    | <b>283</b>    | <b>263</b>    |
|  | 259           | 250           | 239           | 255           | 243           |
|  | 3             | 6             | 8             | 7             | 2             |
|  | <b>2,647</b>  | <b>2,927</b>  | <b>2,959</b>  | <b>3,236</b>  | <b>4,317</b>  |
|  | <b>353</b>    | <b>489</b>    | <b>475</b>    | <b>472</b>    | <b>561</b>    |
|  | 269           | 400           | 445           | 439           | 524           |
|  | 37            | 44            | 7             | 9             | 11            |
|  | <b>5,180</b>  | <b>5,791</b>  | <b>6,159</b>  | <b>6,006</b>  | <b>5,911</b>  |
|  | 4,279         | 5,069         | 5,828         | 5,676         | 5,626         |
|  | 18            | 15            | 11            | 17            | 20            |
|  | <b>5,536</b>  | <b>6,282</b>  | <b>6,635</b>  | <b>6,479</b>  | <b>6,473</b>  |
|  | <b>40,895</b> | <b>41,600</b> | <b>40,392</b> | <b>41,028</b> | <b>39,349</b> |
|  | 34,011        | 36,134        | 35,632        | 36,535        | 34,611        |
|  | 2,657         | 3,004         | 3,120         | 3,156         | 3,456         |
|  | <b>34,659</b> | <b>34,935</b> | <b>33,493</b> | <b>32,834</b> | <b>31,251</b> |
|  | 30,968        | 32,672        | 31,929        | 31,601        | 30,055        |
|  | 122           | 228           | 148           | 173           | 152           |
|  | <b>75,604</b> | <b>76,549</b> | <b>73,891</b> | <b>73,869</b> | <b>70,612</b> |
|  | <b>27,337</b> | <b>7,916</b>  | -             | -             | -             |
|  | 21,042        | 6,795         | -             | -             | -             |
|  | 3,277         | 962           | -             | -             | -             |
|  | <b>18,222</b> | <b>5,190</b>  | -             | -             | -             |
|  | 16,266        | 5,095         | -             | -             | -             |
|  | 51            | 26            | -             | -             | -             |
|  | <b>45,592</b> | <b>13,109</b> | -             | -             | -             |
|  | <b>4,957</b>  | <b>1,409</b>  | -             | -             | -             |
|  | 2,448         | 737           | -             | -             | -             |
|  | 1,921         | 628           | -             | -             | -             |
|  | <b>2,775</b>  | <b>752</b>    | -             | -             | -             |
|  | 2,432         | 735           | -             | -             | -             |
|  | 8             | 1             | -             | -             | -             |
|  | <b>7,736</b>  | <b>2,163</b>  | -             | -             | -             |
|  | <b>5,827</b>  | <b>1,587</b>  | -             | -             | -             |
|  | 4,546         | 1,347         | -             | -             | -             |
|  | 728           | 222           | -             | -             | -             |
|  | <b>11,641</b> | <b>3,046</b>  | -             | -             | -             |
|  | 10,546        | 3,004         | -             | -             | -             |
|  | 13            | 7             | -             | -             | -             |
|  | <b>17,470</b> | <b>4,634</b>  | -             | -             | -             |
|  | <b>904</b>    | <b>242</b>    | -             | -             | -             |
|  | 173           | 40            | -             | -             | -             |
|  | 617           | 191           | -             | -             | -             |
|  | <b>147</b>    | <b>23</b>     | -             | -             | -             |
|  | 121           | 22            | -             | -             | -             |
|  | 0             | 0             | -             | -             | -             |
|  | <b>1,051</b>  | <b>265</b>    | -             | -             | -             |
|  | <b>8,772</b>  | <b>9,861</b>  | <b>10,195</b> | <b>10,501</b> | <b>10,457</b> |
|  | 7,023         | 8,137         | 8,655         | 8,965         | 8,853         |
|  | 788           | 1,111         | 1,125         | 1,204         | 1,314         |
|  | <b>11,888</b> | <b>13,115</b> | <b>14,417</b> | <b>15,000</b> | <b>15,366</b> |
|  | 10,515        | 12,164        | 13,781        | 14,536        | 14,908        |
|  | 36            | 80            | 41            | 42            | 62            |
|  | <b>20,679</b> | <b>22,981</b> | <b>24,613</b> | <b>25,502</b> | <b>25,826</b> |
|  | <b>43,601</b> | <b>83,910</b> | <b>78,508</b> | <b>78,244</b> | <b>77,954</b> |

|    |               |                |                |                |                |
|----|---------------|----------------|----------------|----------------|----------------|
| 1  |               |                |                |                |                |
| 2  |               |                |                |                |                |
| 3  | 13,692        | 26,989         | 28,199         | 26,685         | 25,143         |
| 4  | 24,646        | 52,754         | 47,640         | 47,790         | 50,021         |
| 5  | <b>23,042</b> | <b>45,482</b>  | <b>45,021</b>  | <b>43,261</b>  | <b>38,821</b>  |
| 6  | 20,988        | 41,825         | 42,986         | 40,623         | 37,209         |
| 7  | 89            | 698            | 148            | 130            | 138            |
| 8  | <b>66,664</b> | <b>129,399</b> | <b>123,531</b> | <b>121,505</b> | <b>116,776</b> |
| 9  | 1             | 1              | 0              | 0              | 0              |
| 10 | -             | -              | -              | -              | -              |
| 11 | -             | -              | -              | -              | -              |
| 12 | 1             | 0              | 0              | 1              | 1              |
| 13 | -             | -              | -              | -              | -              |
| 14 | -             | -              | -              | -              | -              |
| 15 | 2             | 1              | 0              | 1              | 1              |
| 16 | <b>2010</b>   | <b>2011</b>    | <b>2012</b>    | <b>2013</b>    | <b>2014</b>    |
| 17 | 0             | 0              | 0              | 0              | 0              |
| 18 | -             | -              | -              | -              | -              |
| 19 | 0             | 0              | 0              | 0              | 0              |
| 20 | -             | -              | -              | -              | -              |
| 21 | -             | -              | -              | -              | -              |
| 22 | 0             | 0              | 0              | 0              | 0              |
| 23 | 0             | 2              | 4              | 0              | 4              |
| 24 | -             | -              | -              | -              | -              |
| 25 | -             | -              | -              | -              | -              |
| 26 | 3             | 2              | 3              | 3              | 11             |
| 27 | -             | -              | -              | -              | -              |
| 28 | 3             | 4              | 7              | 3              | 15             |
| 29 | <b>1,066</b>  | <b>1,187</b>   | <b>1,173</b>   | <b>1,260</b>   | <b>1,220</b>   |
| 30 | 578           | 671            | 691            | 662            | 586            |
| 31 | 337           | 432            | 420            | 534            | 590            |
| 32 | <b>677</b>    | <b>693</b>     | <b>653</b>     | <b>650</b>     | <b>637</b>     |
| 33 | 588           | 605            | 599            | 598            | 605            |
| 34 | 1             | 7              | 0              | 2              | 1              |
| 35 | <b>1,748</b>  | <b>1,880</b>   | <b>1,826</b>   | <b>1,912</b>   | <b>1,858</b>   |
| 36 | <b>36,201</b> | <b>38,803</b>  | <b>39,685</b>  | <b>41,124</b>  | <b>41,409</b>  |
| 37 | 30,182        | 33,719         | 34,884         | 36,675         | 36,521         |
| 38 | 2,745         | 3,065          | 3,099          | 3,218          | 3,660          |
| 39 | <b>20,853</b> | <b>22,431</b>  | <b>21,847</b>  | <b>22,057</b>  | <b>21,794</b>  |
| 40 | 18,909        | 21,106         | 20,828         | 21,367         | 21,013         |
| 41 | 79            | 165            | 114            | 121            | 124            |
| 42 | <b>57,090</b> | <b>61,254</b>  | <b>61,536</b>  | <b>63,182</b>  | <b>63,208</b>  |
| 43 | <b>9,166</b>  | <b>9,739</b>   | <b>9,867</b>   | <b>9,224</b>   | <b>9,423</b>   |
| 44 | 7,326         | 8,241          | 8,647          | 8,166          | 8,223          |
| 45 | 630           | 807            | 900            | 856            | 943            |
| 46 | <b>72,183</b> | <b>77,727</b>  | <b>80,217</b>  | <b>78,790</b>  | <b>77,374</b>  |
| 47 | 64,369        | 72,804         | 77,433         | 76,314         | 75,111         |
| 48 | 185           | 412            | 251            | 249            | 253            |
| 49 | <b>81,422</b> | <b>87,477</b>  | <b>90,087</b>  | <b>88,019</b>  | <b>86,804</b>  |
| 50 | -             | -              | -              | -              | -              |
| 51 | -             | -              | -              | -              | -              |
| 52 | -             | -              | -              | -              | -              |
| 53 | <b>1,285</b>  | <b>1,638</b>   | <b>1,696</b>   | <b>1,944</b>   | <b>1,688</b>   |
| 54 | 1,192         | 1,603          | 1,645          | 1,880          | 1,637          |
| 55 | 1             | 6              | 6              | 10             | 5              |
| 56 | <b>1,285</b>  | <b>1,638</b>   | <b>1,696</b>   | <b>1,944</b>   | <b>1,688</b>   |
| 57 | -             | -              | -              | -              | -              |
| 58 |               |                |                |                |                |
| 59 |               |                |                |                |                |
| 60 |               |                |                |                |                |

1  
2  
3  
4  
5  
6  
7  
8  
9  
10  
11  
12  
13  
14  
15  
16  
17  
18  
19  
20  
21  
22  
23  
24  
25  
26  
27  
28  
29  
30  
31  
32  
33  
34  
35  
36  
37  
38  
39  
40  
41  
42  
43  
44  
45  
46  
47  
48  
49  
50  
51  
52  
53  
54  
55  
56  
57  
58  
59  
60

|         |         |         |         |         |
|---------|---------|---------|---------|---------|
| -       | -       | -       | -       | -       |
| -       | -       | -       | -       | -       |
| 204     | 226     | 277     | 502     | 515     |
| 199     | 218     | 273     | 495     | 509     |
| 0       | 2       | 1       | 1       | 3       |
| 204     | 226     | 277     | 502     | 515     |
| 4,559   | 1,070   | -       | -       | -       |
| 3,888   | 1,027   | -       | -       | -       |
| 177     | 32      | -       | -       | -       |
| 6,271   | 1,769   | -       | -       | -       |
| 5,613   | 1,731   | -       | -       | -       |
| 16      | 8       | -       | -       | -       |
| 10,835  | 2,840   | -       | -       | -       |
| -       | 13      | 12      | 4       | 80      |
| -       | 7       | 7       | 3       | 5       |
| -       | 5       | 5       | 1       | 75      |
| -       | 6       | 4       | 3       | 4       |
| -       | 6       | 4       | 3       | 4       |
| -       | 0       | 0       | 0       | 0       |
| -       | 19      | 16      | 7       | 84      |
| 794     | 974     | 946     | 885     | 920     |
| 599     | 749     | 757     | 693     | 730     |
| 98      | 129     | 120     | 115     | 142     |
| 381     | 504     | 489     | 474     | 471     |
| 335     | 451     | 446     | 420     | 446     |
| 2       | 8       | 3       | 4       | 4       |
| 1,176   | 1,479   | 1,435   | 1,359   | 1,391   |
| 754     | 828     | 711     | 742     | 722     |
| 510     | 586     | 501     | 466     | 385     |
| 175     | 212     | 174     | 233     | 311     |
| 249     | 267     | 378     | 271     | 265     |
| 224     | 256     | 366     | 255     | 252     |
| 1       | 4       | 2       | 2       | 2       |
| 1,003   | 1,095   | 1,089   | 1,013   | 987     |
| 87,725  | 103,129 | 118,027 | 121,144 | 125,185 |
| 59,620  | 73,841  | 86,419  | 87,609  | 88,147  |
| 19,691  | 23,151  | 26,481  | 28,711  | 33,175  |
| 76,035  | 94,333  | 115,236 | 122,011 | 127,539 |
| 68,101  | 87,312  | 109,867 | 116,751 | 122,975 |
| 285     | 555     | 485     | 518     | 515     |
| 163,864 | 197,489 | 233,270 | 243,183 | 252,743 |
| 2,527   | 2,526   | 2,468   | 2,360   | 2,287   |
| 1,774   | 1,849   | 1,861   | 1,784   | 1,641   |
| 437     | 528     | 520     | 508     | 573     |
| 14,601  | 15,904  | 15,518  | 15,064  | 15,580  |
| 12,973  | 14,929  | 14,984  | 14,648  | 15,078  |
| 26      | 108     | 52      | 34      | 43      |
| 17,143  | 18,432  | 17,986  | 17,426  | 17,867  |
| 14,656  | 17,501  | 17,519  | 16,441  | 15,545  |
| 12,816  | 15,360  | 15,624  | 14,659  | 13,681  |
| 822     | 1,296   | 1,294   | 1,347   | 1,390   |
| 97,665  | 107,018 | 107,118 | 103,839 | 100,636 |
| 85,427  | 99,155  | 102,635 | 99,820  | 96,611  |
| 351     | 718     | 529     | 473     | 477     |
| 112,445 | 124,548 | 124,644 | 120,295 | 116,206 |
| 2010    | 2011    | 2012    | 2013    | 2014    |
| -       | -       | -       | -       | -       |
| -       | -       | -       | -       | -       |

|    |               |               |                |                |                |
|----|---------------|---------------|----------------|----------------|----------------|
| 1  |               |               |                |                |                |
| 2  |               |               |                |                |                |
| 3  | -             | -             | -              | -              | -              |
| 4  | -             | <b>9,839</b>  | <b>15,594</b>  | <b>21,554</b>  | <b>24,367</b>  |
| 5  | -             | 9,328         | 14,830         | 20,919         | 23,505         |
| 6  | -             | 73            | 111            | 140            | 134            |
| 7  | -             | <b>9,839</b>  | <b>15,594</b>  | <b>21,554</b>  | <b>24,367</b>  |
| 8  | -             | -             | -              | -              | -              |
| 9  | -             | -             | -              | -              | -              |
| 10 | -             | -             | -              | -              | -              |
| 11 | <b>78,129</b> | <b>97,169</b> | <b>100,725</b> | <b>133,496</b> | <b>176,680</b> |
| 12 | 70,237        | 89,957        | 96,363         | 129,326        | 167,566        |
| 13 | 167           | 335           | 265            | 233            | 293            |
| 14 | <b>78,129</b> | <b>97,169</b> | <b>100,725</b> | <b>133,496</b> | <b>176,680</b> |
| 15 | -             | <b>5,778</b>  | <b>11,280</b>  | <b>12,663</b>  | <b>14,008</b>  |
| 16 | -             | 2,168         | 4,196          | 4,957          | 5,431          |
| 17 | -             | 3,427         | 6,606          | 7,325          | 8,068          |
| 18 | -             | <b>1,892</b>  | <b>3,777</b>   | <b>4,121</b>   | <b>4,988</b>   |
| 19 | -             | 1,766         | 3,484          | 3,846          | 4,683          |
| 20 | -             | 15            | 48             | 49             | 50             |
| 21 | -             | <b>7,675</b>  | <b>15,058</b>  | <b>16,784</b>  | <b>18,997</b>  |
| 22 | <b>18,742</b> | <b>18,516</b> | <b>19,306</b>  | <b>20,540</b>  | <b>22,552</b>  |
| 23 | 6,655         | 6,884         | 7,170          | 7,649          | 8,483          |
| 24 | 9,911         | 10,595        | 11,219         | 12,148         | 13,409         |
| 25 | <b>7,217</b>  | <b>7,154</b>  | <b>7,155</b>   | <b>7,173</b>   | <b>7,461</b>   |
| 26 | 6,192         | 6,478         | 6,535          | 6,687          | 7,080          |
| 27 | 103           | 141           | 111            | 102            | 92             |
| 28 | <b>25,974</b> | <b>25,675</b> | <b>26,463</b>  | <b>27,714</b>  | <b>30,016</b>  |
| 29 | -             | <b>7,937</b>  | <b>13,445</b>  | <b>14,432</b>  | <b>15,778</b>  |
| 30 | -             | 2,870         | 4,809          | 5,376          | 5,741          |
| 31 | -             | 4,495         | 7,884          | 8,597          | 9,594          |
| 32 | -             | <b>3,397</b>  | <b>4,937</b>   | <b>5,313</b>   | <b>5,526</b>   |
| 33 | -             | 3,018         | 4,481          | 4,974          | 5,243          |
| 34 | -             | 62            | 72             | 74             | 59             |
| 35 | -             | <b>11,337</b> | <b>18,383</b>  | <b>19,746</b>  | <b>21,305</b>  |
| 36 | -             | <b>7,096</b>  | <b>11,422</b>  | <b>12,339</b>  | <b>13,676</b>  |
| 37 | -             | 2,461         | 4,195          | 4,480          | 4,874          |
| 38 | -             | 4,199         | 6,678          | 7,488          | 8,439          |
| 39 | -             | <b>2,956</b>  | <b>4,275</b>   | <b>4,479</b>   | <b>4,728</b>   |
| 40 | -             | 2,646         | 3,899          | 4,192          | 4,511          |
| 41 | -             | 58            | 59             | 65             | 38             |
| 42 | -             | <b>10,053</b> | <b>15,698</b>  | <b>16,819</b>  | <b>18,404</b>  |
| 43 | -             | <b>51</b>     | <b>104</b>     | <b>231</b>     | <b>329</b>     |
| 44 | -             | 29            | 27             | 29             | 36             |
| 45 | -             | 21            | 77             | 195            | 276            |
| 46 | -             | <b>22</b>     | <b>33</b>      | <b>75</b>      | <b>125</b>     |
| 47 | -             | 21            | 33             | 74             | 118            |
| 48 | -             | 0             | 0              | 0              | 2              |
| 49 | -             | <b>73</b>     | <b>137</b>     | <b>306</b>     | <b>454</b>     |
| 50 | -             | <b>27</b>     | <b>10</b>      | <b>154</b>     | <b>200</b>     |
| 51 | -             | 12            | 6              | 9              | 16             |
| 52 | -             | 15            | 3              | 145            | 181            |
| 53 | -             | <b>16</b>     | <b>20</b>      | <b>43</b>      | <b>75</b>      |
| 54 | -             | 14            | 20             | 42             | 71             |
| 55 | -             | 1             | 0              | 0              | 2              |
| 56 | -             | <b>43</b>     | <b>30</b>      | <b>197</b>     | <b>275</b>     |
| 57 | -             | <b>24</b>     | <b>13</b>      | <b>97</b>      | <b>163</b>     |
| 58 | -             | 10            | 2              | 6              | 18             |
| 59 |               |               |                |                |                |
| 60 |               |               |                |                |                |

1  
2  
3  
4  
5  
6  
7  
8  
9  
10  
11  
12  
13  
14  
15  
16  
17  
18  
19  
20  
21  
22  
23  
24  
25  
26  
27  
28  
29  
30  
31  
32  
33  
34  
35  
36  
37  
38  
39  
40  
41  
42  
43  
44  
45  
46  
47  
48  
49  
50  
51  
52  
53  
54  
55  
56  
57  
58  
59  
60

|                  |                  |                  |                  |                  |
|------------------|------------------|------------------|------------------|------------------|
| -                | 14               | 10               | 90               | 145              |
| -                | 20               | 18               | 29               | 44               |
| -                | 20               | 18               | 28               | 43               |
| -                | 0                | 0                | 0                | 0                |
| -                | 44               | 31               | 126              | 207              |
| <b>302,174</b>   | <b>296,791</b>   | <b>278,723</b>   | <b>280,386</b>   | <b>308,145</b>   |
| 214,452          | 221,849          | 203,784          | 199,539          | 206,964          |
| 44,408           | 54,504           | 60,410           | 66,717           | 88,204           |
| <b>300,830</b>   | <b>299,610</b>   | <b>283,116</b>   | <b>304,381</b>   | <b>346,068</b>   |
| 260,040          | 278,465          | 267,437          | 287,937          | 325,680          |
| 1,129            | 1,687            | 1,644            | 1,613            | 1,480            |
| <b>603,470</b>   | <b>596,476</b>   | <b>562,008</b>   | <b>584,832</b>   | <b>654,280</b>   |
| -                | <b>20,926</b>    | <b>32,605</b>    | <b>34,799</b>    | <b>37,097</b>    |
| -                | 17,069           | 27,647           | 29,727           | 31,003           |
| -                | 2,158            | 3,558            | 3,886            | 4,914            |
| -                | <b>13,386</b>    | <b>20,170</b>    | <b>21,049</b>    | <b>21,099</b>    |
| -                | 12,228           | 19,235           | 20,299           | 20,332           |
| -                | 122              | 77               | 87               | 63               |
| -                | <b>34,318</b>    | <b>52,777</b>    | <b>55,857</b>    | <b>58,207</b>    |
| -                | <b>4,302</b>     | <b>8,229</b>     | <b>9,295</b>     | <b>11,308</b>    |
| -                | 1,638            | 3,037            | 3,223            | 3,671            |
| -                | 2,335            | 4,898            | 5,778            | 7,295            |
| -                | <b>1,965</b>     | <b>2,991</b>     | <b>3,228</b>     | <b>3,376</b>     |
| -                | 1,755            | 2,817            | 3,070            | 3,238            |
| -                | 10               | 25               | 33               | 13               |
| -                | <b>6,267</b>     | <b>11,220</b>    | <b>12,523</b>    | <b>14,686</b>    |
| -                | <b>654</b>       | <b>1,340</b>     | <b>1,592</b>     | <b>1,747</b>     |
| -                | 218              | 441              | 540              | 571              |
| -                | 415              | 877              | 1,018            | 1,150            |
| -                | <b>291</b>       | <b>373</b>       | <b>443</b>       | <b>478</b>       |
| -                | 275              | 362              | 421              | 466              |
| -                | 1                | 4                | 4                | 4                |
| -                | <b>945</b>       | <b>1,713</b>     | <b>2,035</b>     | <b>2,225</b>     |
| -                | <b>939</b>       | <b>1,558</b>     | <b>1,575</b>     | <b>2,208</b>     |
| -                | 226              | 346              | 336              | 353              |
| -                | 678              | 1,166            | 1,193            | 1,814            |
| -                | <b>202</b>       | <b>273</b>       | <b>250</b>       | <b>249</b>       |
| -                | 183              | 257              | 233              | 245              |
| -                | 7                | 6                | 5                | 2                |
| -                | <b>1,141</b>     | <b>1,831</b>     | <b>1,825</b>     | <b>2,457</b>     |
| <b>2010</b>      | <b>2011</b>      | <b>2012</b>      | <b>2013</b>      | <b>2014</b>      |
| -                | <b>3,190</b>     | <b>4,844</b>     | <b>5,365</b>     | <b>7,133</b>     |
| -                | 684              | 974              | 987              | 1,113            |
| -                | 2,388            | 3,763            | 4,243            | 5,880            |
| -                | <b>800</b>       | <b>1,018</b>     | <b>1,049</b>     | <b>1,237</b>     |
| -                | 726              | 940              | 983              | 1,145            |
| -                | 20               | 24               | 22               | 20               |
| -                | <b>3,991</b>     | <b>5,863</b>     | <b>6,414</b>     | <b>8,371</b>     |
| <b>1,185,889</b> | <b>1,078,555</b> | <b>1,146,031</b> | <b>1,098,929</b> | <b>1,090,425</b> |
| -                | -                | -                | -                | -                |
| <b>1,760,361</b> | <b>1,704,900</b> | <b>2,474,840</b> | <b>2,440,094</b> | <b>2,448,643</b> |
| -                | -                | -                | -                | -                |
| -                | -                | -                | -                | -                |
| <b>2,955,508</b> | <b>2,789,919</b> | <b>3,654,722</b> | <b>3,560,707</b> | <b>3,558,841</b> |
| <b>556,929</b>   | <b>589,115</b>   | <b>608,728</b>   | <b>635,065</b>   | <b>668,801</b>   |
| 421,648          | 465,438          | 483,788          | 503,602          | 507,209          |
| 67,898           | 85,363           | 95,877           | 108,839          | 138,277          |



|    |                  |                  |                  |                  |                  |
|----|------------------|------------------|------------------|------------------|------------------|
| 1  |                  |                  |                  |                  |                  |
| 2  |                  |                  |                  |                  |                  |
| 3  |                  |                  |                  |                  |                  |
| 4  | 609,808          | 660,751          | 680,712          | 726,830          | 767,284          |
| 5  | 533,541          | 609,763          | 644,718          | 696,608          | 734,595          |
| 6  | 1,855            | 4,368            | 2,876            | 3,138            | 3,144            |
| 7  | <b>1,167,718</b> | <b>1,250,115</b> | <b>1,289,585</b> | <b>1,362,095</b> | <b>1,436,339</b> |
| 8  | 628,960          | 489,440          | 537,303          | 463,864          | 421,624          |
| 9  | -                | -                | -                | -                | -                |
| 10 | 1,150,553        | 1,044,149        | 1,794,128        | 1,713,264        | 1,681,359        |
| 11 | -                | -                | -                | -                | -                |
| 12 | -                | -                | -                | -                | -                |
| 13 | <b>1,787,790</b> | <b>1,539,804</b> | <b>2,365,137</b> | <b>2,198,612</b> | <b>2,122,502</b> |
| 14 | -                | 4,146            | 4,130            | 3,107            | 1,329            |
| 15 | -                | 3,745            | 3,816            | 2,790            | 1,087            |
| 16 | -                | 271              | 253              | 237              | 177              |
| 17 | -                | 3,957            | 4,014            | 3,925            | 2,400            |
| 18 | -                | 3,790            | 3,839            | 3,817            | 2,068            |
| 19 | -                | 28               | 10               | 11               | 7                |
| 20 | -                | 8,104            | 8,144            | 7,032            | 3,730            |
| 21 | <b>463,091</b>   | <b>494,849</b>   | <b>518,735</b>   | <b>543,475</b>   | <b>567,928</b>   |
| 22 | 352,564          | 387,996          | 405,821          | 423,793          | 428,448          |
| 23 | 68,559           | 82,188           | 92,665           | 103,351          | 124,491          |
| 24 | <b>463,091</b>   | <b>503,685</b>   | <b>522,689</b>   | <b>551,743</b>   | <b>575,756</b>   |
| 25 | 418,846          | 474,674          | 500,222          | 532,377          | 556,928          |
| 26 | 1,829            | 3,033            | 2,224            | 2,334            | 2,241            |
| 27 | <b>926,999</b>   | <b>998,724</b>   | <b>1,041,527</b> | <b>1,095,386</b> | <b>1,143,899</b> |
| 28 | 29,762           | 36,687           | 42,010           | 43,529           | 40,511           |
| 29 | 16,194           | 18,914           | 20,460           | 20,623           | 20,334           |
| 30 | 9,636            | 15,282           | 19,562           | 21,041           | 18,947           |
| 31 | <b>20,275</b>    | <b>24,487</b>    | <b>26,261</b>    | <b>27,166</b>    | <b>28,434</b>    |
| 32 | 17,806           | 22,291           | 24,342           | 25,623           | 27,075           |
| 33 | 164              | 367              | 375              | 332              | 238              |
| 34 | <b>50,056</b>    | <b>61,182</b>    | <b>68,278</b>    | <b>70,707</b>    | <b>68,954</b>    |
| 35 | <b>112,328</b>   | <b>104,850</b>   | <b>101,469</b>   | <b>106,058</b>   | <b>113,859</b>   |
| 36 | 95,043           | 91,708           | 90,996           | 95,996           | 100,319          |
| 37 | 6,869            | 7,377            | 6,363            | 6,746            | 9,093            |
| 38 | <b>161,776</b>   | <b>159,105</b>   | <b>160,562</b>   | <b>194,435</b>   | <b>249,017</b>   |
| 39 | 146,354          | 150,367          | 153,737          | 187,843          | 238,086          |
| 40 | 436              | 780              | 597              | 700              | 780              |
| 41 | <b>274,181</b>   | <b>263,992</b>   | <b>262,056</b>   | <b>300,518</b>   | <b>362,924</b>   |
| 42 | -                | 22,469           | 39,807           | 46,405           | 64,584           |
| 43 | -                | 13,969           | 24,601           | 28,501           | 38,112           |
| 44 | -                | 7,357            | 13,094           | 16,614           | 24,497           |
| 45 | -                | 26,789           | 48,189           | 61,260           | 93,534           |
| 46 | -                | 24,905           | 44,082           | 58,415           | 89,657           |
| 47 | -                | 189              | 283              | 325              | 419              |
| 48 | -                | 49,271           | 88,157           | 107,677          | 158,136          |
| 49 | <b>2010</b>      | <b>2011</b>      | <b>2012</b>      | <b>2013</b>      | <b>2014</b>      |
| 50 | <b>560,015</b>   | <b>590,010</b>   | <b>615,898</b>   | <b>645,319</b>   | <b>684,572</b>   |
| 51 | 423,735          | 464,902          | 487,149          | 508,985          | 515,094          |
| 52 | 68,645           | 86,593           | 99,351           | 113,410          | 145,863          |
| 53 | <b>612,070</b>   | <b>659,957</b>   | <b>688,230</b>   | <b>735,673</b>   | <b>779,085</b>   |
| 54 | 535,663          | 608,991          | 651,929          | 705,121          | 746,307          |
| 55 | 1,870            | 4,373            | 2,894            | 3,169            | 3,181            |
| 56 | <b>1,173,069</b> | <b>1,250,211</b> | <b>1,304,266</b> | <b>1,381,194</b> | <b>1,463,910</b> |
| 57 | 125,537          | 32,924           | -                | -                | -                |
| 58 | 95,640           | 27,379           | -                | -                | -                |
| 59 | 16,706           | 4,779            | -                | -                | -                |
| 60 | <b>168,925</b>   | <b>47,531</b>    | -                | -                | -                |

1  
2  
3  
4  
5  
6  
7  
8  
9  
10  
11  
12  
13  
14  
15  
16  
17  
18  
19  
20  
21  
22  
23  
24  
25  
26  
27  
28  
29  
30  
31  
32  
33  
34  
35  
36  
37  
38  
39  
40  
41  
42  
43  
44  
45  
46  
47  
48  
49  
50  
51  
52  
53  
54  
55  
56  
57  
58  
59  
60

|                  |                  |                  |                  |                  |
|------------------|------------------|------------------|------------------|------------------|
| 150,491          | 46,376           | -                | -                | -                |
| 459              | 188              | -                | -                | -                |
| <b>294,650</b>   | <b>80,469</b>    | -                | -                | -                |
| <b>434,478</b>   | <b>125,875</b>   | -                | -                | -                |
| 328,095          | 106,530          | -                | -                | -                |
| 51,939           | 17,009           | -                | -                | -                |
| <b>443,145</b>   | <b>130,252</b>   | -                | -                | -                |
| 385,172          | 127,222          | -                | -                | -                |
| 1,411            | 636              | -                | -                | -                |
| <b>878,419</b>   | <b>256,199</b>   | -                | -                | -                |
| -                | <b>84,982</b>    | <b>119,291</b>   | <b>123,544</b>   | <b>132,239</b>   |
| -                | 67,374           | 96,445           | 98,950           | 99,890           |
| -                | 10,761           | 17,326           | 20,242           | 27,201           |
| -                | <b>127,467</b>   | <b>185,573</b>   | <b>204,925</b>   | <b>224,974</b>   |
| -                | 115,813          | 175,996          | 196,717          | 214,745          |
| -                | 773              | 707              | 779              | 811              |
| -                | <b>212,496</b>   | <b>304,903</b>   | <b>328,513</b>   | <b>357,258</b>   |
| -                | <b>11,153</b>    | <b>15,545</b>    | <b>16,500</b>    | <b>18,688</b>    |
| -                | 3,536            | 4,191            | 3,928            | 3,889            |
| -                | 7,107            | 10,946           | 12,270           | 14,499           |
| -                | <b>4,573</b>     | <b>4,805</b>     | <b>4,377</b>     | <b>4,797</b>     |
| -                | 4,136            | 4,584            | 4,189            | 4,633            |
| -                | 68               | 46               | 55               | 37               |
| -                | <b>15,727</b>    | <b>20,352</b>    | <b>20,878</b>    | <b>23,487</b>    |
| -                | <b>335,076</b>   | <b>481,062</b>   | <b>505,275</b>   | <b>533,645</b>   |
| -                | 260,083          | 386,513          | 406,107          | 411,315          |
| -                | 46,937           | 71,079           | 80,898           | 104,163          |
| -                | <b>350,134</b>   | <b>497,852</b>   | <b>526,371</b>   | <b>549,314</b>   |
| -                | 315,444          | 471,349          | 504,215          | 526,929          |
| -                | 2,708            | 2,141            | 2,335            | 2,333            |
| -                | <b>685,320</b>   | <b>979,011</b>   | <b>1,031,803</b> | <b>1,083,165</b> |
| <b>214,050</b>   | <b>218,951</b>   | <b>227,318</b>   | <b>226,029</b>   | <b>226,709</b>   |
| 142,427          | 150,436          | 150,198          | 148,908          | 143,244          |
| 23,866           | 31,551           | 35,092           | 39,257           | 48,206           |
| <b>201,797</b>   | <b>204,274</b>   | <b>212,688</b>   | <b>212,956</b>   | <b>210,843</b>   |
| 121,093          | 134,397          | 132,464          | 135,489          | 136,737          |
| 365              | 726              | 465              | 510              | 448              |
| <b>416,487</b>   | <b>423,625</b>   | <b>442,288</b>   | <b>440,707</b>   | <b>439,243</b>   |
| <b>128,666</b>   | <b>144,918</b>   | <b>129,565</b>   | <b>131,129</b>   | <b>131,044</b>   |
| 79,684           | 78,435           | 72,429           | 72,987           | 71,103           |
| 35,059           | 59,365           | 52,284           | 52,746           | 55,585           |
| <b>89,249</b>    | <b>90,734</b>    | <b>81,941</b>    | <b>80,972</b>    | <b>76,630</b>    |
| 80,365           | 84,556           | 78,194           | 77,124           | 73,735           |
| 277              | 984              | 303              | 295              | 325              |
| <b>218,035</b>   | <b>235,690</b>   | <b>211,513</b>   | <b>212,105</b>   | <b>207,684</b>   |
| <b>120,181</b>   | <b>135,780</b>   | <b>149,550</b>   | <b>150,800</b>   | <b>154,162</b>   |
| 86,533           | 101,660          | 113,816          | 113,380          | 112,812          |
| 22,030           | 26,160           | 29,494           | 31,771           | 36,609           |
| <b>268,874</b>   | <b>299,392</b>   | <b>320,933</b>   | <b>322,898</b>   | <b>324,072</b>   |
| 238,433          | 278,465          | 307,653          | 310,586          | 312,623          |
| 867              | 1,821            | 1,329            | 1,291            | 1,302            |
| <b>389,377</b>   | <b>435,243</b>   | <b>470,500</b>   | <b>473,748</b>   | <b>478,285</b>   |
| <b>1,651,981</b> | <b>1,608,055</b> | <b>1,712,216</b> | <b>1,689,087</b> | <b>1,746,815</b> |
| 756,079          | 847,188          | 879,460          | 908,796          | 937,789          |

|                  |                  |                  |                  |                  |
|------------------|------------------|------------------|------------------|------------------|
| 139,469          | 198,697          | 239,166          | 269,546          | 339,878          |
| <b>2,330,850</b> | <b>2,355,271</b> | <b>3,162,082</b> | <b>3,238,285</b> | <b>3,425,342</b> |
| 1,036,292        | 1,215,458        | 1,295,156        | 1,460,004        | 1,662,436        |
| 3,869            | 8,254            | 6,557            | 6,915            | 6,827            |
| <b>3,992,669</b> | <b>3,969,935</b> | <b>4,908,511</b> | <b>4,949,184</b> | <b>5,192,090</b> |

Unable to data from previous years

For peer review only

1  
2  
3  
4  
5  
6  
7  
8  
9  
10  
11  
12  
13  
14  
15  
16  
17  
18  
19  
20  
21  
22  
23  
24  
25  
26  
27  
28  
29  
30  
31  
32  
33  
34  
35  
36  
37  
38  
39  
40  
41  
42  
43  
44  
45  
46  
47  
48  
49  
50  
51  
52  
53  
54  
55  
56  
57  
58  
59  
60

# BMJ Open

**Analysis of the potential for point-of-care test to enable individualised treatment of infections caused by antimicrobial-resistant and susceptible strains of *Neisseria gonorrhoeae***

|                                 |                                                                                                                                                                                                                                                                                                                                                                                                                                                                           |
|---------------------------------|---------------------------------------------------------------------------------------------------------------------------------------------------------------------------------------------------------------------------------------------------------------------------------------------------------------------------------------------------------------------------------------------------------------------------------------------------------------------------|
| Journal:                        | <i>BMJ Open</i>                                                                                                                                                                                                                                                                                                                                                                                                                                                           |
| Manuscript ID                   | bmjopen-2016-015447.R1                                                                                                                                                                                                                                                                                                                                                                                                                                                    |
| Article Type:                   | Research                                                                                                                                                                                                                                                                                                                                                                                                                                                                  |
| Date Submitted by the Author:   | 30-Mar-2017                                                                                                                                                                                                                                                                                                                                                                                                                                                               |
| Complete List of Authors:       | Turner, Katy; Bristol University<br>Christensen, Hannah; University of Bristol, School of Social and Community Medicine<br>Adams, Elisabeth; Aquarius Population Health, Managing Director and Founder<br>McAdams, David ; Duke University, Duke Fuqua School of Business<br>Fifer, Helen; Public Health England Colindale, Bacteriology Reference Department<br>McDonnell, Anthony ; Wellcome Trust<br>Woodford, Neil; Public Health England, National Infection Service |
| <b>Primary Subject Heading</b>: | Infectious diseases                                                                                                                                                                                                                                                                                                                                                                                                                                                       |
| Secondary Subject Heading:      | Diagnostics, Epidemiology, Sexual health                                                                                                                                                                                                                                                                                                                                                                                                                                  |
| Keywords:                       | INFECTIOUS DISEASES, Diagnostic microbiology < INFECTIOUS DISEASES, HEALTH ECONOMICS, SEXUAL MEDICINE, BACTERIOLOGY                                                                                                                                                                                                                                                                                                                                                       |
|                                 |                                                                                                                                                                                                                                                                                                                                                                                                                                                                           |

SCHOLARONE™  
Manuscripts

1  
2  
3 1 **Analysis of the potential for point-of-care test to enable individualised treatment of**  
4 2 **infections caused by antimicrobial-resistant and susceptible strains of *Neisseria***  
5 3 ***gonorrhoeae***  
6 4

7 5 Katy ME Turner, Hannah Christensen, Elisabeth J Adams, David McAdams, Helen Fifer,  
8 6 Anthony McDonnell, Neil Woodford  
9 7

10 8  
11 9 School of Veterinary Sciences, University of Bristol, Langford House, Langford, Bristol BS40  
12 10 5DU, UK  
13 11 Katy ME Turner  
14 12 Senior Lecturer  
15 13

16 14 School of Social and Community Medicine, University of Bristol, Oakfield House, Oakfield  
17 15 Grove, Bristol, BS8 2BN, UK  
18 16 Hannah Christensen  
19 17 Lecturer  
20 18

21 19 Aquarius Population Health, 58a Highgate High Street, London N6 5HX, UK  
22 20 Managing Director and Founder  
23 21 Elisabeth Adams  
24 22

25 23 Duke Fuqua School of Business, 100 Fuqua Drive, A416, Durham, NC 27708, USA  
26 24 Professor of Business Administration and Economics  
27 25 David McAdams  
28 26

29 27 Bacteriology Reference Department, National Infection Service, Public Health England,  
30 28 London, UK  
31 29 Consultant Microbiologist  
32 30 Helen Fifer  
33 31

34 32 The O'Neill Review on Antimicrobial Resistance, Wellcome Trust, London, UK  
35 33 Head of Economic Research  
36 34 Anthony McDonnell  
37 35

38 36 Bacteriology Reference Department, National Infection Service, Public Health England,  
39 37 London, UK  
40 38 Head, AMRHAI Reference Unit  
41 39 and  
42 40 The O'Neill Review on Antimicrobial Resistance, Wellcome Trust, London, UK  
43 41 Scientific Advisor  
44 42 Neil Woodford  
45 43

46 44 Correspondence to:  
47 45 Katy ME Turner  
48 46 E: [katy.turner@bristol.ac.uk](mailto:katy.turner@bristol.ac.uk)  
49 47 T: +44 (0) 117 3314563  
50 48  
51 49

52 50  
53 50 Keywords: point-of-care test; *Neisseria gonorrhoeae*; antimicrobial-resistance  
54 51

55 52 Word count: 3538  
56 53 *Excluding title page, abstract, references, figures and tables.*  
57 54

**Abstract**

**Objective:** To create a mathematical model to investigate the treatment impact and economic implications of introducing an antimicrobial resistance point-of-care test (AMR POCT) for gonorrhoea as a way of extending the life of current last-line treatments.

**Design:** Modelling study.

**Setting:** England.

**Population:** Patients accessing sexual health services.

**Interventions:** Incremental impact of introducing a hypothetical AMR POCT that could detect susceptibility to previous first line antibiotics e.g. ciprofloxacin or penicillin so that patients are given more tailored treatment, compared with the current situation where all patients are given therapy with ceftriaxone and azithromycin. The hypothetical intervention was assessed using a mathematical model developed in Excel. The model included initial and follow-up attendances, loss to follow-up, use of standard or tailored treatment, time taken to treatment and the costs of testing and treatment.

**Main outcome measures:** Number of doses of ceftriaxone saved, mean time to most appropriate treatment, mean number of visits per (infected) patient, number of patients lost to follow-up and total cost of testing.

**Results:** In the current situation an estimated 33,431 ceftriaxone treatments are administered annually and 792 gonococcal infections remain untreated due to loss to follow-up. The use of an AMR POCT for ciprofloxacin could reduce these ceftriaxone treatments by 66%, and for an AMR POCT for penicillin by 79%. The mean time for patients receiving an antibiotic treatment is reduced by 2 days in scenarios including POCT and no positive patients remain untreated through eliminating loss to follow-up. Such POCTs are estimated to add £34 million to testing costs, but this does not take into account reductions in costs of repeat attendances and the reuse of older, cheaper antimicrobials.

**Conclusions:** The introduction of AMR POCT could allow clinicians to discern between the majority of gonorrhoea-positive patients with strains that could be treated with older, previously abandoned first-line treatments, and those requiring our current last-line dual therapy. Such tests could extend the useful life of dual ceftriaxone and azithromycin therapy, thus pushing back the time when gonorrhoea may become untreatable.

## Strengths and weaknesses

- This study uses a simple framework to evaluate the potential impact of point of care tests to diagnose antimicrobial resistant or sensitive gonorrhoea infections
- Parameterised with contemporary UK data on diagnoses, treatment and levels of antimicrobial resistance
- Uses a static model, so not possible to extrapolate future population effects

## INTRODUCTION

Increasing antimicrobial resistant gonorrhoea represents a significant and urgent public health problem. Gonorrhoea, caused by *Neisseria gonorrhoeae* is the second most commonly diagnosed bacterial sexually transmitted infection (STI) in England. *N. gonorrhoeae* has evolved resistance to all major drug classes and has been recognised as a bacterium of international concern by World Health Organization (WHO) <sup>1</sup> and has been prioritised in the UK five-year antimicrobial resistance strategy<sup>2</sup>.

Diagnoses have more than doubled from 16,839 in 2010 to 41,193 in 2015, mainly due to increased diagnoses in men who have sex with men (MSM), accounting for 70% of male infections in 2015, illustrated in Figure 1 <sup>3</sup> (data reported through GUMCADv2, including GUM clinics and other sexual health service providers, but not general practice). Infections are often asymptomatic, especially in women and in pharyngeal and rectal infections in MSM, but are still transmissible<sup>4</sup>. If untreated, complications of infection include pelvic inflammatory disease, infertility, increased risk of pregnancy complications and, in rare cases, life-threatening septicaemia<sup>5</sup>. Gonorrhoea infection also increases the risk of HIV acquisition<sup>6</sup>.

<sup>3</sup>In the UK, the Gonococcal Resistance to Antimicrobial Surveillance Program (GRASP) has performed sentinel antibiotic susceptibility testing of gonorrhoea since 2000<sup>7</sup>. Increases in resistance to first line therapies resulted in two changes in treatment recommendation (Figure 1): from ciprofloxacin to cefixime in 2005 and then to ceftriaxone plus azithromycin in 2011 <sup>7-9</sup>. Our current first-line therapy is also our last-line option, and whilst the use of dual therapy is intended to delay resistance developing to ceftriaxone, decreased susceptibility to either of these drugs could lead to untreatable infections. Whilst new antibiotics are in development, their use in the clinic may be many years away and already the world's first reported clinical treatment failure with confirmed ceftriaxone and azithromycin resistance has occurred <sup>7</sup>.

1  
2  
3 1 There are two main challenges to the management of gonorrhoea which contribute to the  
4 2 problem of resistance, illustrated in Figure 2. 1) Precautionary treatment: at the time of  
5 3 diagnosis, such that all infections are treated as if they are resistant to older antibiotics and  
6 4 2) Epidemiological treatment: sexual contacts of gonorrhoea cases are often treated before  
7 5 diagnostic test results are known resulting in unnecessary treatment of uninfected partners.  
8 6 The cornerstone of gonorrhoea management to date has been to ensure rapid, highly  
9 7 effective treatment is given to prevent the onward spread of infection to sexual partners and  
10 8 to prevent people not returning for treatment following a diagnosis. In the context of antibiotic  
11 9 resistance and new diagnostic technologies, it is necessary to reassess these priorities.

12  
13  
14  
15  
16  
17  
18  
19  
20  
21  
22  
23  
24  
25  
26  
27  
28  
29  
30  
31  
32  
33  
34  
35  
36  
37  
38  
39  
40  
41  
42  
43  
44  
45  
46  
47  
48  
49  
50  
51  
52  
53  
54  
55  
56  
57  
58  
59  
60

11 Strategies are required to extend the life of existing antimicrobials for the successful  
12 treatment of gonorrhoea. Most infections diagnosed in the UK are susceptible to cefixime,  
13 ciprofloxacin and even penicillin<sup>7</sup>. Therefore, if a point-of-care test (POCT) could be  
14 developed to test for resistance (or susceptibility) to antibiotics, most patients could be  
15 treated with an older oral first-line therapy, potentially extending the life of ceftriaxone as our  
16 last-line therapy.<sup>10</sup> A promising option based on existing nucleic acid amplification test  
17 (NAAT) could be a PCR test for ciprofloxacin resistance, using the *gyrA* Gene as a target  
18<sup>10,11</sup>. Other technologies could involve direct measurement of live cell responses to the  
19 presence of a panel of antibiotics including microfluidic devices, atomic force microscopy,  
20 volatile chemical detection or mass spectroscopy. Computational approaches based on *in*  
21 *silico* phenotyping based on genotype may also be able to detect new mutations more  
22 rapidly than traditional microbiological testing<sup>12-14</sup>. In this study we developed a  
23 mathematical model to investigate the treatment impact and economic implications of  
24 introducing an antimicrobial resistance (AMR) POCT for gonorrhoea.

## 41 METHODS

### 42 Model

43  
44 We developed a decision tree model in Excel to consider the impact of a hypothetical new  
45 AMR POCT on testing, diagnosis and treatment of gonorrhoea in sexual health clinics in  
46 England (Figure 3), compared to current practice. Genitourinary clinics typically triage  
47 attending patients based on whether they have symptoms or report contact with a sexual  
48 partner infected with a specific infection (“same day management”) and those without  
49 symptoms (“delayed management”) where treatment is delayed until the results of diagnostic  
50 tests are returned from the laboratory (2-7 days) (Figure 2). Current practice is therefore a  
51 mixture of same day management and delayed management depending on clinic patient  
52 mix. Guidelines recommend that patients treated for gonorrhoea also have swabs taken at  
53 the time of treatment that are sent for susceptibility testing, but these results are not



1 available until after treatment has been given. The alternative strategy is based on a point of  
2 care gonorrhoea diagnostic test for all patients. The point of care test (POCT) could be either  
3 a simple diagnostic for gonorrhoea (infected/not infected) or a test which can discriminate  
4 between one specific resistance/susceptibility determinants (POCT AMR). Simple POCT  
5 tests are commercially available and have been piloted in clinic<sup>15</sup> but POCT AMR tests are  
6 still in development. More complex testing algorithms and diagnostic technologies could be  
7 envisioned, for example only using an AMR POCT if the initial simple POCT is positive  
8 (reflex testing) or using more complex algorithms and new technologies to determine optimal  
9 treatment options. In this preliminary example we consider two options of antimicrobial  
10 susceptibility 1) ciprofloxacin and 2) penicillin.<sup>16,17</sup>

11  
12 The model was based upon an existing pathway model used to investigate the impact of  
13 introducing a dual POCT for gonorrhoea and chlamydia in a genitourinary medicine (GUM)  
14 setting<sup>17,18</sup>, but simplified in that onward transmission of gonorrhoea and partner notification  
15 were not included, with the focus being on diagnosis and tailored treatment, shown in Figure  
16 3 for MSM patient group (corresponding pathways for heterosexual men and women are  
17 given in the Appendix Figure A1 A-D). We explicitly included branches to differentiate  
18 susceptible and resistant isolates within the pathway framework. For the purpose of our  
19 study, we assumed that all point of care tests have equivalent sensitivity and specificity to  
20 current PCR laboratory tests. Previous models have considered variable specificity and  
21 sensitivity requirements in more detail<sup>16</sup>.

22  
23 Hypothetical cohorts of patients were followed through the pathway (MSM, heterosexual  
24 men and heterosexual women). Individuals could either receive same-day management or  
25 delayed management (Figure 3) under current practice or for POCT pathway all patients are  
26 assumed tested, diagnosed and treated on the same day. The only difference between  
27 POCT and AMR POCT is therefore in the choice of antimicrobial therapy. Treatments  
28 modelled were either our current last-line dual therapy of ceftriaxone and azithromycin  
29 (current pathway or simple POCT), or in the case of scenarios including AMR POCT a  
30 proportion of patients were provided with either ciprofloxacin or penicillin, plus azithromycin  
31 co-therapy, as an alternative regimen where possible. Loss to follow-up when patients were  
32 recalled for treatment following laboratory testing to determine positivity for gonorrhoea was  
33 explicitly included for current pathway only. We assumed that results of point of care  
34 diagnostics can be provided within the clinical consultation, e.g. if patients provide samples  
35 for testing on arrival at a GUM clinic and then wait for an appointment or return later in the  
36 day. It is possible that this would result in delays to treatment for symptomatic individuals  
37 and sexual contacts, but we do not consider this further.

## Parameter values

Full model parameters are provided in the Appendix Table A1 and Table A2. Estimates of the numbers of patients attending GUM clinics and tested for and diagnosed with gonorrhoea were based on recent data from Public Health England (PHE)<sup>19</sup>. The model is run assuming 515,094 MSW, 145,863 MSM and 779,085 women attend a GUM clinic in 2014)<sup>19</sup> and the proportions entering same day management or who are infected adjusted to generate the observed diagnoses of gonorrhoea in each group. In 2014, there were over 33,000 diagnoses of gonorrhoea reported by PHE, just over half in men who have sex with men (MSM) and the remaining heterosexual cases split roughly equally between men and women. We combined data on patients presenting as contacts of gonorrhoea cases or with symptoms into the “same-day management” pathway. Asymptomatic patients were tested, but treatment was assumed to be delayed until the results of laboratory tests were known. We distributed infected patients between the pathways according to specific parameters for each patient group based on the probability of being infected and the likelihood of having symptoms. Symptomatic patients are more likely to be managed on the same day as testing and heterosexual men (MSW) are the most likely to be symptomatic, followed by MSM, then women. (Data from the Maximising STI Control trial, personal communication Cath Mercer) (Table 1)<sup>17,18,20</sup>. These parameters were informed by national PHE data where available and supplemented with additional data or clinical experience and are described fully elsewhere<sup>17,20</sup>. The difference between MSM and MSW may be due to a combination of factors including higher probability of extra-genital infection, higher incidence of repeat infections and higher probability of HIV coinfection and higher frequency of STI testing in this group.<sup>21</sup> We estimated the proportions of infections that are resistant to ciprofloxacin and/or penicillin from the GRASP 2014 report (Table A1), which included systematic susceptibility testing at the PHE reference laboratory from sentinel surveillance sites and a larger but less well defined analysis of samples tested locally<sup>22</sup>. Parameters were varied to be appropriate to three patient groups: heterosexual men, MSM, and women. In the baseline case we assumed that all confirmed and presumptive gonorrhoea infections are treated with ceftriaxone and azithromycin because there is >5% resistance to alternative regimens, resulting in 100% of infections treated as if they are resistant to other antibiotics (such as ciprofloxacin). The cost for patients attending GUM were taken from the latest payment by results tariff<sup>23</sup>. An AMR POCT is not currently available so we assumed conservatively that separate new tests for assessing resistance to either ciprofloxacin or penicillin would each incur an additional £25 testing cost, similar to that previously assumed for a PCR based POCT test<sup>17</sup>

## Management scenarios

We considered the following scenarios for each of the three patient groups (MSM, heterosexual men and women).

- 1) Current management – clinicians have no knowledge of the resistance profile of gonorrhoea at the point of initial treatment and consequently all patients are treated with ceftriaxone and azithromycin. Some patients are managed on the same day, either due to symptoms and positive microscopy or as contacts of infected individuals, others wait for lab results, resulting in some unnecessary treatment and some delays to treatment or loss to follow-up. (Figure 2)
- 2) Simple POCT management – all patients tested and managed same day but all treated as if resistant to older antibiotics (i.e. ceftriaxone and azithromycin)
- 3) AMR POCT management - all patients tested with AMR POCT for gonorrhoea that could identify infections that do not need to be treated with ceftriaxone
  - a. assuming current ciprofloxacin resistance prevalence<sup>22</sup>. (Figure 2)
  - b. assuming current penicillin resistance prevalence<sup>22</sup>.

## Economic analysis

The primary outcomes were: the number of doses of ceftriaxone saved; and the mean time to appropriate treatment. In addition, we calculated the average number of visits per person and per infected person, the total cost of testing and the number of patients lost to follow up. In each case we compared the incremental benefit of an AMR POCT with current testing practice. Analyses were undertaken from the NHS perspective with costs measured in pounds sterling at 2014 prices.

## RESULTS

We modelled a snapshot of GUM attendance, gonorrhoea diagnosis and prevalence of resistance to ciprofloxacin and penicillin based on the situation in England, 2014<sup>19</sup>. Under current treatment guidelines for 1.4 million people attending GUM per year we estimate 33,431 ceftriaxone treatments are currently administered annually and 792 gonococcal infections remain untreated due to loss to follow-up. In those receiving antibiotics, the mean time to treatment was estimated to be 2.2 days. Under current practice, 68% (MSW), 63% (MSM) and 21% (Women) who are infected with gonorrhoea are treated on the same day as they attend. The mean number of attendances at clinic per infected person was 1.44. We estimated the total cost of current testing to be £196 million. If a POCT test is used (strategies 2-4), this enables same-day testing and treatment, patients would only need to visit once, all infected individuals would be treated on the same day as the test and therefore no infected individuals would be lost to follow-up and left untreated.

1  
2  
3  
4  
5  
6  
7  
8  
9  
10  
11  
12  
13  
14  
15  
16  
17  
18  
19  
20  
21  
22  
23  
24  
25  
26  
27  
28  
29  
30  
31  
32  
33  
34  
35  
36  
37  
38  
39  
40  
41  
42  
43  
44  
45  
46  
47  
48  
49  
50  
51  
52  
53  
54  
55  
56  
57  
58  
59  
60

1  
2 The results for AMR POCT (strategy 3, 4) and POCT (strategy 2) only differ by the choice of  
3 treatment regimen. If an AMR POCT for ciprofloxacin resistance were available (strategy 3a)  
4 we estimate its use could prevent 22,054 treatments of ceftriaxone annually (a 66%  
5 reduction) assuming the current levels of resistance to ciprofloxacin (37% of infections in  
6 2014<sup>24</sup>,

1  
2  
3 1 Table 1). Similarly an AMR POCT for penicillin resistance (strategy 3b) at the current levels  
4 of resistance (23% overall) could prevent 26,499 ceftriaxone treatments annually (a 79%  
5 reduction). Assuming an AMR POCT added £25 to the testing costs we estimated the total  
6 cost of testing for each of the POCT scenarios to be £230 million, adding £34 million to the  
7 annual cost of testing.  
8  
9

## 10 11 12 **DISCUSSION**

### 13 **Statement of principal findings**

14  
15 Our model estimates that 66% of the 33,431 ceftriaxone treatments given annually to  
16 individuals with gonorrhoea could be replaced by ciprofloxacin, thus extending the life of our  
17 current last-line treatment, if an AMR POCT for ciprofloxacin resistance was available. If an  
18 AMR POCT for penicillin was available, 79% of ceftriaxone treatments could be substituted  
19 with penicillin. The use of POCTs would mean a two day reduction in the time that people  
20 wait, on average, for appropriate treatment compared with current practice and such testing  
21 would prevent the approximately 800 positive individuals who remain untreated in the current  
22 system due to loss to follow-up. If AMR POCT added £25 to first-line testing costs, we  
23 estimate the use of such tests would increase current treatment and testing costs by £34  
24 million annually. The outcomes related to same day diagnosis and treatment (reduced time  
25 to treatment and reduced follow up) could be achieved by using a simple POCT, as  
26 previously considered<sup>17</sup>. The additional benefit of AMR POCT test is to enable tailored  
27 choice of antimicrobial treatment.  
28  
29

### 30 **Strengths and weaknesses of the study**

31  
32 Our model used recent published data on antimicrobial resistance levels, gonococcal  
33 incidence and current treatment and considered the impact of additional AMR POCT in  
34 distinct population groups, namely heterosexual men, MSM and females. The simplified  
35 model structure, which is available freely online, enables the parameters to be easily  
36 updated and the impact of different scenarios, in different settings, to be considered. We  
37 made the simplifying assumption that the cost of an AMR POCT would add £25 to the  
38 current tariff cost; however, in reality other current activities might be reduced or  
39 discontinued if an AMR POCT was available, such as testing, microscopy, culture and  
40 physical exams or re-attendances, as well as reduced costs associated with re-using  
41 cheaper oral antibiotics. New DNA-based POCT technologies may be able to be combined  
42 to produce a multiplexed test, which may be more economically viable than the separate  
43 specific AMR tests we modelled here. Our cost estimates are therefore likely to be higher  
44 than in practice. New technologies are emerging which may be able to rapidly determine the  
45 bacterial response to a panel of potential antibiotics which would enable highly tailored  
46  
47  
48  
49  
50  
51  
52  
53  
54  
55  
56  
57  
58  
59  
60

1  
2  
3 1 therapy without the need to continuously monitor the efficacy of a test for resistance based  
4 on detecting DNA sequence, but for this preliminary exploration we selected a hypothetical  
5 AMR POCT test which could integrate with existing POCT technologies based on nucleic  
6 acid amplification.  
7  
8  
9

10  
11 6 The model did not capture the indirect effects of reduced transmission to partners or  
12 progression to complications, such as pelvic inflammatory disease and epididymitis. It also  
13 did not consider the longer term effects of changing treatment strategy on the evolution of  
14 drug resistance over time in gonorrhoea infections.  
15  
16  
17

### 18 **Strengths and weaknesses in relation to other studies, discussing important** 19 **differences in results**

20  
21 13 To our knowledge, no-one has specifically addressed the question of the added value of a  
22 point-of-care AMR POCT to discriminate between susceptible and resistant strains to guide  
23 initial treatment decisions for gonorrhoea. Others have considered in detail the relative  
24 benefits of POCTs, balancing the need for fast results against cost and test performance<sup>16</sup>.  
25 Adams et al previously showed that a dual chlamydia/gonorrhoea point of care NAAT  
26 diagnostic test pathway could be cost neutral or cost-saving compared with existing methods  
27 even though the test kit itself is more expensive.<sup>17,18</sup> We initially assumed that the POCT  
28 AMR is an additional test cost, however it is probable that a multiplex PCR rapid test could  
29 be designed to include an AMR component which does not compromise the cost or  
30 performance of the basic gonorrhoea diagnostic. An alternative to improving diagnostics,  
31 treatment and surveillance is to develop a vaccine for gonorrhoea and to improve the uptake  
32 of other methods of prevention (such as condoms)<sup>25,26</sup>. A gonorrhoea vaccine has proved  
33 elusive due to the rapidly changing surface antigens, but there may be some cross-reactivity  
34 with vaccines designed to protect against *Neisseria meningitidis*<sup>27</sup>.  
35  
36  
37

38  
39 28 The main weakness of our study is that it did not address the population level impact of the  
40 introduction of such tests, but only considered a static situation<sup>24,25,28</sup>. Rapid whole genome  
41 sequencing (within 24 hours) has been introduced to help guide treatment decisions for  
42 important nosocomial pathogens, notably MRSA (methicillin-resistant *Staphylococcus*  
43 *aureus*)<sup>14</sup>, but in a community walk-in clinic setting for a low prevalence bacterial infection,  
44 such as gonorrhoea, a test needs to be relatively cheap and results available before the  
45 patient leaves the clinic. Our model did not include dynamic epidemiological or evolutionary  
46 processes, which change the prevalence and incidence of infection (and resistance) over  
47 time<sup>24</sup>. In reality, re-introduction of ciprofloxacin would likely increase the selection for  
48 resistance, which would negate some of the benefits of an AMR POCT. Similarly re-using  
49  
50  
51  
52  
53  
54  
55  
56  
57  
58  
59  
60

1  
2  
3 1 other drugs would also result in increases in resistance observed, including increasing  
4 2 selection for plasmids conferring multidrug resistance. Conversely, if point-of-care  
5 3 technology can reduce the time to treatment and reduce loss to follow-up sufficiently this  
6 4 might reduce the overall population prevalence, which would lead to a virtuous cycle of  
7 5 improved control and reduced transmission risk<sup>29</sup>. We also assume that results of point of  
8 6 care diagnostics can be provided within the clinical consultation. This is not currently  
9 7 possible unless the patient provides samples on arrival then waits to see a clinician or  
10 8 returns for a later appointment. The Cepheid GeneXpert has a turnaround time of about 90  
11 9 minutes which was previously found to result in the majority of men (16/19) not waiting for  
12 10 their results (6 were positive)<sup>30</sup>. Transmission dynamic models can explore the potential  
13 11 consequences without the risks associated with radical changes in prescribing practices.  
14 12 The next steps will be to develop dynamic models which include selective pressure under  
15 13 differing treatment options<sup>31</sup> and incorporating variable delays.

16 14  
17 15  
18 16 The important next questions arising from this study are: how much time does the reduction  
19 17 in use of ceftriaxone buy in terms of slowing or preventing the emergence of clinically  
20 18 relevant gonorrhoea resistant to ceftriaxone and, second, what are the population-level  
21 19 benefits of improved gonorrhoea control?  
22 20  
23 21  
24 22  
25 23

### 26 24 **Meaning of the study: possible explanations and implications for clinicians and 27 25 policymakers**

28 26 The major benefit of point of care tests for gonorrhoea is increasing the proportion of  
29 27 patients treated appropriately on the same day as the test, which is likely to improve  
30 28 outcomes by reducing infectious duration, reducing loss to follow-up and potentially  
31 29 improving partner notification efficacy. A definitive diagnosis on the day of first presentation  
32 30 also prevents unnecessary treatment of those not infected with gonorrhoea. The main  
33 31 benefit of an AMR POCT that can discriminate between susceptible and resistant infections  
34 32 is in enabling the re-introduction of abandoned first-line therapies. Reducing the use of  
35 33 antibiotics, especially of last-line therapies is a key aim of the UK national strategy on  
36 34 antimicrobial resistance. For heterosexual men and MSM a relatively large proportion of  
37 35 infections are already treated on the same day as testing, based on epidemiological, clinical  
38 36 or microbiological evidence (microscopy). However, this proportion is lower for women due  
39 37 to the higher percentage of asymptomatic infections and from poorer sensitivity of detection  
40 38 of gonorrhoea in endocervical and urethral smears. Although new POCTs are likely to be  
41 39  
42 40  
43 41  
44 42  
45 43  
46 44  
47 45  
48 46  
49 47  
50 48  
51 49  
52 50  
53 51  
54 52  
55 53  
56 54  
57 55  
58 56  
59 57  
60 58

1 more expensive than existing tests this would to some extent be offset by the reduction in  
2 further attendances and in the ability to re-use older, cheaper drugs. Given the low  
3 prevalence of gonorrhoea even in high-risk GUM attendees, the cost of treatment and re-  
4 attendances is small in comparison with the cost of attendances for testing and diagnosis. If  
5 a new discriminatory AMR POCT test were prohibitively expensive for routine use, a  
6 combination of a standard point-of-care NAAT (e.g. chlamydia/gonorrhoea) test could be  
7 considered in conjunction with a more specialised gonorrhoea AMR test, although the time  
8 implications of this for patients and clinicians would have to be carefully considered.

### 10 **Unanswered questions and future research**

11 This estimation of the potential reduction in ceftriaxone use is the first step towards  
12 evaluating the long-term effects of such a reduction. Future research investigating how  
13 much the useful lifespan of ceftriaxone as a therapy for gonorrhoea is extended with  
14 particular reductions in ceftriaxone use would be valuable. In the context of the often slow  
15 and expensive new drug pipeline, there is also a question to be answered around the value  
16 placed on each additional year of ceftriaxone availability.



## Acknowledgments

We would like to acknowledge Lord Jim O'Neill, Chairman of the Review on Antimicrobial Resistance and the review team for commissioning the study.

## Contributors

All authors were involved in the conception and design of the research. KT, EA and HC developed the models, following initial work by DM and NW and based on previous published work by EA & KT; KT and HC analysed the model results and all authors interpreted the results. HF and NW provided input into current clinical practice relating to AMR. KT, HC and NW wrote the first draft of the manuscript; all authors drafted the final version of the manuscript. All authors had full access to all of the data in the study and can take responsibility for the integrity of the data and the accuracy of the data analysis.

## Transparency declaration

The lead author affirms that this manuscript is an honest, accurate, and transparent account of the study being reported; that no important aspects of the study have been omitted; and that any discrepancies from the study as planned have been explained.

## Funding

The model was based on work previously funded by Aquarius Population Health<sup>17,18</sup>. KT, EA, KT and HC did not receive any funding from O'Neill review to undertake this project. HC was funded by the National Institute for Health Research Health Protection Research Unit (NIHR HPRU) in Evaluation of Interventions at the University of Bristol in partnership with Public Health England (PHE). The views expressed are those of the author(s) and not necessarily those of the NHS, the NIHR, the Department of Health or Public Health England.

## Competing interests

KT reports grants from EPSRC, during the conduct of the study; personal fees from Aquarius Population Health, other from WHO, grants from Guys and St Thomas Charity, outside the submitted work; and I am an editor of Sexually Transmitted Infections.; HC reports grants from NIHR, during the conduct of the study; other from Sanofi Pasteur, outside the submitted work; EA reports no compensation for the submitted work, and grants from Cepheid, Atlas Genetics, St Georges University of London, Enigma Diagnostics, and AstraZeneca, outside the submitted work; AM reports personal fees from Department of Health, non-financial support from Wellcome Trust, outside the submitted work; NW reports PHE's AMRHAI Reference Unit receiving financial support from Achaogen Inc., Allegra Antiinfectives GmbH, Amplex, AstraZeneca UK Ltd, Becton Dickinson Diagnostics, BSAC,

1  
2  
3 1 Cepheid, Check-Points B.V., Cubist Pharmaceuticals, Department of Health, Enigma  
4 2 Diagnostics, Food Standards Agency, GlaxoSmithKline Services Ltd, Henry Stewart Talks,  
5 3 IHMA Ltd, Merck Sharpe & Dohme Corp., Meiji Seika Kiasya Ltd, Momentum Biosciences  
6 4 Ltd, Nordic Pharma Ltd, Norgine Pharmaceuticals, Rempex Pharmaceuticals Ltd, Rokitan  
7 5 Ltd, Smith & Nephew UK Ltd, Trius Therapeutics, VenatoRx and Wockhardt Ltd, outside the  
8 6 submitted work. DM and HF: no conflicts to declare.  
9  
10  
11  
12

### 13 7 14 8 **Ethical approval**

15 9 Ethical approval was not required for this research, which uses routinely collected data and  
16 10 data from other studies.  
17  
18

### 19 11 20 12 **Data sharing**

21 13 Details of the model data inputs and other assumptions are provided in the methods and  
22 14 supporting parameters table. The model is available from <http://amr-review.org/file/429> and  
23 15 researchers interested in further details may contact the corresponding author  
24 16 at [katy.turner@bristol.ac.uk](mailto:katy.turner@bristol.ac.uk)  
25  
26  
27  
28

### 29 17 30 18 **Copyright**

31 19 The Corresponding Author has the right to grant on behalf of all authors and does grant on  
32 20 behalf of all authors, an exclusive licence on a worldwide basis to the BMJ Publishing Group  
33 21 Ltd to permit this article (if accepted) to be published in BMJ editions and any other BMJPG  
34 22 products and sublicences such use and exploit all subsidiary rights, as set out in our licence.  
35  
36  
37  
38  
39  
40  
41  
42  
43  
44  
45  
46  
47  
48  
49  
50  
51  
52  
53  
54  
55  
56  
57  
58  
59  
60

1  
2  
3  
4  
5  
6  
7  
8  
9  
10  
11  
12  
13  
14  
15  
16  
17  
18  
19  
20  
21  
22  
23  
24  
25  
26  
27  
28  
29  
30  
31  
32  
33  
34  
35  
36  
37  
38  
39  
40  
41  
42  
43  
44  
45  
46  
47  
48  
49  
50  
51  
52  
53  
54  
55  
56  
57  
58  
59  
60

1  
2  
3  
4  
5  
6  
7  
8  
9  
10  
11  
12  
13  
14  
15  
16  
17  
18  
19  
20  
21

Figure 1: Number of gonorrhoea diagnoses reported in England, 2006 – 2015, with the change in recommended first line antibiotic treatment shown.

Legend: Data from Public Health England, Annual STI Data Tables

<https://www.gov.uk/government/statistics/sexually-transmitted-infections-stis-annual-data-tables>

Figure 2 Current patient pathways for gonorrhoea

Figure 3 Patient pathway diagram to illustrate the flow for men who have sex with men under A) current care, B) antimicrobial resistance point-of-care test

Legend: In scenario A, all diagnosed cases are treated with ceftriaxone plus azithromycin. In scenario B, diagnosed cases are treated according to resistance profile: AMR cases with ceftriaxone plus azithromycin; non-AMR with ciprofloxacin. Numbers of AMR and non-AMR infection are based on current levels of ciprofloxacin resistance observed in GRASP surveillance data, 2014. Illustrated based on 100,000 MSM attending a genitourinary medicine clinic.

1 Table 1 Principal results comparing use of an antimicrobial resistance point-of-care test  
 2 (AMR POCT) for ciprofloxacin (Scenario 3a) or penicillin resistance (Scenario 3b) against  
 3 current testing practice (standard laboratory testing, no POCT) for the management of  
 4 gonorrhoea (Scenario 1), assuming the current attendance at GUM clinic annually

|                                                                  | Heterosexual<br>male | MSM   | Female | Overall |
|------------------------------------------------------------------|----------------------|-------|--------|---------|
| <i>Considering use of POCT test for ciprofloxacin resistance</i> |                      |       |        |         |
| Annual ceftriaxone treatments                                    |                      |       |        |         |
| Current (scenario 1)                                             | 7690                 | 17691 | 8050   | 33431   |
| AMR POCT (scenario 3a)                                           | 2188                 | 7933  | 1257   | 11378   |
| Reduction under scenario 3a                                      | 5502                 | 9759  | 6793   | 22054   |
| Percentage reduction in ceftriaxone                              | 72%                  | 55%   | 84%    | 66%     |
| Proportion treated same day                                      |                      |       |        |         |
| Current (scenario 1)                                             | 68%                  | 63%   | 21%    | 54%     |
| AMR POCT (scenario 3a)                                           | 100%                 | 100%  | 100%   | 100%    |
| Increase under scenario 3a                                       | 32%                  | 37%   | 79%    | 46%     |
| Mean time to treatment (days)                                    |                      |       |        |         |
| Current (scenario 1)                                             | 1.5                  | 1.8   | 3.9    | 2.2     |
| AMR POCT (scenario 3a)                                           | 0.0                  | 0.0   | 0.0    | 0.0     |
| Reduction under scenario 3a                                      | 1.5                  | 1.8   | 3.9    | 2.2     |
| Persons lost to follow up (untreated)                            |                      |       |        |         |
| Current (scenario 1)                                             | 125                  | 338   | 329    | 792     |
| AMR POCT (scenario 3a)                                           | 0                    | 0     | 0      | 0       |
| <i>Considering use of POCT test for penicillin resistance</i>    |                      |       |        |         |
| Annual ceftriaxone treatments*                                   |                      |       |        |         |
| Current (scenario 1)                                             | 7690                 | 17691 | 8050   | 33431   |
| AMR POCT (scenario 3b)                                           | 1407                 | 4688  | 838    | 6932    |
| Reduction under scenario 3b                                      | 6283                 | 13004 | 7212   | 26499   |
| Percentage reduction in ceftriaxone                              | 82%                  | 74%   | 90%    | 79%     |

\*All other outcomes same as for use of POCT for ciprofloxacin resistance. MSM, men who have sex with men. Results for strategy 2 not shown – equivalent to strategy 3 except for choice of antibiotic treatment. Results for 3b also equivalent to 3a for outcomes except reduction in ceftriaxone treatments.

#### 5 **Definitions**

6 **GUM: Genitourinary medicine clinic, POCT: Point of care test, AMR: Antimicrobial**  
 7 **resistance, MSM: Men who have sex with men**

1  
2  
3 1 Table 2 Cost of testing and treatment\* when using an antimicrobial resistance point-of-care  
4 2 test (AMR POCT) for ciprofloxacin resistance (strategy 3a) compared with current practice

|                              | Heterosexual<br>male | MSM         | Female       | Overall      |
|------------------------------|----------------------|-------------|--------------|--------------|
| Annual cost of testing       |                      |             |              |              |
| Current                      | £69,784,517          | £20,358,694 | £105,826,467 | £195,969,677 |
| AMR POCT                     | £82,415,040          | £23,338,080 | £124,653,600 | £230,406,720 |
| Increased cost with AMR POCT | £12,630,523          | £2,979,386  | £18,827,133  | £34,437,043  |

12 \*The model assumes that the additional cost of AMR POCT (£25) is simply added to the cost of  
13 attendance, and is not offset by reductions in the number of gonorrhoea infections, by reduced  
14 treatment costs (as some patients are treated with cheaper antibiotics), or by reduced use of other  
15 tests (such as microscopy or culture of all swabs).

1  
2  
3  
4  
5  
6  
7  
8  
9  
10  
11  
12  
13  
14  
15  
16  
17  
18  
19  
20  
21  
22  
23  
24  
25  
26  
27  
28  
29  
30  
31  
32  
33  
34  
35  
36  
37  
38  
39  
40  
41  
42  
43  
44  
45  
46  
47  
48  
49  
50  
51  
52  
53  
54  
55  
56  
57  
58  
59  
60  
**REFERENCE LIST**

1. WHO. Antimicrobial resistance global report on surveillance: 2014 summary. . 2014.
2. Health UGDo. UK Five Year Antimicrobial Resistance Strategy 2013 to 2018., 2011.
3. Public Health England. STI diagnoses & rates by gender, sexual risk & age group, 2011 - 2015, 2016.
4. Korenromp EL, Sudaryo MK, de Vlas SJ, et al. What proportion of episodes of gonorrhoea and chlamydia becomes symptomatic? *Int J STD AIDS* 2002; **13**(2): 91-101.
5. Yeh JM, Hook EW, 3rd, Goldie SJ. A refined estimate of the average lifetime cost of pelvic inflammatory disease. *Sex Transm Dis* 2003; **30**(5): 369-78.
6. Chesson HW, Pinkerton SD. Sexually transmitted diseases and the increased risk for HIV transmission: implications for cost-effectiveness analyses of sexually transmitted disease prevention interventions. *J Acquir Immune Defic Syndr* 2000; **24**(1): 48-56.
7. England PH. GRASP Report 2016, 2016.
8. Bignell C, Fitzgerald M, Guideline Development G, British Association for Sexual H, Hiv UK. UK national guideline for the management of gonorrhoea in adults, 2011. *Int J STD AIDS* 2011; **22**(10): 541-7.
9. Public Health England GRASP Steering Committee and BASHH CEG. Gonorrhoea Treatment Position Statement 2015.
10. Hemarajata P, Yang S, Soge OO, Humphries RM, Klausner JD. Performance and Verification of a Real-Time PCR Assay Targeting the *gyrA* Gene for Prediction of Ciprofloxacin Resistance in *Neisseria gonorrhoeae*. *J Clin Microbiol* 2016; **54**(3): 805-8.
11. Chaudhry U, Ray K, Bala M, Saluja D. Mutation patterns in *gyrA* and *parC* genes of ciprofloxacin resistant isolates of *Neisseria gonorrhoeae* from India. *Sex Transm Infect* 2002; **78**(6): 440-4.
12. De Silva D, Peters J, Cole K, et al. Whole-genome sequencing to determine transmission of *Neisseria gonorrhoeae*: an observational study. *Lancet Infect Dis* 2016; **16**(11): 1295-303.
13. Allen VG, Melano RG. Whole-genome sequencing-new tools for gonorrhoea control. *Lancet Infect Dis* 2016; **16**(11): 1214-5.
14. Aanensen DM, Feil EJ, Holden MT, et al. Whole-Genome Sequencing for Routine Pathogen Surveillance in Public Health: a Population Snapshot of Invasive *Staphylococcus aureus* in Europe. *MBio* 2016; **7**(3).
15. Harding-Esch EM, Nori AV, Hegazi A, et al. Impact of deploying multiple point-of-care tests with a 'sample first' approach on a sexual health clinical care pathway. A service evaluation. *Sex Transm Infect* 2017.
16. Vickerman P, Watts C, Alary M, Mabey D, Peeling RW. Sensitivity requirements for the point of care diagnosis of *Chlamydia trachomatis* and *Neisseria gonorrhoeae* in women. *Sexually Transmitted Infections* 2003; **79**(5): 363-7.
17. Turner KM, Round J, Horner P, et al. An early evaluation of clinical and economic costs and benefits of implementing point of care NAAT tests for *Chlamydia trachomatis* and *Neisseria gonorrhoea* in genitourinary medicine clinics in England. *Sex Transm Infect* 2014; **90**(2): 104-11.
18. Adams EJ, Ehrlich A, Turner KM, et al. Mapping patient pathways and estimating resource use for point of care versus standard testing and treatment of chlamydia and gonorrhoea in genitourinary medicine clinics in the UK. *BMJ Open* 2014; **4**(7): e005322.
19. Public Health England. STI diagnoses & rates by gender, sexual risk & age group, 2010 - 2014, 2015.
20. Mercer CH, Macdonald N, Shirley MDF, et al. The Maximising STI Control (MSTIC) webtool: a new approach to facilitate the planning of services for sexually transmitted infections to maximise public health benefit. *Lancet* 2013; **382**: 6-.
21. Kent CK, Chaw JK, Wong W, et al. Prevalence of rectal, urethral, and pharyngeal chlamydia and gonorrhea detected in 2 clinical settings among men who have sex with men: San Francisco, California, 2003. *Clin Infect Dis* 2005; **41**(1): 67-74.

- 1  
2  
3 1 22. England. PH. Surveillance of antimicrobial resistance in *Neisseria gonorrhoeae*. Key  
4 2 findings from the 'Gonococcal resistance to antimicrobials surveillance programme'  
5 3 (GRASP) and related surveillance data, 2014.  
6 4 23. Monitor and NHS England. 2014/15 National Tariff Payment System, 2013.  
7 5 24. Grad YH, Goldstein E, Lipsitch M, White PJ. Improving Control of Antibiotic-Resistant  
8 6 Gonorrhoea by Integrating Research Agendas Across Disciplines: Key Questions Arising  
9 7 From Mathematical Modeling. *J Infect Dis* 2016; **213**(6): 883-90.  
10 8 25. Garnett GP. The theoretical impact and cost-effectiveness of vaccines that protect  
11 9 against sexually transmitted infections and disease. *Vaccine* 2014; **32**(14): 1536-42.  
12 10 26. Regnier SA, Huels J. Potential impact of vaccination against *Neisseria meningitidis*  
13 11 on *Neisseria gonorrhoeae* in the United States: results from a decision-analysis model. *Hum*  
14 12 *Vaccin Immunother* 2014; **10**(12): 3737-45.  
15 13 27. Whelan J, Klovstad H, Haugen IL, Holle MR, Storsaeter J. Ecologic Study of  
16 14 Meningococcal B Vaccine and *Neisseria gonorrhoeae* Infection, Norway. *Emerg Infect Dis*  
17 15 2016; **22**(6): 1137-9.  
18 16 28. O'Neill J. Tackling Drug-Resistant Infections Globally: final report and  
19 17 recommendations. The review on antimicrobial resistance, 2016.  
20 18 29. White PJ, Ward H, Cassell JA, Mercer CH, Garnett GP. Vicious and virtuous circles  
21 19 in the dynamics of infectious disease and the provision of health care: gonorrhoea in Britain  
22 20 as an example. *J Infect Dis* 2005; **192**(5): 824-36.  
23 21 30. Harding-Esch EM, Hegazi A, Okolo O, et al. P2.163 Do "In-Clinic" Molecular and  
24 22 Non-Molecular Rapid Tests Improve Patient Management? *Sexually Transmitted Infections*  
25 23 2013; **89**(Suppl 1): A137-A8.  
26 24 31. McAdams D. Resistance diagnosis and the changing epidemiology of antibiotic  
27 25 resistance. *Ann N Y Acad Sci* 2017; **1388**(1): 5-17.  
28 26

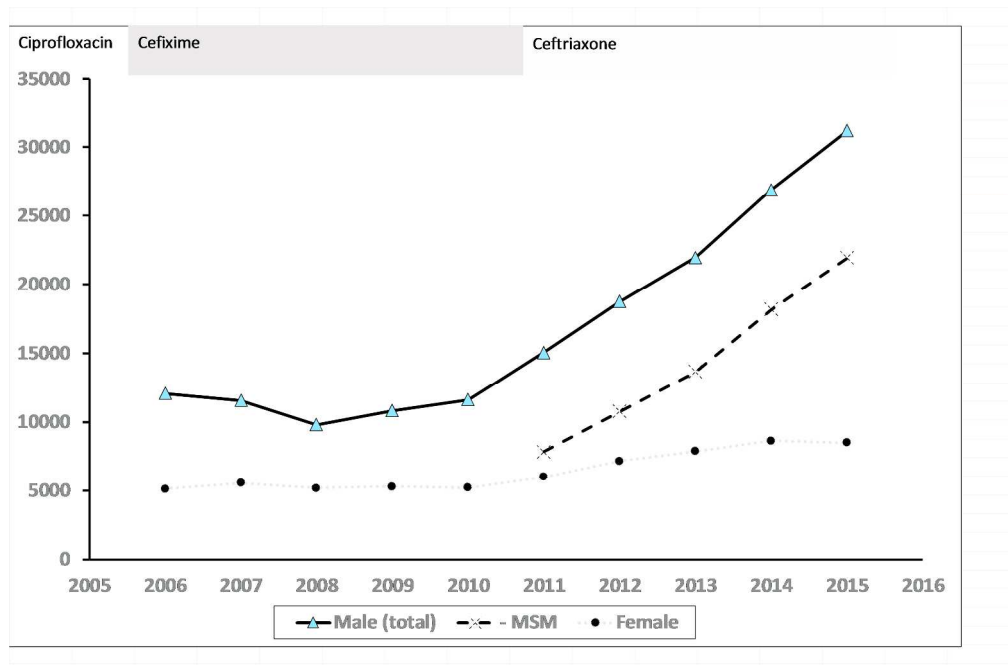

Figure 1

270x177mm (300 x 300 DPI)



1  
2  
3  
4  
5  
6  
7  
8  
9  
10  
11  
12  
13  
14  
15  
16  
17  
18  
19  
20  
21  
22  
23  
24  
25  
26  
27  
28  
29  
30  
31  
32  
33  
34  
35  
36  
37  
38  
39  
40  
41  
42  
43  
44  
45  
46  
47  
48  
49  
50  
51  
52  
53  
54  
55  
56  
57  
58  
59  
60

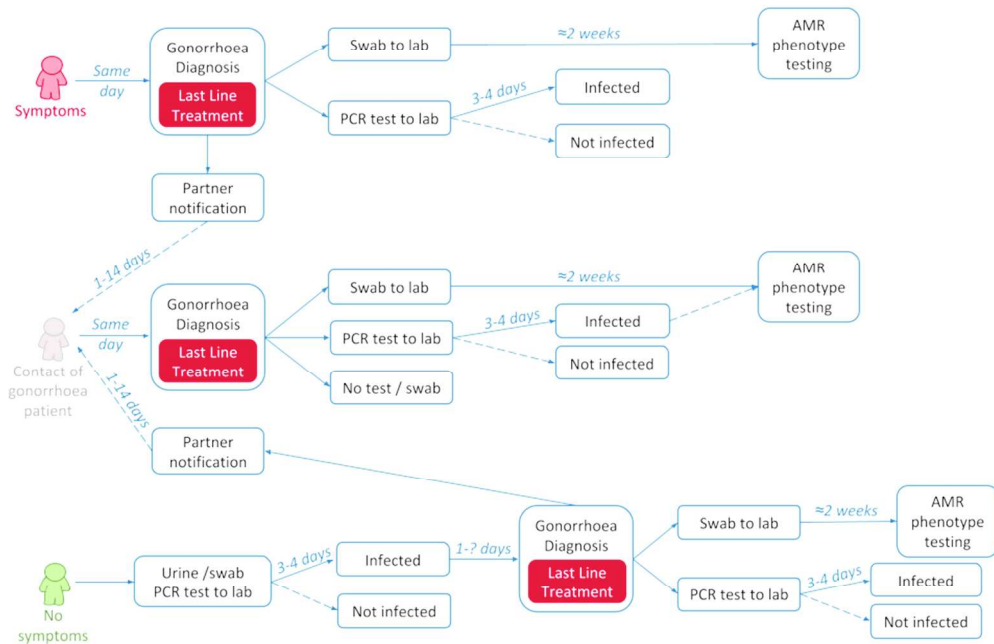

Figure 2

203x152mm (300 x 300 DPI)

ew only

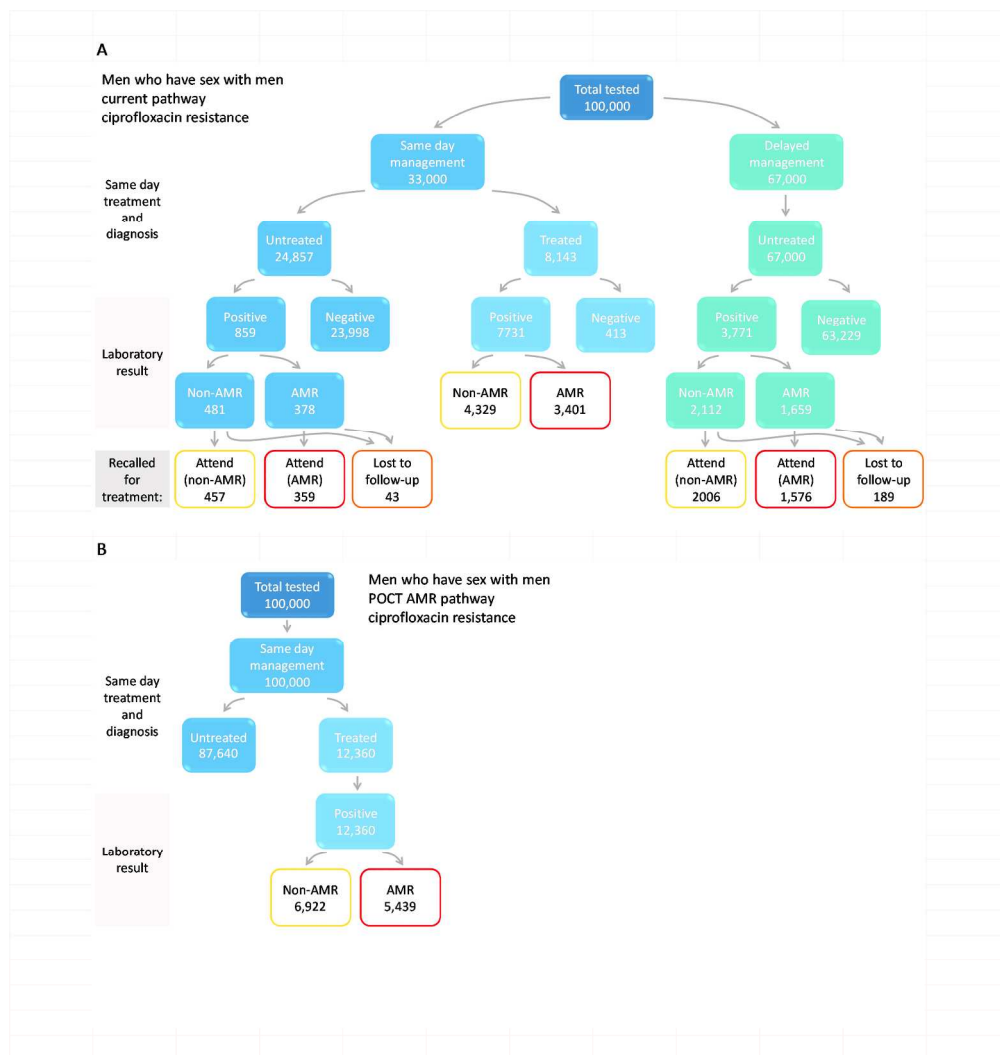

Figure 3

203x213mm (300 x 300 DPI)

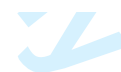

DRAFT 29 June 2016

**Supplementary information for:****Analysis of the potential for point-of-care test to enable individualised treatment of infections caused by antimicrobial-resistant and susceptible strains of *Neisseria gonorrhoeae***

Katy ME Turner, Hannah Christensen, Elisabeth J Adams, David McAdams, Helen Fifer, Anthony McDonnell, Neil Woodford

Table A1 Current prevalence of antimicrobial resistance to potential treatments for gonorrhoea

| Drug          | Class                                      | Prevalence of resistance in GRASP 2014 isolates <sup>1</sup> |      |       |         |
|---------------|--------------------------------------------|--------------------------------------------------------------|------|-------|---------|
|               |                                            | Heterosexual men                                             | MSM  | Women | Overall |
| Ceftriaxone   | Cephalosporin (3 <sup>rd</sup> generation) | 0                                                            | 0    | 0     | 0       |
| Penicillin    | $\beta$ -lactam                            | 18%                                                          | 26%  | 10%   | 23%     |
| Ciprofloxacin | Fluoroquinolone                            | 28%                                                          | 44%  | 15%   | 37%     |
| Azithromycin  | Macrolide                                  | 0.0%                                                         | 1.4% | 0.5%  | 1.0%    |

Current first line (and last-line) therapy is intramuscular ceftriaxone with azithromycin 1g orally. MSM, men who have sex with men.  
GRASP: Gonococcal Resistance to Antimicrobial Surveillance Programme

DRAFT 29 June 2016

Table A2 Model parameters

| Baseline model parameters                                                                                                   | Current          |         |         | AMR POCT         |                  |                  |
|-----------------------------------------------------------------------------------------------------------------------------|------------------|---------|---------|------------------|------------------|------------------|
|                                                                                                                             | Heterosexual men | MSM     | Women   | Heterosexual men | MSM              | Women            |
| Initial population size <sup>2</sup>                                                                                        | 515,094          | 145,863 | 779,085 | 515,094          | 145,863          | 779,085          |
| Proportion entering same day management pathway                                                                             | 35%              | 33%     | 48%     | 100%             | 100%             | 100%             |
| Proportion infected with gonorrhoea (of total tested) <sup>2</sup>                                                          | 1.5%             | 12.4%   | 1.1%    | 1.5%             | 12.4%            | 1.1%             |
| Proportion of those in same day pathway infected with gonorrhoea                                                            | 3.1%             | 26.0%   | 1.0%    | 1.5%             | 12.4%            | 1.1%             |
| Proportion of delayed management infected with gonorrhoea                                                                   | 0.7%             | 5.6%    | 1.2%    | -                | -                | -                |
| Relative risk infection gonorrhoea in same day vs delayed pathway                                                           | 4.52             | 4.63    | 0.82    | -                | -                | -                |
| Proportion in same day pathway who are infected & treated on same day                                                       | 96%              | 90%     | 50%     | 100%             | 100%             | 100%             |
| Proportion of same day pathway treated presumptively for gonorrhoea                                                         | 5.0%             | 25.0%   | 2.0%    | 1.5%             | 12.4%            | 1.1%             |
| Proportion who attend for treatment after lab test result (of those who wait for lab test results, i.e. asymptomatic group) | 95%              | 95%     | 95%     | 100%             | 100%             | 100%             |
| Proportion treated with last line therapy <sup>3</sup>                                                                      | 100%             | 100%    | 100%    | 28% <sup>a</sup> | 44% <sup>a</sup> | 15% <sup>a</sup> |
| Cost of first attendance <sup>4,5</sup>                                                                                     | £135             | £135    | £135    | £135             | £135             | £135             |
| Cost of follow-up attendance <sup>4,5</sup>                                                                                 | £104             | £104    | £104    | £104             | £104             | £104             |

AMR POCT, antimicrobial resistance point of care test; MSM, men who have sex with men.

<sup>a</sup>Assuming POCT for ciprofloxacin susceptibility (can be adjusted for penicillin according to parameters in Table A1 or updated to reflect local trends)

DRAFT 29 June 2016

Figure A1

A – Heterosexual men current pathway

Heterosexual males current pathway ciprofloxacin resistance

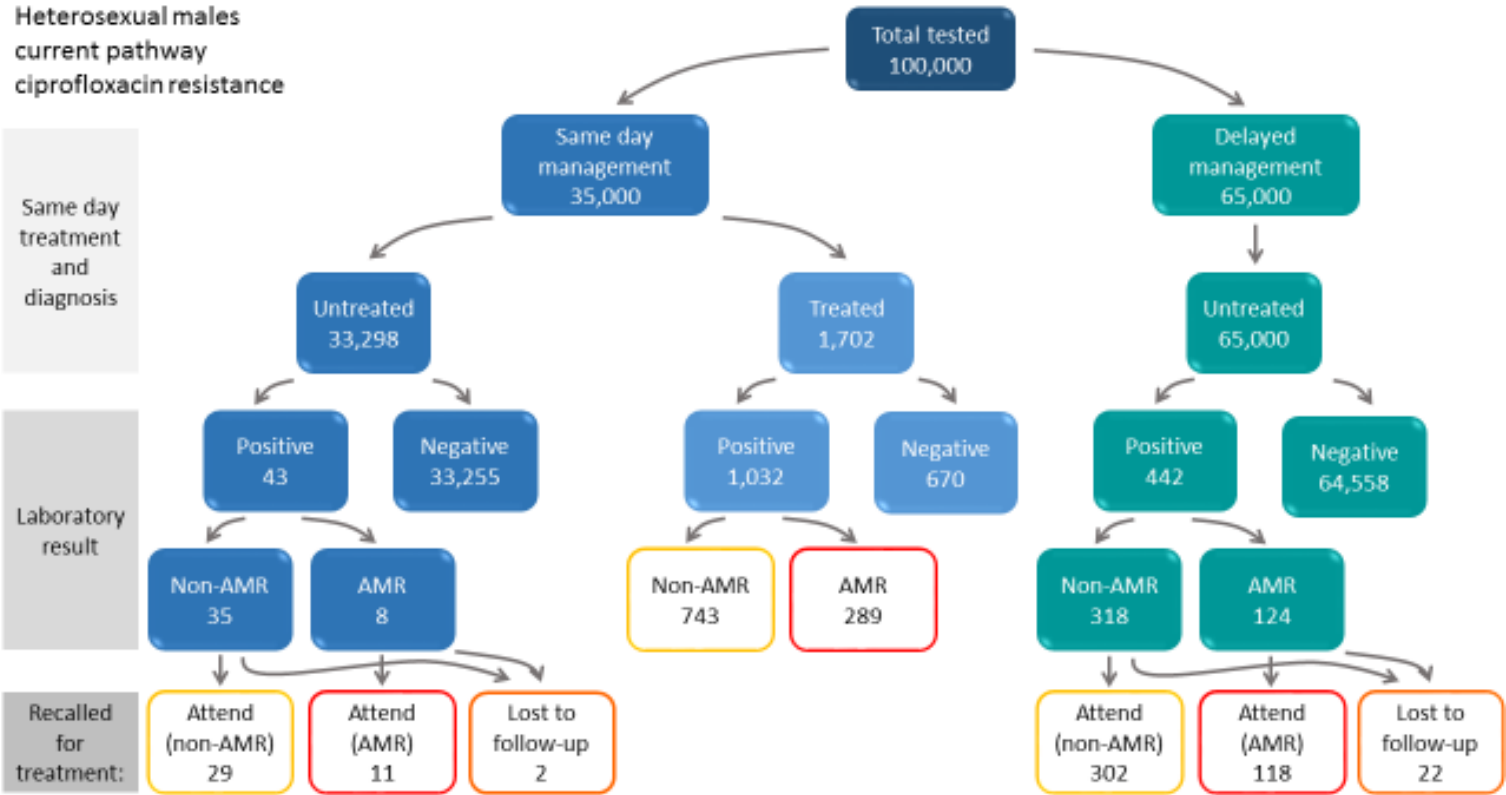

DRAFT 29 June 2016

1  
2  
3  
4  
5  
6  
7  
8  
9  
10  
11  
12  
13  
14  
15  
16  
17  
18  
19  
20  
21  
22  
23  
24  
25  
26  
27  
28  
29  
30  
31  
32  
33  
34  
35  
36  
37  
38  
39  
40  
41  
42  
43  
44  
45  
46  
47

1 **B – Heterosexual men POCT pathway**

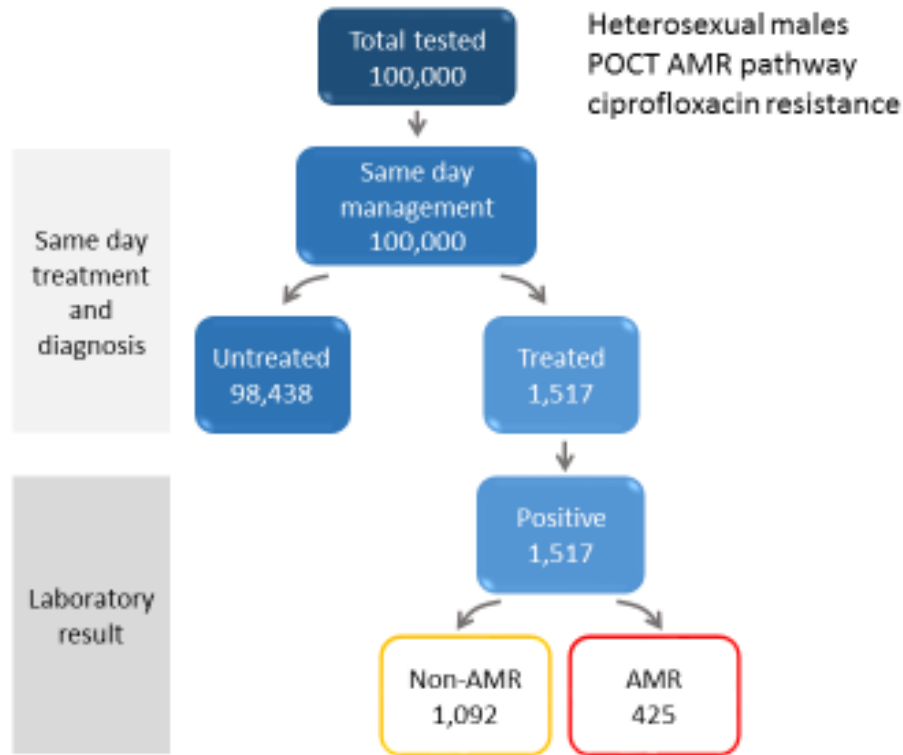

2  
3

DRAFT 29 June 2016

1  
2  
3  
4  
5  
6  
7  
8  
9  
10  
11  
12  
13  
14  
15  
16  
17  
18  
19  
20  
21  
22  
23  
24  
25  
26  
27  
28  
29  
30  
31  
32  
33  
34  
35  
36  
37  
38  
39  
40  
41  
42  
43  
44  
45  
46  
47

1 **C – Women current pathway**

**Females  
current pathway  
ciprofloxacin resistance**

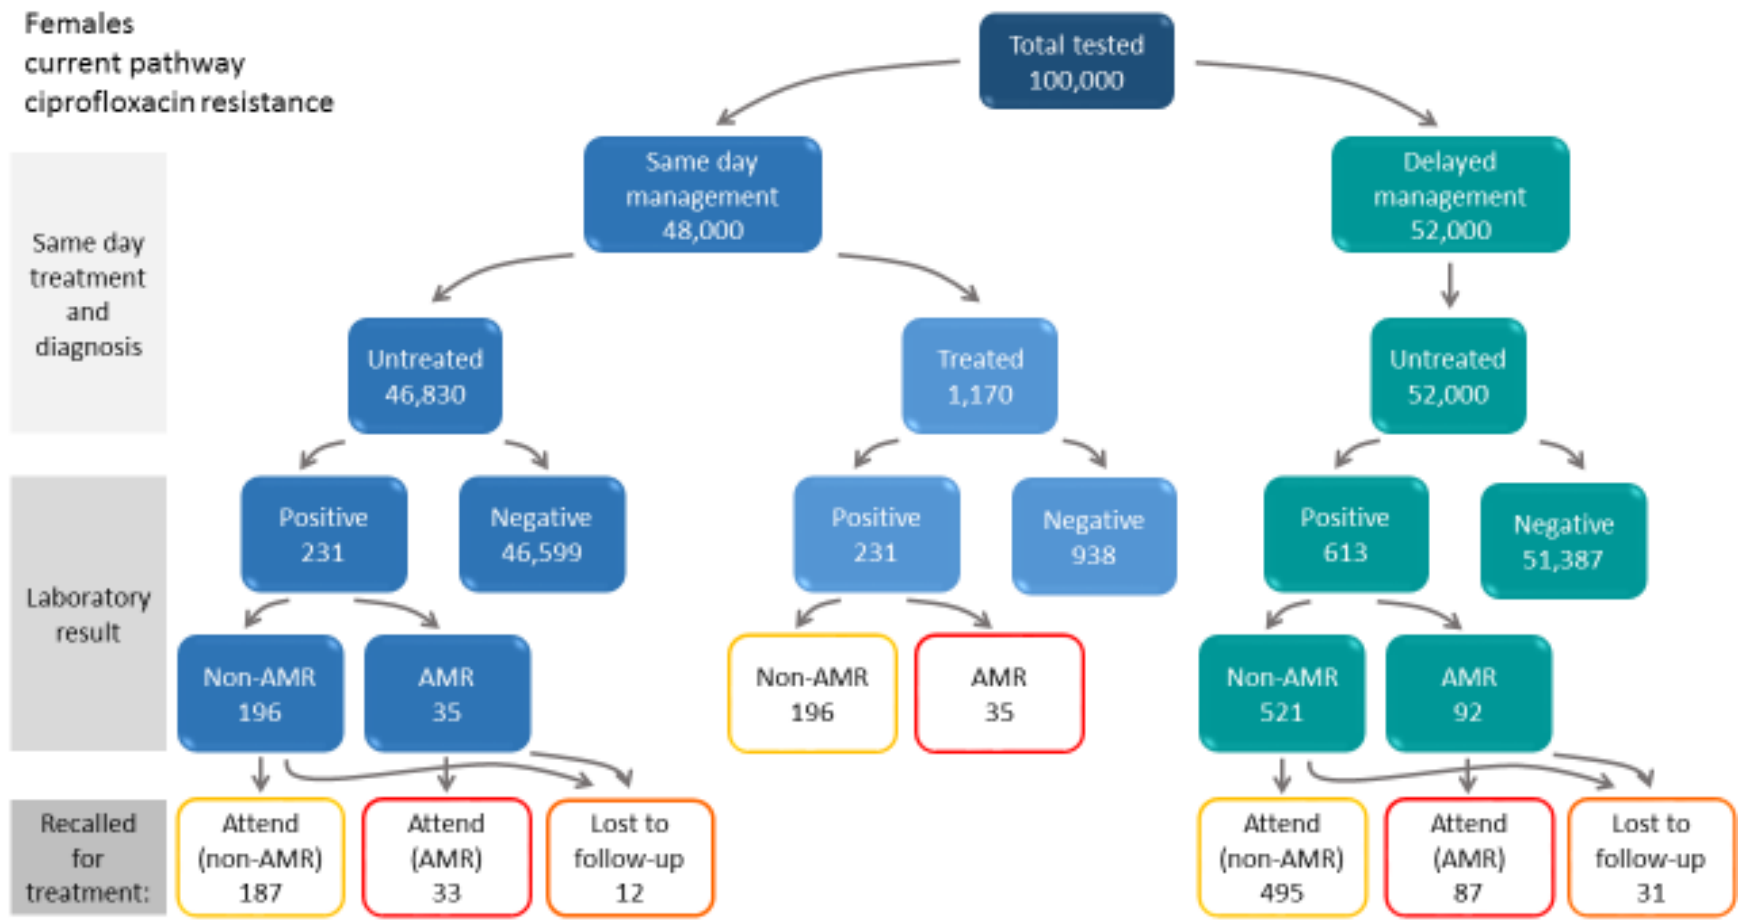

2  
3

DRAFT 29 June 2016

1  
2  
3  
4  
5  
6  
7  
8  
9  
10  
11  
12  
13  
14  
15  
16  
17  
18  
19  
20  
21  
22  
23  
24  
25  
26  
27  
28  
29  
30  
31  
32  
33  
34  
35  
36  
37  
38  
39  
40  
41  
42  
43  
44  
45  
46  
47

1 **D – Women new pathway**

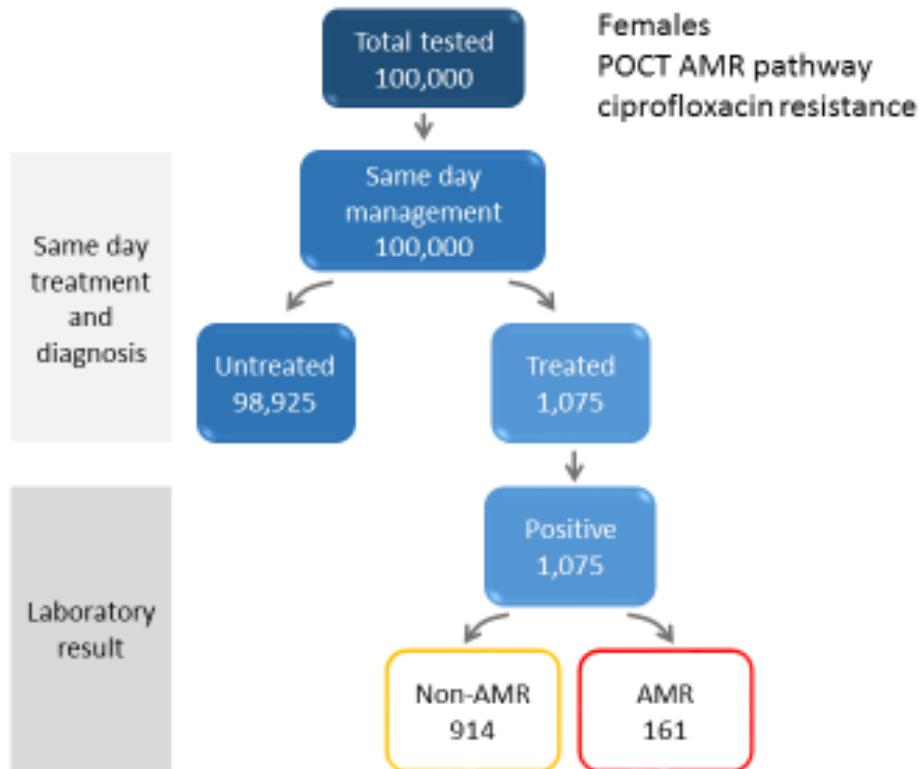

2



DRAFT 29 June 2016

**References**

- 1 Adams EJ, Ehrlich A, Turner KM, Shah K, Macleod J, Goldenberg S, et al. Mapping patient pathways and estimating resource use for point of care versus standard testing and treatment of chlamydia and gonorrhoea in genitourinary medicine clinics in the UK. *BMJ Open* 2014; 4(7): e005322.
- 2 Public Health England. STI diagnoses & rates by gender, sexual risk & age group, 2010 - 2014, 2015.
- 3 England. PH. Surveillance of antimicrobial resistance in *Neisseria gonorrhoeae*. Key findings from the 'Gonococcal resistance to antimicrobials surveillance programme' (GRASP) and related surveillance data, 2014.
- 4 Monitor and NHS England. 2014/15 National Tariff Payment System, 2013.
- 5 Health PHEatDo. HIV, sexual and reproductive health: current issues bulletin 2013. Available from: [https://www.gov.uk/government/uploads/system/uploads/attachment\\_data/file/259087/HIV\\_Sexual\\_and\\_Reproductive\\_Health\\_bulletin-issue1nov2013.pdf](https://www.gov.uk/government/uploads/system/uploads/attachment_data/file/259087/HIV_Sexual_and_Reproductive_Health_bulletin-issue1nov2013.pdf).
- 6 Turner KM, Round J, Horner P, Macleod J, Goldenberg S, Deol A, et al. An early evaluation of clinical and economic costs and benefits of implementing point of care NAAT tests for *Chlamydia trachomatis* and *Neisseria gonorrhoea* in genitourinary medicine clinics in England. *Sex Transm Infect* 2014; 90(2): 104-11.
